# Supplementary material for: Pd(ii)-Catalyzed alkyne annulation through allylic isomerization: synthesis of spiro-cyclopentadiene pyrazolones
Source: Royal Society of Chemistry journal article supplement (doi:10.1039/d1cc02155a), 2021-01-01

# **Pd(II)-Catalyzed alkyne annulation through allylic isomerization: Synthesis of spiro-cyclopentadiene pyrazolones**

Sumi Changmai,<sup>a</sup> Sabera Sultana,<sup>a</sup> Bipul Sarma,<sup>b</sup> and Sanjib Gogoi<sup>a\*</sup>

<sup>a</sup>Chemical Sciences & Technology Division, CSIR-North East Institute of Science and Technology, Jorhat-785006, AcSIR-Ghaziabad-201002, India, Fax: +913762370011 Tel.: +913762372948; skgogoi1@gmail.com; sanjibgogoi@neist.res.in. <sup>b</sup>Department of Chemical Sciences, Tezpur University, Napaam, Tezpur-784028, India.

## **Supporting Information**

## Contents

|                         |       |
|-------------------------|-------|
| General Experiment      | 3     |
| Experimental Procedures | 3-8   |
| Characterization Data   | 9-21  |
| Spectra of NMR & HRMS   | 22-79 |
| NOE Spectra             | 80-85 |
| X-ray data              | 86    |

## 1. General Information

Melting points were measured with a Buchi B-540 melting point apparatus and are uncorrected. NMR spectra were recorded on Bruker Avance III 500 MHz FT NMR & Jeol Resonance ECZ 400 MHz FT NMR spectrometer using tetramethylsilane (TMS) as an internal standard. All the commercially available reagents were used as received. All experiments were monitored by thin layer chromatography. TLC was performed on Merck TLC Silica gel 60 F254 precoated plates. Column chromatography was performed on silica gel of 100-200 mesh obtained from Merck. HRMS data were recorded by electron spray ionization with a Q-TOF mass analyzer. Photophysical properties were evaluated on HITACHI (U-3900) UV-Vis spectrophotometer and Horiba (Fluorolog-3) fluorescence spectrophotometer

## 2. Reaction Procedures

### 2.1 General procedure for the synthesis of antipyrene derivatives (**1**)<sup>1</sup>

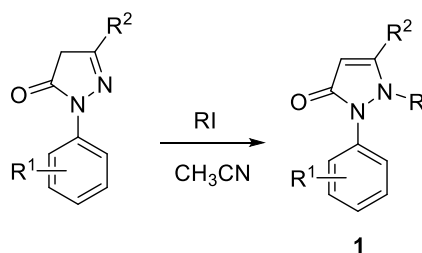

**Scheme SI-1:** Synthesis of antipyrene derivatives

**Preparation of antipyrene (1):** 2-Phenyl pyrazolones were synthesized by following a known procedure.<sup>1</sup> To a stirred solution of 2-phenyl pyrazolone (1.0 equiv), in acetonitrile (4.0 mL), methyl iodide/alkyl iodide (5.0 equiv) was added. The reaction mixture was heated in a sealed tube for 12 h. The solvent was removed under vacuo and the crude reaction mixture was purified by alumina column chromatography using EtOAc as the eluent to afford antipyrenes **1**.

## 2.2. Optimization of the reaction conditions for the synthesis of compound **3aa**

**Table SI-1** Optimization of the reaction conditions for **3aa**<sup>a</sup>

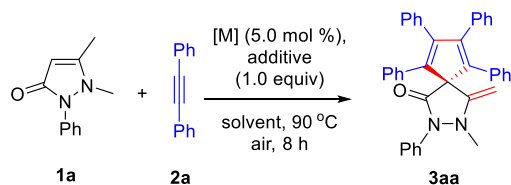

| Entry             | Catalyst                                                | Additive                               | Solvent           | <b>3aa</b> (%) <sup>b</sup> |
|-------------------|---------------------------------------------------------|----------------------------------------|-------------------|-----------------------------|
| 1                 | [{RuCl <sub>2</sub> ( <i>p</i> -cymene)} <sub>2</sub> ] | Cu(OAc) <sub>2</sub> ·H <sub>2</sub> O | 1,4-Dioxane       | 0                           |
| 2                 | [RhCp*Cl <sub>2</sub> ] <sub>2</sub>                    | Cu(OAc) <sub>2</sub> ·H <sub>2</sub> O | 1,4-Dioxane       | 0                           |
| 3                 | Pd(OAc) <sub>2</sub>                                    | Cu(OAc) <sub>2</sub> ·H <sub>2</sub> O | 1,4-Dioxane       | 48                          |
| 4                 | PdCl <sub>2</sub>                                       | Cu(OAc) <sub>2</sub> ·H <sub>2</sub> O | 1,4-Dioxane       | 0                           |
| 5                 | Pd(OAc) <sub>2</sub>                                    | AgOAc                                  | 1,4-Dioxane       | 20                          |
| 6                 | Pd(OAc) <sub>2</sub>                                    | CsOAc                                  | 1,4-Dioxane       | 36                          |
| 7                 | Pd(OAc) <sub>2</sub>                                    | NaOAc                                  | 1,4-Dioxane       | 38                          |
| 8                 | Pd(OAc) <sub>2</sub>                                    | KOAc                                   | 1,4-Dioxane       | 45                          |
| 9                 | Pd(OAc) <sub>2</sub>                                    | Cu(OAc) <sub>2</sub> ·H <sub>2</sub> O | Toluene           | 74                          |
| 10                | Pd(OAc) <sub>2</sub>                                    | Cu(OAc) <sub>2</sub> ·H <sub>2</sub> O | MeCN              | 15                          |
| 11                | Pd(OAc) <sub>2</sub>                                    | Cu(OAc) <sub>2</sub> ·H <sub>2</sub> O | <sup>t</sup> AmOH | 79                          |
| 12 <sup>[c]</sup> | Pd(OAc) <sub>2</sub>                                    | Cu(OAc) <sub>2</sub> ·H <sub>2</sub> O | MeOH              | 47                          |
| 13                | Pd(OAc) <sub>2</sub>                                    | Cu(OAc) <sub>2</sub> ·H <sub>2</sub> O | DMF               | 0                           |
| 14                | Pd(OAc) <sub>2</sub>                                    | Cu(OAc) <sub>2</sub> ·H <sub>2</sub> O | DMSO              | 0                           |

<sup>a</sup>Reaction conditions: **1a** (0.5 mmol), **2a** (1.0 mmol), catalyst (5.0 mol %), additive (0.5 mmol) and solvent (5.0 mL) at 90 °C under air for 8 h; unless otherwise mentioned. <sup>b</sup>Isolated yields. <sup>c</sup>Reaction was performed at 64 °C.

### **2.3 General procedure for the synthesis of spiro-pyrazolone derivatives 3**

A mixture of antipyrine (**1**, 0.5 mmol), alkyne (**2**, 1.0 mmol), Pd(OAc)<sub>2</sub> (5.0 mol %) and Cu(OAc)<sub>2</sub>.H<sub>2</sub>O (0.5 mmol) in *t*AmOH (5.0 mL) was stirred at 90 °C under open air for 8 hours. The solvent *t*AmOH was removed under vacuo and the crude reaction mixture was poured into water and extracted with ethylacetate (25 mL x 2). The organic layer was then washed with brine and dried over anhydrous Na<sub>2</sub>SO<sub>4</sub>. The solvent was removed under vacuo and the crude product obtained was purified by silica gel (100-200 mesh) column chromatography using 5% EtOAc in hexane as the eluent to afford spiro-pyrazolones **3**.

### **2.4 General procedure for one pot synthesis of spiro-pyrazolone derivatives 4**

A mixture of antipyrine (**1**, 0.5 mmol), alkyne (**2**, 1.0 mmol), Pd(OAc)<sub>2</sub> (5.0 mol %) and Cu(OAc)<sub>2</sub>.H<sub>2</sub>O (0.5 mmol) in toluene (5.0 mL) was stirred at 90 °C for 8 hours. Then Lawessons reagent (1.5 equiv) was added and the mixture was again stirred at 90 °C for 6 hours. The solvent toluene was removed under vacuo and the crude reaction mixture was poured into water and extracted with ethylacetate (25 mL x 2). The organic layer was then washed with brine and dried over anhydrous Na<sub>2</sub>SO<sub>4</sub>. The solvent was removed under vacuo and the crude product obtained was purified by silica gel (100-200 mesh) column chromatography using 5% EtOAc in hexane as the eluant to afford spiro-pyrazolones **4**.

### **2.5 General procedure for the two-steps synthesis of spiro-pyrazolone derivatives 4**

A mixture of olefinic product (**3**, 0.5 mmol) and Lawesson's reagent (1.0 equiv) was refluxed for 6 hours using toluene (5.0 mL) as the solvent. The solvent was removed under vacuo and the crude reaction mixture was poured into water and extracted with ethylacetate (25 mL x 2). The organic layer was then washed with brine and dried over anhydrous Na<sub>2</sub>SO<sub>4</sub>. The solvent was removed under vacuo and the crude product obtained was purified by silica gel (100-200 mesh) column chromatography using 5% EtOAc in hexane as the eluent to afford spiro-pyrazolones **4**.

## **3. Transformation of spiro-pyrazolone 3aa**

**(i) Synthesis of 3,4-dimethyl-2,6,7,8,9-pentaphenyl-2,3-diazaspiro[4.4]nona-6,8-dien-1-one (4a) and 3,4-dimethyl-2,6,7,8,9-pentaphenyl-2,3-diazaspiro[4.4]non-6-en-1-one (4b):**

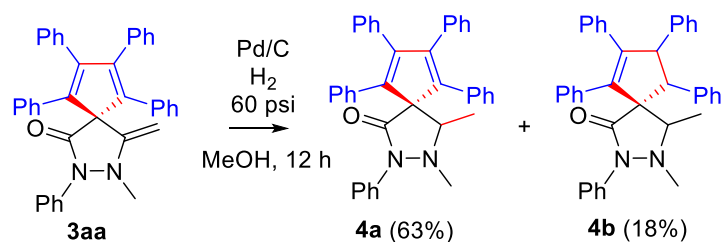

**Scheme SI-2**

To a stirred solution of **3aa** (54 mg, 0.1 mmol) in MeOH (8 mL), Pd/C 10 wt % (5 mg) was added. The reaction mixture was then stirred at room temperature for 12 hours under H<sub>2</sub> (60 psi). After completion of the reaction, the reaction mixture was filtered through a celite pad and the celite pad was washed with methanol (20 mL). The solvent was removed under vacuo and the crude product obtained was purified by silica gel (100-200 mesh) column chromatography using 5% hexane in ethyl acetate as the eluent to afford **4a** (34 mg, 63%) and **4b** (10 mg, 18%).

Compound **4a**: White solid. M.p.: 156–159 °C. <sup>1</sup>H NMR (500 MHz, CDCl<sub>3</sub>) δ 7.24–6.90 (m, 25H), 3.24 (q, *J* = 5.5 Hz, 1H), 2.20 (s, 3H), 1.27 (d, *J* = 6.6 Hz, 3H). <sup>13</sup>C NMR (125 MHz, CDCl<sub>3</sub>) δ 167.6, 147.6, 146.9, 143.1, 142.1, 136.1, 135.9, 135.4, 135.0, 130.7, 130.2, 130.1, 128.4, 128.2, 127.5, 127.4, 127.3, 127.1, 126.7, 126.6, 126.2, 124.0, 74.2, 66.1, 29.6, 11.8. HRMS (+ESI) Calcd for C<sub>39</sub>H<sub>33</sub>N<sub>2</sub>O [M+H]<sup>+</sup>: 545.2593; found: 545.2634.

Compound **4b**: White solid. M.p.: 154–156 °C. <sup>1</sup>H NMR (500 MHz, CDCl<sub>3</sub>) δ 7.38–7.35 (m, 2H), 7.23–6.98 (m, 23H), 4.91 (d, *J* = 10.0 Hz, 1H), 3.90 (d, *J* = 10.0 Hz, 1H), 2.98 (q, *J* = 7.9 Hz, 1H), 2.10 (s, 3H), 1.26 (d, *J* = 6.6 Hz, 3H). <sup>13</sup>C NMR (125 MHz, CDCl<sub>3</sub>) δ 169.2, 145.6, 139.8, 139.2, 137.5, 136.4, 136.2, 136.1, 132.1, 131.3, 129.8, 129.4, 128.5, 127.9, 127.6, 127.3, 126.9, 126.8, 126.7, 126.0, 123.8, 70.7, 66.8, 58.2, 57.9, 43.1, 12.4. HRMS (+ESI) Calcd for C<sub>39</sub>H<sub>35</sub>N<sub>2</sub>O [M+H]<sup>+</sup>: 547.2749; found: 547.2817.

(ii) **Synthesis of 3,4-dimethyl-2,6,7,8,9-pentaphenyl-2,3-diazaspiro[4.4]nona-6,8-dien-1-one (4a):**

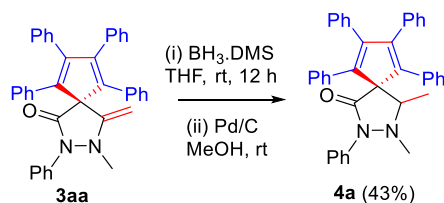

**Scheme SI-3**

To a solution of **3aa** (108 mg, 0.2 mmol) in anhydrous THF, a solution of  $\text{BH}_3 \cdot \text{S}(\text{CH}_3)_2$  (0.2 mL, 2 M solution in THF, 0.4 mmol) was added at 0 °C and the reaction was stirred at room temperature for 12 h. The solvent was removed under vacuo and to the crude product MeOH was added. Then 10 wt % of Pd/C (10 mg) was added into the reaction mixture under nitrogen atmosphere. The reaction mixture was stirred again at room temperature for 24 h. The solvent was removed under vacuo and the crude product obtained was purified by silica gel (100-200 mesh) column chromatography using 5% hexane in ethylacetate as the eluent to afford **4a** (47 mg, 43%).

(iii) Synthesis of **4-(dibromomethylene)-3-methyl-2,6,7,8,9-pentaphenyl-2,3-diazaspiro[4.4]nona-6,8-dien-1-one (4c)**:

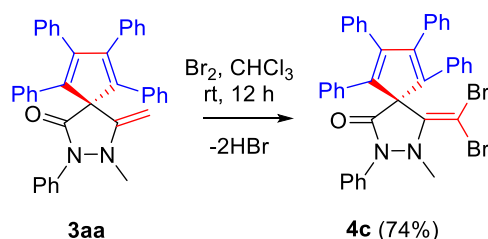

**Scheme SI-4**

To a solution of **3aa** (108 mg, 0.2 mmol) in anhydrous  $\text{CH}_2\text{Cl}_2$ ,  $\text{Br}_2$  (64 mg, 0.40 mmol) was added and then the reaction was continued to stir at room temperature for 12 h. The solvent was removed under vacuo and the crude product obtained was purified by silica gel (100-200 mesh) column chromatography using 2% hexane in EtOAc as the eluent to afford **4c** (103 mg, 74%). Pale yellow solid. M.p.: 159-162 °C.  $^1\text{H}$  NMR (500 MHz,  $\text{CDCl}_3$ )  $\delta$  7.54 (d,  $J = 8.5$  Hz, 2H), 7.36 (t,  $J = 7.9$  Hz, 2H), 7.20–7.05 (m, 17H), 6.96–6.95 (m, 4H), 2.32 (s, 3H).  $^{13}\text{C}$  NMR (125 MHz,  $\text{CDCl}_3$ )  $\delta$  164.5, 147.9, 145.6, 139.4, 135.4, 134.6, 134.5, 129.7, 129.3, 129.0, 128.1, 127.5, 127.4, 127.0, 126.1, 121.4, 73.9, 41.4, 29.6. HRMS (+ESI) Calcd for  $\text{C}_{39}\text{H}_{29}\text{Br}_2\text{N}_2\text{O}$   $[\text{M}+\text{H}]^+$ : 699.0647; found: 699.0689.

#### 4. Measurement of fluorescence quantum yield ( $\Phi_F$ )

Fluorescence quantum yields ( $\Phi_F$ ) of the compounds were calculated using quinine sulfate (0.5 M  $\text{H}_2\text{SO}_4$  solution) as a standard ( $\Phi = 0.54$ ). Emission spectra of all the compounds were recorded from 360 to 660 nm with excitation at 340 nm. Absorbance (optical density, OD) of all the samples were recorded at 340 nm and quantum yields were calculated according to equation (1), in which  $\Phi_{ref}$  is the quantum yield of the reference,  $A_{sample}$  and  $A_{ref}$  are the areas

under the emission spectra of the dimers and the reference,  $OD_{ref}$  and  $OD_{sample}$  are the absorbances of the reference and the dimers which were measured at the excitation wavelength;  $n_{sample}$  and  $n_{ref}$  are the refractive indices of the dimers and the reference in solution.

$$\Phi F = \Phi_{ref} \left( \frac{A_{sample}}{A_{ref}} \right) \times \left( \frac{OD_{ref}}{OD_{sample}} \right) \times \left( \frac{n_{ref}}{n_{sample}} \right) \quad (1)$$

| Sl. No | Compound   | $\lambda_{max}$ (nm) | $\lambda_{em}$ (nm) | $(\Phi F)^{a,b}$ |
|--------|------------|----------------------|---------------------|------------------|
| 1      | <b>4aa</b> | 347                  | 449                 | 0.48             |
| 2      | <b>4ab</b> | 341                  | 457                 | 0.75             |
| 3      | <b>4ad</b> | 340                  | 450                 | 0.64             |
| 4      | <b>4ca</b> | 340                  | 450                 | 0.52             |
| 5      | <b>4da</b> | 318                  | 450                 | 0.61             |
| 6      | <b>4fa</b> | 340                  | 449                 | 0.30             |
| 7      | <b>4ga</b> | 345                  | 438                 | 0.47             |

<sup>a</sup>Concentration  $2.0 \times 10^{-5}$  M in toluene; <sup>b</sup>All the compounds were excited at 340 nm.

#### Reference:

1. S. Baruah, P. Saikia, G. Duarah and S. Gogoi, *Org. Lett.*, 2018, **20**, 3753–3757.



### Spectral and Analytical Data of 3ba-ka and 3aa-ak:

|                                                                                                                                  |                                                                                                                                                                                                                                                                                                                                                                                                                                                                                                                                                                                                                                                                                                                                                                                                                                                                                                      |
|----------------------------------------------------------------------------------------------------------------------------------|------------------------------------------------------------------------------------------------------------------------------------------------------------------------------------------------------------------------------------------------------------------------------------------------------------------------------------------------------------------------------------------------------------------------------------------------------------------------------------------------------------------------------------------------------------------------------------------------------------------------------------------------------------------------------------------------------------------------------------------------------------------------------------------------------------------------------------------------------------------------------------------------------|
| 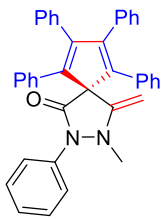 <p style="text-align: center;"><b>3aa</b></p>  | <p><b>3-Methyl-4-methylene-2,6,7,8,9-pentaphenyl-2,3-diazaspiro[4.4]nona-6,8-dien-1-one (3aa):</b> The title compound was prepared by following the general procedure <b>2.3</b> from antipyrine, <b>1a</b> (94 mg, 0.5 mmol) and alkyne <b>2a</b> (178 mg, 1.0 mmol), which was then purified by column chromatography using 5% EtOAc in hexane to afford white solid of <b>3aa</b> (214 mg, 79%). M.p.: 143–145 °C. <sup>1</sup>H NMR (500 MHz, CDCl<sub>3</sub>) δ 7.32–6.96 (m, 25H), 4.50 (s, 2H), 2.46 (s, 3H). <sup>13</sup>C NMR (125 MHz, CDCl<sub>3</sub>) δ 167.0, 150.1, 146.1, 145.0, 136.1, 135.0, 130.4, 130.0, 129.1, 128.2, 127.9, 127.4, 127.2, 126.7, 123.3, 89.4, 74.4, 42.4. HRMS (+ESI) Calcd for C<sub>39</sub>H<sub>31</sub>N<sub>2</sub>O [M+H]<sup>+</sup>: 543.2436; found: 543.2338.</p>                                                                                 |
|  <p style="text-align: center;"><b>3ba</b></p> | <p><b>3-Methyl-4-methylene-6,7,8,9-tetraphenyl-2-(p-tolyl)-2,3-diazaspiro[4.4]nona-6,8-dien-1-one (3ba):</b> The title compound was prepared by following the general procedure <b>2.3</b> from antipyrine <b>1b</b> (101 mg, 0.5 mmol) and alkyne <b>2a</b> (178 mg, 1.0 mmol) which was then purified by column chromatography using 5% EtOAc in hexane to afford brown solid of <b>3ba</b> (181 mg, 65%). M.p.: 91–94 °C. <sup>1</sup>H NMR (500 MHz, CDCl<sub>3</sub>) δ 7.22–7.06 (m, 20H), 6.96 (dd, <i>J</i> = 7.8, 1.5 Hz, 4H), 4.48 (s, 2H), 2.45 (s, 3H), 2.31 (s, 3H). <sup>13</sup>C NMR (125 MHz, CDCl<sub>3</sub>) δ 166.5, 149.9, 145.7, 144.6, 136.5, 134.8, 134.7, 133.2, 130.0, 129.7, 129.4, 127.8, 127.5, 127.1, 126.8, 123.3, 122.3, 88.8, 74.0, 42.0, 21.0. HRMS (+ESI) Calcd for C<sub>40</sub>H<sub>33</sub>N<sub>2</sub>O [M+H]<sup>+</sup>: 557.2592; found: 557.2567.</p> |

|                                                                                                                                   |                                                                                                                                                                                                                                                                                                                                                                                                                                                                                                                                                                                                                                                                                                                                                                                                                                                                                                                                                                                         |
|-----------------------------------------------------------------------------------------------------------------------------------|-----------------------------------------------------------------------------------------------------------------------------------------------------------------------------------------------------------------------------------------------------------------------------------------------------------------------------------------------------------------------------------------------------------------------------------------------------------------------------------------------------------------------------------------------------------------------------------------------------------------------------------------------------------------------------------------------------------------------------------------------------------------------------------------------------------------------------------------------------------------------------------------------------------------------------------------------------------------------------------------|
| 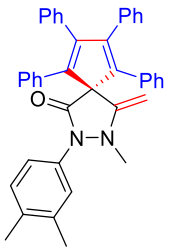 <p style="text-align: center;"><b>3ca</b></p>   | <p><b>2-(3,4-Dimethylphenyl)-3-methyl-4-methylene-6,7,8,9-tetraphenyl-2,3-diazaspiro[4.4]nona-6,8-dien-1-one (3ca):</b> The titled compound was prepared by following the general procedure <b>2.3</b> from antipyryne <b>1c</b> (108 mg, 0.5 mmol) and alkyne <b>2a</b> (178 mg, 1.0 mmol) which was then purified by column chromatography using using 5% EtOAc in hexane afford off white solid of <b>3ca</b> (202 mg, 71 %). M.p.: 80–83 °C. <sup>1</sup>H NMR (500 MHz, CDCl<sub>3</sub>) δ 7.23–7.21 (m, 4H), 7.19–7.15 (m, 6H), 7.13–7.06 (m, 7H), 6.97–6.92 (m, 6H), 4.46 (d, <i>J</i> = 3.9 Hz, 2H), 2.45 (s, 3H), 2.21 (s, 6H). <sup>13</sup>C NMR (125 MHz, CDCl<sub>3</sub>) δ 166.9, 150.3, 146.0, 145.0, 137.5, 135.6, 135.1, 135.0, 133.8, 130.4, 130.1, 128.1, 127.8, 127.4, 127.1, 125.1, 121.4, 88.9, 74.4, 42.2, 20.0, 19.6. HRMS (+ESI) Calcd for C<sub>41</sub>H<sub>35</sub>N<sub>2</sub>O [M+H]<sup>+</sup>: 571.2749; found: 571.2693.</p>                      |
|  <p style="text-align: center;"><b>3da</b></p> | <p><b>2-(4-Isopropylphenyl)-3-methyl-4-methylene-6,7,8,9-tetraphenyl-2,3-diazaspiro[4.4]nona-6,8-dien-1-one (3da):</b> The title compound was prepared by following the general procedure <b>2.3</b> from antipyryne <b>1d</b> (112 mg, 0.5 mmol) and alkyne <b>2a</b> (178 mg, 1.0 mmol) which was then purified by column chromatography using 5% EtOAc in hexane to afford brown solid of <b>3da</b> (199 mg, 70% yield). M.p.: 83–87 °C. <sup>1</sup>H NMR (500 MHz, CDCl<sub>3</sub>) δ 7.23–7.20 (m, 4H), 7.17–7.13 (m, 10H), 7.11–7.06 (m, 6H), 6.97–6.95 (m, 4H), 4.49 (s, 2H), 2.87 (heptet, <i>J</i> = 7.0 Hz, 1H), 2.43 (s, 3H), 1.22 (d, <i>J</i> = 7.0 Hz, 6H). <sup>13</sup>C NMR (125 MHz, CDCl<sub>3</sub>) δ 166.7, 150.3, 147.6, 146.0, 145.0, 135.1, 135.0, 133.6, 130.4, 130.0, 128.1, 127.8, 127.4, 127.1, 123.6, 89.3, 74.3, 42.4, 34.0, 24.2. HRMS (+ESI) Calcd for C<sub>42</sub>H<sub>37</sub>N<sub>2</sub>O [M+H]<sup>+</sup>: 585.2905; found: 585.2861.</p> |
|  <p style="text-align: center;"><b>3ea</b></p> | <p><b>2-(4-Fluorophenyl)-3-methyl-4-methylene-6,7,8,9-tetraphenyl-2,3-diazaspiro[4.4]nona-6,8-dien-1-one (3ea):</b> The title compound was prepared by following the general procedure <b>2.3</b> from antipyryne <b>1e</b> (103 mg, 0.5 mmol) and alkyne <b>2a</b> (178 mg, 1.0 mmol) which was then purified by column chromatography using 5% EtOAc in hexane to afford yellow solid of <b>3ea</b> (179 mg, 64%). M.p.: 95–98 °C. <sup>1</sup>H NMR (500 MHz, CDCl<sub>3</sub>) δ 7.20–7.18 (m, 6H), 7.17–7.06 (m, 12H),</p>                                                                                                                                                                                                                                                                                                                                                                                                                                                         |

|                                                                                                                                   |                                                                                                                                                                                                                                                                                                                                                                                                                                                                                                                                                                                                                                                                                                                                                                                                                                                                                                                                                                                                                                                                            |
|-----------------------------------------------------------------------------------------------------------------------------------|----------------------------------------------------------------------------------------------------------------------------------------------------------------------------------------------------------------------------------------------------------------------------------------------------------------------------------------------------------------------------------------------------------------------------------------------------------------------------------------------------------------------------------------------------------------------------------------------------------------------------------------------------------------------------------------------------------------------------------------------------------------------------------------------------------------------------------------------------------------------------------------------------------------------------------------------------------------------------------------------------------------------------------------------------------------------------|
|                                                                                                                                   | <p>7.02–6.95 (m, 6H), 4.50 (s, 2H), 2.45 (s, 3H). <math>^{13}\text{C}</math> NMR (125 MHz, <math>\text{CDCl}_3</math>) <math>\delta</math> 167.2, 161.8 (d, <math>J = 245.0</math> Hz), 149.8, 145.9, 144.6, 134.8 (d, <math>J = 18.8</math> Hz), 132.0, 130.0 (d, <math>J = 37.5</math> Hz), 129.8, 128.0 (d, <math>J = 37.5</math> Hz), 127.3, 127.0, 125.1, 125.0, 115.9, 115.7 (d, <math>J = 22.5</math> Hz), 89.4, 74.1, 42.2. HRMS (+ESI) Calcd for <math>\text{C}_{39}\text{H}_{30}\text{FN}_2\text{O}</math> <math>[\text{M}+\text{H}]^+</math>: 561.2342; found: 561.2330.</p>                                                                                                                                                                                                                                                                                                                                                                                                                                                                                    |
| 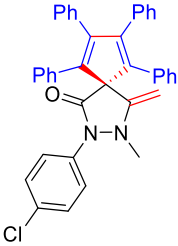 <p style="text-align: center;"><b>3fa</b></p>   | <p><b>2-(4-Chlorophenyl)-3-methyl-4-methylene-6,7,8,9-tetraphenyl-2,3-diazaspiro[4.4]nona-6,8-dien-1-one (3fa):</b> The title compound was prepared by following the general procedure <b>2.3</b> from antipyridine, <b>1f</b> (111 mg, 0.5 mmol) and alkyne <b>2a</b> (178 mg, 1.0 mmol) which was then purified by column chromatography using 5% EtOAc in hexane to afford yellow solid of <b>3fa</b> (181 mg, 63%). M.p.: 113–116 °C. <math>^1\text{H}</math> NMR (500 MHz, <math>\text{CDCl}_3</math>) <math>\delta</math> 7.29–7.26 (m, 2H), 7.23–7.21 (m, 2H), 7.19–7.13 (m, 10H), 7.13–7.06 (m, 6H), 6.96–6.94 (m, 4H), 4.51 (dd, <math>J = 5.0, 2.2</math> Hz, 2H), 2.47 (s, 3H). <math>^{13}\text{C}</math> NMR (125 MHz, <math>\text{CDCl}_3</math>) <math>\delta</math> 167.1, 149.6, 145.9, 144.4, 134.6, 134.5, 134.4, 131.5, 130.0, 129.7, 128.8, 127.8, 127.5, 127.2, 126.9, 123.8, 89.5, 74.0, 42.3. HRMS (+ESI) Calcd for <math>\text{C}_{39}\text{H}_{30}\text{ClN}_2\text{O}</math> <math>[\text{M}+\text{H}]^+</math>: 577.2046; found: 577.2012.</p> |
|  <p style="text-align: center;"><b>3ga</b></p> | <p><b>2-(3-Chlorophenyl)-3-methyl-4-methylene-6,7,8,9-tetraphenyl-2,3-diazaspiro[4.4]nona-6,8-dien-1-one (3ga):</b> The title compound was prepared by following the general procedure <b>2.3</b> from antipyridine, <b>1g</b> (111 mg, 0.5 mmol) and alkyne <b>2a</b> (178 mg, 1.0 mmol) which was then purified by column chromatography using 5% EtOAc in hexane to afford yellow solid of <b>3ga</b> (161 mg, 56%). M.p.: 105–110 °C. <math>^1\text{H}</math> NMR (500 MHz, <math>\text{CDCl}_3</math>) <math>\delta</math> 7.26–7.19 (m, 4H), 7.19–7.07 (m, 16H), 6.96–6.94 (m, 4H), 4.52 (dd, <math>J = 10.0, 2.0</math> Hz, 2H), 2.49 (s, 3H). <math>^{13}\text{C}</math> NMR (125 MHz, <math>\text{CDCl}_3</math>) <math>\delta</math> 167.7, 149.8, 146.2, 144.7, 137.4, 134.8, 134.7, 130.3, 130.0, 128.2, 127.9, 127.5, 127.2, 126.5, 122.6, 120.9, 89.9, 74.4, 42.7. HRMS (+ESI) Calcd for <math>\text{C}_{39}\text{H}_{30}\text{ClN}_2\text{O}</math> <math>[\text{M}+\text{H}]^+</math>: 577.2046; found: 577.2013.</p>                                      |

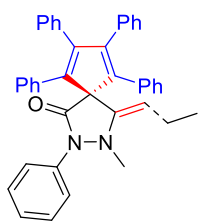

**3ha**

**(E)-3-Methyl-2,6,7,8,9-pentaphenyl-4-propylidene-2,3-diazaspiro[4.4]nona-6,8-dien-1-one and (Z)-3-methyl-2,6,7,8,9-pentaphenyl-4-propylidene-2,3-diazaspiro[4.4]nona-6,8-dien-1-one (3ha, E:Z = 3:1):** The title compound was prepared by following the general procedure **2.3** from antipyrine **1h** (108 mg, 0.5 mmol) and alkyne **2a** (178 mg, 1.0 mmol) which was then purified by column chromatography using 5% EtOAc in hexane to afford white solid of **3ha** (188 mg, 66%). M.p.: 156–160 °C. <sup>1</sup>H NMR (500 MHz, CDCl<sub>3</sub>) δ 7.60–7.30 (m, 4H), 7.22–7.05 (m, 17H), 6.98–6.94 (m, 4H), 4.98 (t, *J* = 7.4 Hz, 0.75H), 4.85 (t, *J* = 7.5 Hz, 0.25H), 2.37 (s, 2.25H), 2.18 (t, *J* = 7.5 Hz, 1.5H), 2.12 (t, *J* = 7.5 Hz, 0.5H), 2.08 (s, 0.75H), 1.00 (t, *J* = 6.5 Hz, 2.25H), 0.96 (t, *J* = 6.5 Hz, 0.75H). <sup>13</sup>C NMR (125 MHz, CDCl<sub>3</sub>) δ 166.5, 166.1, 146.1, 145.4, 145.0, 143.0, 141.0, 139.9, 136.1, 135.2, 135.0, 134.9, 134.8, 130.0, 129.8, 129.7, 129.5, 128.7, 127.8, 127.6, 127.5, 127.1, 127.0, 126.8, 126.7, 126.0, 125.6, 122.4, 121.7, 112.6, 111.5, 73.6, 44.0, 42.9, 20.3, 18.9, 14.4, 13.9. HRMS (+ESI) Calcd for C<sub>41</sub>H<sub>35</sub>N<sub>2</sub>O [M+H]<sup>+</sup>: 571.2749; found: 571.2753.

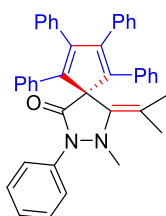

**3ia**

**3-Methyl-2,6,7,8,9-pentaphenyl-4-(propan-2-ylidene)-2,3-diazaspiro[4.4]nona-6,8-dien-1-one (3ia):** The title compound was prepared by following the general procedure **2.3** from antipyrine, **1i** (108 mg, 0.5 mmol) and alkyne **2a** (178 mg, 1.0 mmol) which was then purified by column chromatography using 5% EtOAc in hexane to afford yellow solid of **3ia** (177 mg, 62%). M.p.: 156–159 °C. <sup>1</sup>H NMR (500 MHz, CDCl<sub>3</sub>) δ 7.65 (d, *J* = 7.6 Hz, 2H), 7.34 (t, *J* = 7.9 Hz, 2H), 7.25–7.05 (m, 17H), 6.95 (d, *J* = 6.8 Hz, 4H), 2.0 (s, 3H), 1.73 (s, 3H), 1.71 (s, 3H). <sup>13</sup>C NMR (125 MHz, CDCl<sub>3</sub>) δ 166.2, 145.7, 143.6, 136.3, 135.0, 129.8, 129.4, 128.7, 127.8, 127.5, 127.0, 126.7, 125.4, 121.2, 116.7, 74.9, 43.0, 20.1, 17.9. HRMS (+ESI) Calcd for C<sub>41</sub>H<sub>35</sub>N<sub>2</sub>O [M+H]<sup>+</sup>: 571.2749; found: 571.2784.

|                                                                                                                                   |                                                                                                                                                                                                                                                                                                                                                                                                                                                                                                                                                                                                                                                                                                                                                                                                                                                                                                                                      |
|-----------------------------------------------------------------------------------------------------------------------------------|--------------------------------------------------------------------------------------------------------------------------------------------------------------------------------------------------------------------------------------------------------------------------------------------------------------------------------------------------------------------------------------------------------------------------------------------------------------------------------------------------------------------------------------------------------------------------------------------------------------------------------------------------------------------------------------------------------------------------------------------------------------------------------------------------------------------------------------------------------------------------------------------------------------------------------------|
| 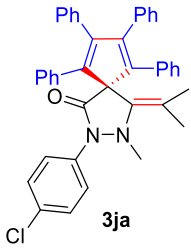 <p style="text-align: center;"><b>3ja</b></p>   | <p><b>2-(4-Chlorophenyl)-3-methyl-6,7,8,9-tetraphenyl-4-(propan-2-ylidene)-2,3-diazaspiro[4.4]nona-6,8-dien-1-one (3ja):</b> The title compound was prepared by following the general procedure <b>2.3</b> from antipyrine <b>1j</b> (125 mg, 0.5 mmol) and alkyne <b>2a</b> (178 mg, 1.0 mmol) which was then purified by column chromatography using 5% EtOAc in hexane to afford yellow solid of <b>3ja</b> (202 mg, 67%). M.p.: 166–170 °C. <sup>1</sup>H NMR (500 MHz, CDCl<sub>3</sub>) δ 7.62–7.60 (m, 2H), 7.31–7.29 (m, 2H), 7.12–7.06 (m, 16H), 6.94 (d, <i>J</i> = 6.9 Hz, 4H), 2.00 (s, 3H), 1.73 (s, 3H), 1.71 (s, 3H). <sup>13</sup>C NMR (125 MHz, CDCl<sub>3</sub>) δ 166.6, 145.8, 143.5, 134.9, 134.7, 130.3, 129.8, 128.8, 127.9, 127.5, 127.1, 126.7, 122.1, 117.2, 74.8, 43.0, 20.1, 17.8. HRMS (+ESI) Calcd for C<sub>41</sub>H<sub>34</sub>ClN<sub>2</sub>O [M+H]<sup>+</sup>: 605.2359; found: 605.2364.</p> |
|  <p style="text-align: center;"><b>3ka</b></p> | <p><b>3-Benzyl-4-methylene-2,6,7,8,9-pentaphenyl-2,3-diazaspiro[4.4]nona-6,8-dien-1-one (3ka):</b> The title compound was prepared by following the general procedure <b>2.3</b> from antipyrine, <b>1k</b> (128 mg, 0.5 mmol) and alkyne <b>2a</b> (178 mg, 1.0 mmol) which was then purified by column chromatography using 5% EtOAc in hexane to afford yellow solid of <b>3ka</b> (238 mg, 77%). M.p.: 191–193 °C. <sup>1</sup>H NMR (500 MHz, CDCl<sub>3</sub>) δ 7.29–7.04 (m, 26H), 7.00–6.94 (m, 4H), 4.34 (d, <i>J</i> = 2.0 Hz, 1H), 4.15 (d, <i>J</i> = 2.0 Hz, 1H), 3.81 (s, 2H). <sup>13</sup>C NMR (125 MHz, CDCl<sub>3</sub>) δ 166.9, 148.6, 145.7, 144.4, 136.7, 135.8, 134.7, 134.6, 130.0, 129.8, 128.8, 128.3, 127.9, 127.8, 127.5, 127.2, 126.8, 126.6, 123.5, 89.7, 74.5, 59.0. HRMS (+ESI) Calcd for C<sub>45</sub>H<sub>35</sub>N<sub>2</sub>O [M+H]<sup>+</sup>: 619.2749; found: 619.2725.</p>             |

|                                                                                                                                   |                                                                                                                                                                                                                                                                                                                                                                                                                                                                                                                                                                                                                                                                                                                                                                                                                                                                                                                                                                                                                                                                                        |
|-----------------------------------------------------------------------------------------------------------------------------------|----------------------------------------------------------------------------------------------------------------------------------------------------------------------------------------------------------------------------------------------------------------------------------------------------------------------------------------------------------------------------------------------------------------------------------------------------------------------------------------------------------------------------------------------------------------------------------------------------------------------------------------------------------------------------------------------------------------------------------------------------------------------------------------------------------------------------------------------------------------------------------------------------------------------------------------------------------------------------------------------------------------------------------------------------------------------------------------|
| 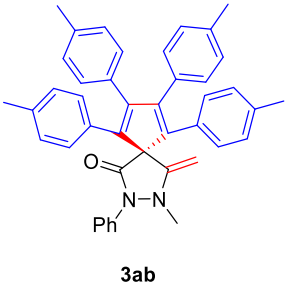 <p style="text-align: center;"><b>3ab</b></p>   | <p><b>3-Methyl-4-methylene-2-phenyl-6,7,8,9-tetra-<i>p</i>-tolyl-2,3-diazaspiro[4.4]nona-6,8-dien-1-one (3ab):</b> The title compound was prepared by following the general procedure <b>2.3</b> from antipyryne <b>1a</b> (94 mg, 0.5 mmol) and alkyne <b>2b</b> (206 mg, 1.0 mmol) which was then purified by column chromatography using 5% EtOAc in hexane to afford yellow solid of <b>3ab</b> (227 mg, 76%). M.p.: 112–115 °C. <sup>1</sup>H NMR (500 MHz, CDCl<sub>3</sub>) δ 7.33–7.32 (m, 3H), 7.19–7.16 (m, 2H), 7.08 (d, <i>J</i> = 8.1 Hz, 4H), 6.94 (d, <i>J</i> = 8.0 Hz, 4H), 6.89 (d, <i>J</i> = 8.0 Hz, 4H), 6.84 (d, <i>J</i> = 8.2 Hz, 4H), 4.47 (d, <i>J</i> = 2.0 Hz, 1H), 4.46 (d, <i>J</i> = 2.0 Hz, 1H), 2.45 (s, 3H), 2.26 (s, 6H), 2.24 (s, 6H). <sup>13</sup>C NMR (125 MHz, CDCl<sub>3</sub>) δ 167.2, 150.4, 145.4, 144.1, 136.5, 136.2, 135.9, 132.0, 131.9, 129.9, 129.5, 128.7, 128.5, 128.2, 126.1, 122.8, 88.8, 73.8, 42.3, 22.6. HRMS (+ESI) Calcd for C<sub>43</sub>H<sub>39</sub>N<sub>2</sub>O [M+H]<sup>+</sup>: 599.3062; found: 599.3070.</p> |
|  <p style="text-align: center;"><b>3ac</b></p> | <p><b>6,7,8,9-Tetrakis(4-methoxyphenyl)-3-methyl-4-methylene-2-phenyl-2,3-diazaspiro[4.4]nona-6,8-dien-1-one (3ac):</b> The title compound was prepared by following the general procedure <b>2.3</b> from antipyryne, <b>1a</b> (94 mg, 0.5 mmol) and alkyne <b>2c</b> (238 mg, 1.0 mmol) which was then purified by column chromatography using 10% EtOAc in hexane to afford white solid of <b>3ac</b> (232 mg, 70%). M.p.: 198–200 °C. <sup>1</sup>H NMR (500 MHz, CDCl<sub>3</sub>) δ 7.33–7.16 (m, 5H), 7.12 (d, <i>J</i> = 8.8 Hz, 4H), 6.87 (d, <i>J</i> = 8.8 Hz, 4H), 6.69 (d, <i>J</i> = 8.8 Hz, 4H), 6.64 (d, <i>J</i> = 8.7 Hz, 4H), 4.46 (d, <i>J</i> = 11.3 Hz, 2H), 3.73 (s, 12H), 2.50 (s, 3H). <sup>13</sup>C NMR (125 MHz, CDCl<sub>3</sub>) δ 167.7, 158.7, 158.5, 150.9, 144.9, 143.6, 136.2, 131.7, 131.2, 129.0, 127.8, 127.7, 126.5, 123.1, 113.6, 113.3, 89.0, 74.0, 55.2, 42.7. HRMS (+ESI) Calcd for C<sub>43</sub>H<sub>39</sub>N<sub>2</sub>O<sub>5</sub> [M+H]<sup>+</sup>: 663.2858; found: 663.2833.</p>                                               |

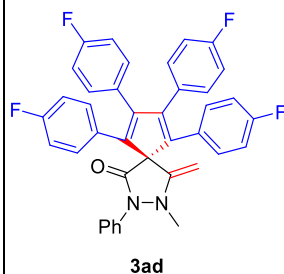

**6,7,8,9-Tetrakis(4-fluorophenyl)-3-methyl-4-methylene-2-phenyl-2,3-diazaspiro[4.4]nona-6,8-dien-1-one (3ad):** The title compound was prepared by following the general procedure **2.3** from antipyryne, **1a** (94 mg, 0.5 mmol) and alkyne **2d** (214 mg, 1.0 mmol) which was then purified by column chromatography using 7% EtOAc in hexane to afford white solid of **3ad** (203 mg, 66%). M.p.: 190–194 °C. <sup>1</sup>H NMR (500 MHz, CDCl<sub>3</sub>) δ 7.33 (t, *J* = 7.8 Hz, 2H), 7.24–7.14 (m, 7H), 6.91–6.85 (m, 8H), 6.80 (t, *J* = 8.7 Hz, 4H), 4.52 (s, 1H), 4.44 (s, 1H), 2.51 (s, 3H). <sup>13</sup>C NMR (125 MHz, CDCl<sub>3</sub>) δ 166.5, 163.3 (d, *J* = 246.3 Hz), 162.1 (d, *J* = 246.3 Hz), 149.6, 144.9, 144.1, 135.8, 132.0, 131.9, 131.7, 130.6 (d, *J* = 2.5 Hz), 129.2, 127.0, 123.1, 115.5, 115.2 (d, *J* = 22.5 Hz), 115.2, 89.6, 74.5, 42.4. HRMS (+ESI) Calcd for C<sub>39</sub>H<sub>27</sub>F<sub>4</sub>N<sub>2</sub>O [M+H]<sup>+</sup>: 615.2059; found: 615.2382.

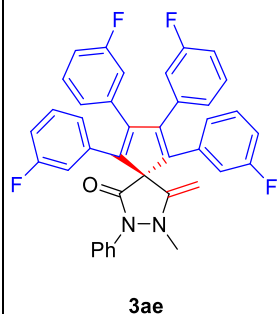

**6,7,8,9-Tetrakis(3-fluorophenyl)-3-methyl-4-methylene-2-phenyl-2,3-diazaspiro[4.4]nona-6,8-dien-1-one (3ae):** The title compound was prepared by following the general procedure **2.3** from antipyryne, **1a** (94 mg, 0.5 mmol) and alkyne **2e** (214 mg, 1.0 mmol) which was then purified by column chromatography using 7% EtOAc in hexane to afford white solid of **3ae** (224 mg, 73%). M.p.: 85-88 °C. <sup>1</sup>H NMR (500 MHz, CDCl<sub>3</sub>) δ 7.37–7.33 (m, 2H), 7.29–7.29 (m, 2H), 7.21 (t, *J* = 8.8 Hz, 1H), 7.16–7.08 (m, 4H), 6.99–6.85 (m, 8H), 6.75–6.73 (m, 2H), 6.68–6.65 (m, 2H), 4.56 (d, *J* = 2.4 Hz, 1H), 4.46 (d, *J* = 2.3 Hz, 1H), 2.53 (s, 3H). <sup>13</sup>C NMR (125 MHz, CDCl<sub>3</sub>) δ 171.1, 162.3 (d, *J* = 244.3 Hz), 162.2 (d, *J* = 244.8 Hz), 148.7, 144.8, 144.4, 136.0, 135.9 (d, *J* = 5.5 Hz), 135.8 (d, *J* = 5.5 Hz), 135.3, 129.6 (d, *J* = 8.3 Hz), 129.5 (d, *J* = 8.2 Hz), 128.9, 126.8, 125.5 (d, *J* = 18.6 Hz), 125.4 (d, *J* = 18.6 Hz), 122.9, 116.6 (d, *J* = 22.1 Hz), 116.2 (d, *J* = 22.2 Hz), 114.6 (d, *J* = 7.5 Hz), 114.5 (d, *J* = 7.5 Hz), 89.6, 74.1, 42.1. HRMS (+ESI) Calcd for C<sub>39</sub>H<sub>27</sub>F<sub>4</sub>N<sub>2</sub>O [M+H]<sup>+</sup>: 615.2059; found: 615.2056.

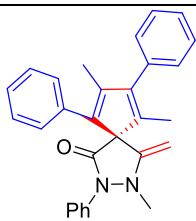

**3af**

**3,6,8-Trimethyl-4-methylene-2,7,9-triphenyl-2,3-**

**diazaspiro[4.4]nona-6,8-dien-1-one (3ag):** The title compound was prepared by following the general procedure **2.3** from antipyrine, **1a** (94 mg, 0.5 mmol) and alkyne **2g** (116 mg, 1.0 mmol) which was then purified by column chromatography using 7% EtOAc in hexane to afford brown gum of **3ag** (121 mg, 58%). <sup>1</sup>H NMR (500 MHz, CDCl<sub>3</sub>) δ 7.46 (dd, *J* = 8.7, 1.1 Hz, 2H), 7.41–7.38 (m, 4H), 7.31–7.30 (m, 7H), 7.25–7.21 (m, 2H), 4.42 (d, *J* = 1.9 Hz, 1H), 4.20 (d, *J* = 1.9 Hz, 1H), 2.66 (s, 3H), 1.89 (s, 6H). <sup>13</sup>C NMR (125 MHz, CDCl<sub>3</sub>) δ 168.2, 151.0, 145.2, 141.9, 141.7, 141.6, 136.1, 135.6, 135.3, 129.5, 129.2, 128.9, 128.1, 127.2, 126.9, 126.3, 122.8, 88.1, 73.1, 42.4, 13.9, 11.5. HRMS (+ESI) Calcd for C<sub>29</sub>H<sub>27</sub>N<sub>2</sub>O [M+H]<sup>+</sup>: 419.2123; found: 419.2127.

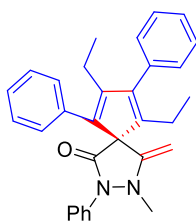

**3ag**

**6,8-Diethyl-3-methyl-4-methylene-2,7,9-triphenyl-2,3-**

**diazaspiro[4.4]nona-6,8-dien-1-one (3ag):** The title compound was prepared by following the general procedure **2.3** from antipyrine, **1a** (94 mg, 0.5 mmol) and alkyne **2h** (130 mg, 1.0 mmol) which was then purified by column chromatography using 5% EtOAc in hexane to afford a gum of **3ah** (123 mg, 55%). <sup>1</sup>H NMR (500 MHz, CDCl<sub>3</sub>) δ 7.40–7.19 (m, 15H), 4.45 (s, 0.75H), 4.35 (s, 0.25H), 4.25 (s, 0.75H), 4.22 (s, 0.25H), 2.58 (s, 2.25H), 2.45–2.35 (m, 1.5H), 2.35–2.30 (m, 1H), 2.29 (s, 0.75H), 2.24–2.27 (m, 1.5H), 1.14 (t, *J* = 10.0 Hz, 1.5H), 0.98 (t, *J* = 10.0 Hz, 2.25H), 0.74 (t, *J* = 10.0 Hz, 2.25H). <sup>13</sup>C NMR (125 MHz, CDCl<sub>3</sub>) δ 167.8, 167.6, 150.5, 149.9, 147.7, 146.9, 143.4, 142.9, 137.5, 136.1, 135.6, 132.9, 129.5, 129.3, 128.9, 128.6, 128.2, 128.0, 127.9, 127.9, 127.0, 126.1, 126.0, 122.9, 122.5, 88.8, 88.2, 74.1, 72.5, 42.3, 42.2, 19.9, 19.6, 14.8, 13.9. HRMS (+ESI) Calcd for C<sub>31</sub>H<sub>31</sub>N<sub>2</sub>O [M+H]<sup>+</sup>: 447.2436; found: 447.2435



|                                                                                                                                   |                                                                                                                                                                                                                                                                                                                                                                                                                                                                                                                                                                                                                                                                                                                                                                                                                                                                                                                                                                                                                                                           |
|-----------------------------------------------------------------------------------------------------------------------------------|-----------------------------------------------------------------------------------------------------------------------------------------------------------------------------------------------------------------------------------------------------------------------------------------------------------------------------------------------------------------------------------------------------------------------------------------------------------------------------------------------------------------------------------------------------------------------------------------------------------------------------------------------------------------------------------------------------------------------------------------------------------------------------------------------------------------------------------------------------------------------------------------------------------------------------------------------------------------------------------------------------------------------------------------------------------|
| 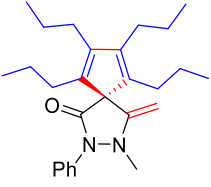 <p style="text-align: center;"><b>3ah</b></p>   | <p><b>3-Methyl-4-methylene-2-phenyl-6,7,8,9-tetrapropyl-2,3-diazaspiro[4.4]nona-6,8-dien-1-one (3ah):</b> The title compound was prepared by following the general procedure <b>2.3</b> from antipyrene, <b>1a</b> (94 mg, 0.5 mmol) and alkyne <b>2h</b> (110 mg, 1.0 mmol) which was then purified by column chromatography using 5% EtOAc in hexane to afford brown gum of <b>3ah</b> (112 mg, 55%). <sup>1</sup>H NMR (500 MHz, CDCl<sub>3</sub>) δ 7.52 (d, <i>J</i> = 8.5 Hz, 2H), 7.41 (t, <i>J</i> = 7.5 Hz, 2H), 7.21 (t, <i>J</i> = 7.0 Hz, 1H), 4.38 (d, <i>J</i> = 1.6 Hz, 1H), 3.93 (d, <i>J</i> = 1.7 Hz, 1H), 2.89 (s, 3H), 2.22–2.18 (m, 8H), 1.47–1.43 (m, 8H), 0.92 (t, <i>J</i> = 7.5 Hz, 6H), 0.83 (t, <i>J</i> = 7.0 Hz, 6H). <sup>13</sup>C NMR (125 MHz, CDCl<sub>3</sub>) δ 169.1, 152.0, 143.9, 142.0, 136.4, 128.8, 125.7, 122.1, 86.8, 70.8, 42.2, 28.0, 23.0, 22.2, 14.6, 14.2. HRMS (+ESI) Calcd for C<sub>27</sub>H<sub>39</sub>N<sub>2</sub>O [M+H]<sup>+</sup>: 407.3062; found: 407.3084.</p>                            |
|  <p style="text-align: center;"><b>3ai</b></p> | <p><b>6,7,8,9-Tetrabutyl-3-methyl-4-methylene-2-phenyl-2,3-diazaspiro[4.4]nona-6,8-dien-1-one (3ai):</b> The title compounds were prepared by following the general procedure <b>2.3</b> from antipyrene, <b>1a</b> (94 mg, 0.5 mmol) and alkyne <b>2i</b> (138 mg, 1.0 mmol) which was then purified by column chromatography using 5% EtOAc in hexane to afford brown gummy of <b>3ai</b> (120 mg, 52%). <sup>1</sup>H NMR (500 MHz, CDCl<sub>3</sub>) δ 7.52 (d, <i>J</i> = 8.5 Hz, 2H), 7.40 (t, <i>J</i> = 7.0 Hz, 2H), 7.20 (t, <i>J</i> = 8.5 Hz, 1H), 4.38 (d, <i>J</i> = 1.6 Hz, 1H), 3.93 (d, <i>J</i> = 1.7 Hz, 1H), 2.9 (s, 3H), 2.27–2.16 (m, 8H), 1.44–1.22 (m, 16H), 0.92 (t, <i>J</i> = 7.5 Hz, 6H), 0.83 (t, <i>J</i> = 7.4 Hz, 6H). <sup>13</sup>C NMR (125 MHz, CDCl<sub>3</sub>) δ 169.3, 152.1, 144.2, 142.0, 136.6, 128.8, 125.8, 122.2, 86.9, 71.0, 42.4, 36.6, 32.3, 31.1, 26.6, 25.8, 23.2, 22.9, 14.0, 13.9. HRMS (+ESI) Calcd for C<sub>31</sub>H<sub>47</sub>N<sub>2</sub>O [M+H]<sup>+</sup>: 463.3688; found: 463.3619.</p> |
|  <p style="text-align: center;"><b>4aa</b></p> | <p><b>4-Methyl-2,6,7,8,9-pentaphenyl-2,3-diazaspiro[4.4]nona-3,6,8-trien-1-one (4aa):</b> To a solution of <b>3aa</b> (100 mg, 0.18 mmol) in anhydrous toluene (20 mL), Lawessons reagent (1.5 equiv) was added. The reaction mixture was then refluxed for 6 hours. The solvent was removed under vacuo and the crude product obtained was purified by silica gel (100–200 mesh) column chromatography using 3% EtOAc</p>                                                                                                                                                                                                                                                                                                                                                                                                                                                                                                                                                                                                                                |

|                                                                                    |                                                                                                                                                                                                                                                                                                                                                                                                                                                                                                                                                                                                                                                                                                                                                                                                                                                                                                                                                                                                                                                                                                                                                                                                                                                                                                                                                                                  |
|------------------------------------------------------------------------------------|----------------------------------------------------------------------------------------------------------------------------------------------------------------------------------------------------------------------------------------------------------------------------------------------------------------------------------------------------------------------------------------------------------------------------------------------------------------------------------------------------------------------------------------------------------------------------------------------------------------------------------------------------------------------------------------------------------------------------------------------------------------------------------------------------------------------------------------------------------------------------------------------------------------------------------------------------------------------------------------------------------------------------------------------------------------------------------------------------------------------------------------------------------------------------------------------------------------------------------------------------------------------------------------------------------------------------------------------------------------------------------|
|                                                                                    | <p>in hexane as the eluent to afford compound <b>4aa</b> (89 mg, 47%). One pot synthesis of <b>4aa</b> has been carried out by following the general procedure <b>2.4</b> from antipyrine, <b>1a</b> (94 mg, 0.5 mmol) and alkyne <b>2a</b> (178 mg, 1.0 mmol), which was then purified by column chromatography using 5% EtOAc in hexane to afford <b>4aa</b> (153 mg, 29%). white solid, m.p.: 211-213 °C. <sup>1</sup>H NMR (500 MHz, CDCl<sub>3</sub>) δ 7.68 (d, <i>J</i> = 8.6 Hz, 2H), 7.35 (t, <i>J</i> = 8.5 Hz, 2H), 7.19–7.09 (m, 13H), 7.03–7.01 (m, 4H), 6.96 (d, <i>J</i> = 8.0 Hz, 4H), 2.06 (s, 3H). <sup>13</sup>C NMR (125 MHz, CDCl<sub>3</sub>) δ 169.6, 158.8, 149.2, 138.0, 137.7, 134.3, 133.5, 129.9, 128.8, 128.5, 128.4, 127.8, 127.6, 127.3, 125.4, 78.5, 14.0. HRMS (+ESI) Calcd for C<sub>38</sub>H<sub>29</sub>N<sub>2</sub>O [M+H]<sup>+</sup>: 529.2274; found: 529.2198.</p>                                                                                                                                                                                                                                                                                                                                                                                                                                                                    |
| 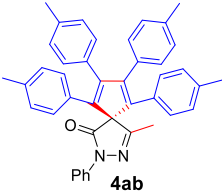 | <p><b>4-Methyl-2-phenyl-6,7,8,9-tetra-p-tolyl-2,3-diazaspiro[4.4]nona-3,6,8-trien-1-one (4ab):</b> To a solution of <b>3ab</b> (100 mg, 0.17 mmol) in anhydrous toluene (20 mL), Lawessons reagent (1.5 equiv) was added. The reaction mixture was then refluxed for 6 hours. The solvent was removed under vacuo and the crude product obtained was purified by silica gel (100-200 mesh) column chromatography using 3% EtOAc in hexane as the eluent to afford compound <b>4ab</b> (89 mg, 45%). One pot synthesis of <b>4ab</b> has been carried out by following the general procedure <b>2.4</b> from antipyrine, <b>1a</b> (94 mg, 0.5 mmol) and alkyne <b>2b</b> (206 mg, 1.0 mmol), which was then purified by column chromatography using 5% EtOAc in hexane to afford <b>4ab</b> (198 mg, 34%). White solid, m.p.: 196-200 °C. <sup>1</sup>H NMR (500 MHz, CDCl<sub>3</sub>) δ 7.72 (dd, <i>J</i> = 8.6, 1.0 Hz, 2H), 7.38–7.35 (m, 2H), 7.18 (t, <i>J</i> = 7.4 Hz, 1H), 7.0–6.88 (m, 12H), 6.88–6.80 (m, 4H), 2.27 (s, 6H), 2.21 (s, 6H), 2.04 (s, 3H). <sup>13</sup>C NMR (125 MHz, CDCl<sub>3</sub>) δ 170.0, 159.5, 148.7, 137.8, 137.2, 137.1, 136.8, 131.5, 130.8, 129.8, 129.0, 128.7, 128.5, 128.3, 125.2, 119.5, 78.3, 21.2, 21.1, 13.9. HRMS (+ESI) Calcd for C<sub>42</sub>H<sub>37</sub>N<sub>2</sub>O [M+H]<sup>+</sup>: 585.2900; found: 585.2627.</p> |

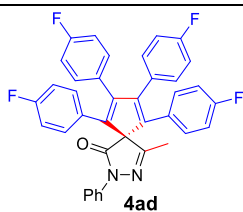

**6,7,8,9-Tetrakis(4-fluorophenyl)-4-methyl-2-phenyl-2,3-**

**diazaspiro[4.4]nona-3,6,8-trien-1-one (4ad):** To a solution of **3ab** (100 mg, 0.17 mmol) in anhydrous toluene (20 mL), Lawessons reagent (1.5 equiv) was added. The reaction mixture was then refluxed for 6 hours. The solvent was removed under vacuo and the crude product obtained was purified by silica gel (100-200 mesh) column chromatography using 3% EtOAc in hexane as the eluant to afford compound **4ad** (85.6 mg, 42%). One pot synthesis of **4ad** has been carried out by following the general procedure **2.4** from antipyrine, **1a** (94 mg, 0.5 mmol) and alkyne **2d** (214 mg, 1.0 mmol), which was then purified by column chromatography using 5% EtOAc in hexane to afford **4ad** (186 mg, 31%). White solid, m.p.: 185-189 °C. <sup>1</sup>H NMR (500 MHz, CDCl<sub>3</sub>) δ 7.67 (d, *J* = 8.5 Hz, 2H), 7.37 (t, *J* = 8.5 Hz, 2H), 7.20 (t, *J* = 7.5 Hz, 1H), 6.99–6.97 (m, 4H), 6.92–6.80 (m, 12H), 2.05 (s, 3H). <sup>13</sup>C NMR (125 MHz, CDCl<sub>3</sub>) δ 169.1, 162.1 (d, *J* = 247.3 Hz), 162.0 (d, *J* = 247.3 Hz), 158.1, 147.8, 137.4, 137.2, 131.6 (d, *J* = 8.0 Hz), 130.1 (d, *J* = 8.1 Hz), 129.6 (d, *J* = 3.3 Hz), 129.6 (d, *J* = 3.5 Hz), 128.9, 125.7, 119.4, 115.7 (d, *J* = 21.4 Hz), 78.5, 14.1. HRMS (+ESI) Calcd for C<sub>38</sub>H<sub>25</sub>F<sub>4</sub>N<sub>2</sub>O [M+H]<sup>+</sup>: 601.1898; found: 601.1717.

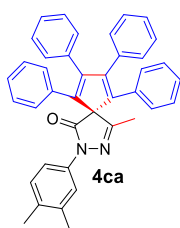

**2-(3,4-Dimethylphenyl)-4-methyl-6,7,8,9-tetraphenyl-2,3-**

**diazaspiro[4.4]nona-3,6,8-trien-1-one (4ca):** To a solution of **3ca** (100 mg, 0.18 mmol) in anhydrous toluene (20 mL), Lawessons reagent (1.5 equiv) was added. The reaction mixture was then refluxed for 6 hours. The solvent was removed under vacuo and the crude product obtained was purified by silica gel (100-200 mesh) column chromatography using 3% EtOAc in hexane as the eluent to afford compound **4ca** (74 mg, 37%). One pot synthesis of **4ca** has been carried out by following the general procedure **2.4** from antipyrine, **1c** (94 mg, 0.5 mmol) and alkyne **2a** (138 mg, 1.0 mmol) which was then purified by column chromatography using 5% EtOAc in hexane to afford **4ca** (155 mg, 28%). Sticky solid. <sup>1</sup>H NMR (400 MHz, CDCl<sub>3</sub>) δ 7.45 (d, *J* = 2.3 Hz,

|                                                                                     |                                                                                                                                                                                                                                                                                                                                                                                                                                                                                                                                                                                                                                                                                                                                                                                                                                                                                                                                                                                                                                                                                                                                                                                                                                                                                                                                                                                                                                                                                                                                                                                                                       |
|-------------------------------------------------------------------------------------|-----------------------------------------------------------------------------------------------------------------------------------------------------------------------------------------------------------------------------------------------------------------------------------------------------------------------------------------------------------------------------------------------------------------------------------------------------------------------------------------------------------------------------------------------------------------------------------------------------------------------------------------------------------------------------------------------------------------------------------------------------------------------------------------------------------------------------------------------------------------------------------------------------------------------------------------------------------------------------------------------------------------------------------------------------------------------------------------------------------------------------------------------------------------------------------------------------------------------------------------------------------------------------------------------------------------------------------------------------------------------------------------------------------------------------------------------------------------------------------------------------------------------------------------------------------------------------------------------------------------------|
|                                                                                     | <p>1H), 7.39 (dd, <math>J = 8.1, 2.4</math> Hz, 1H), 7.19–6.94 (m, 21H), 2.24 (d, <math>J = 6.6</math> Hz, 6H), 2.07 (s, 3H). <math>^{13}\text{C}</math> NMR (125 MHz, <math>\text{CDCl}_3</math>) <math>\delta</math> 169.6, 158.7, 149.3, 138.2, 137.3, 135.7, 134.5, 134.2, 133.7, 130.2, 130.0, 128.7, 128.6, 128.4, 128.0, 127.8, 127.5, 121.1, 117.5, 78.7, 20.0, 19.4, 14.2. HRMS (+ESI) Calcd for <math>\text{C}_{40}\text{H}_{33}\text{N}_2\text{O}</math> <math>[\text{M}+\text{H}]^+</math>: 557.2587; found: 557.2446.</p>                                                                                                                                                                                                                                                                                                                                                                                                                                                                                                                                                                                                                                                                                                                                                                                                                                                                                                                                                                                                                                                                                |
| 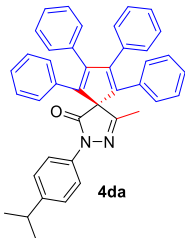  | <p><b>2-(4-Isopropylphenyl)-4-methyl-6,7,8,9-tetraphenyl-2,3-diazaspiro[4.4]nona-3,6,8-trien-1-one (4da):</b> To a solution of <b>3da</b> (100 mg, 0.17 mmol) in anhydrous toluene (20 mL), Lawessons reagent (1.5 equiv) was added. The reaction mixture was then refluxed for 6 hours. The solvent was removed under vacuo and the crude product obtained was purified by silica gel (100-200 mesh) column chromatography using 3% EtOAc in hexane as the eluant to afford compound <b>4da</b> (79 mg, 41%). One pot synthesis of <b>4da</b> has been carried out by following the general procedure <b>2.4</b> from antipyrene, <b>1d</b> (94 mg, 0.5 mmol) and alkyne <b>2a</b> (138 mg, 1.0 mmol) which was then purified by column chromatography using 5% EtOAc in hexane to afford brown gummy of <b>4da</b> (159 mg, 28%). <math>^1\text{H}</math> NMR (400 MHz, <math>\text{CDCl}_3</math>) <math>\delta</math> 7.55 (d, <math>J = 8.6</math> Hz, 2H), 7.21 (d, <math>J = 2.1</math> Hz, 1H), 7.20 (d, <math>J = 1.9</math> Hz, 1H), 7.17 – 7.01 (m, 17H), 6.96 (t, <math>J = 1.5</math> Hz, 2H), 6.94 (d, <math>J = 1.7</math> Hz, 2H), 3.00–2.80 (m, 1H), 2.06 (s, 3H), 1.22 (d, <math>J = 6.9</math> Hz, 6H). <math>^{13}\text{C}</math> NMR (125 MHz, <math>\text{CDCl}_3</math>) <math>\delta</math> 169.7, 158.8, 149.3, 146.4, 138.2, 135.6, 134.5, 133.7, 130.1, 128.7, 128.6, 128.4, 128.0, 127.8, 127.5, 126.9, 120.2, 78.6, 33.8, 24.1, 14.2. HRMS (+ESI) Calcd for <math>\text{C}_{41}\text{H}_{35}\text{N}_2\text{O}</math> <math>[\text{M}+\text{H}]^+</math>: 571.2744; found: 571.2837.</p> |
|  | <p><b>2-(4-Chlorophenyl)-4-methyl-6,7,8,9-tetraphenyl-2,3-diazaspiro[4.4]nona-3,6,8-trien-1-one (4fa):</b> To a solution of <b>3fa</b> (100 mg, 0.17 mmol) in anhydrous toluene (20 mL), Lawessons reagent (1.5 equiv) was added. The reaction mixture was then refluxed for 6 hours. The solvent was removed under vacuo and the crude product obtained was purified by silica gel (100-200 mesh) column chromatography using 3% EtOAc in hexane as the eluant to afford compound <b>4fa</b> (74 mg, 39%). One pot synthesis of <b>4fa</b> has</p>                                                                                                                                                                                                                                                                                                                                                                                                                                                                                                                                                                                                                                                                                                                                                                                                                                                                                                                                                                                                                                                                   |

|                                                                                    |                                                                                                                                                                                                                                                                                                                                                                                                                                                                                                                                                                                                                                                                                                                                                                                                                                                                                                                                                                                                                                                                                                                                                                                                                                                                                              |
|------------------------------------------------------------------------------------|----------------------------------------------------------------------------------------------------------------------------------------------------------------------------------------------------------------------------------------------------------------------------------------------------------------------------------------------------------------------------------------------------------------------------------------------------------------------------------------------------------------------------------------------------------------------------------------------------------------------------------------------------------------------------------------------------------------------------------------------------------------------------------------------------------------------------------------------------------------------------------------------------------------------------------------------------------------------------------------------------------------------------------------------------------------------------------------------------------------------------------------------------------------------------------------------------------------------------------------------------------------------------------------------|
|                                                                                    | <p>been carried out by following the general procedure <b>2.4</b> from antipyrine, <b>1f</b> (94 mg, 0.5 mmol) and alkyne <b>2a</b> (138 mg, 1.0 mmol) which was then purified by column chromatography using 5% EtOAc in hexane to afford <b>4fa</b> (146 mg, 26%). Sticky solid. <sup>1</sup>H NMR (400 MHz, CDCl<sub>3</sub>) δ 7.68 (d, <i>J</i> = 2.2 Hz, 1H), 7.66 (d, <i>J</i> = 2.2 Hz, 1H), 7.27-7.24 (m, 2H), 7.23–6.92 (m, 20H), 2.06 (s, 3H). <sup>13</sup>C NMR (125 MHz, CDCl<sub>3</sub>) δ 169.8, 159.4, 149.5, 138.8, 137.9, 134.5, 134.2, 133.4, 130.1, 129.9, 128.6, 128.5, 127.9, 127.8, 127.5, 125.2, 119.1, 117.0, 78.6, 14.1. HRMS (+ESI) Calcd for C<sub>38</sub>H<sub>28</sub>N<sub>2</sub>OCl [M+H]<sup>+</sup>: 563.1885; found 563.1721.</p>                                                                                                                                                                                                                                                                                                                                                                                                                                                                                                                     |
| 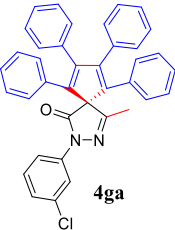 | <p><b>2-(3-Chlorophenyl)-4-methyl-6,7,8,9-tetraphenyl-2,3-diazaspiro[4.4]nona-3,6,8-trien-1-one (4ga):</b> To a solution of <b>3aa</b> (100 mg, 0.17 mmol) in anhydrous toluene (20 mL), Lawessons reagent (1.5 equiv) was added. The reaction mixture was then refluxed for 6 hours. The solvent was removed under vacuo and the crude product obtained was purified by silica gel (100-200 mesh) column chromatography using 3% EtOAc in hexane as the eluant to afford compound <b>4ga</b> (68 mg, 36%). One pot synthesis of <b>4ga</b> has been carried out by following the general procedure <b>2.4</b> from antipyrine, <b>1g</b> (94 mg, 0.5 mmol) and alkyne <b>2a</b> (138 mg, 1.0 mmol) which was then purified by column chromatography using 5% EtOAc in hexane to afford brown gummy of <b>4ga</b> (140 mg, 25%). <sup>1</sup>H NMR (400 MHz, CDCl<sub>3</sub>) δ 7.68 (s, 1H), 7.66 (s, 1H), 7.30 (d, <i>J</i> = 8.9 Hz, 2H), 7.16–7.07 (m, 12H), 6.900–6.92(m, 8H), 2.06 (s, 3H). <sup>13</sup>C NMR (125 MHz, CDCl<sub>3</sub>) δ 169.9, 159.4, 149.4, 138.8, 136.4, 134.3, 133.5, 130.6, 130.0, 128.9, 128.6, 128.0, 127.8, 127.6, 120.6, 78.6, 14.1. HRMS (+ESI) Calcd for C<sub>38</sub>H<sub>28</sub>N<sub>2</sub>OCl [M+H]<sup>+</sup>: 563.1885; found 563.1707.</p> |

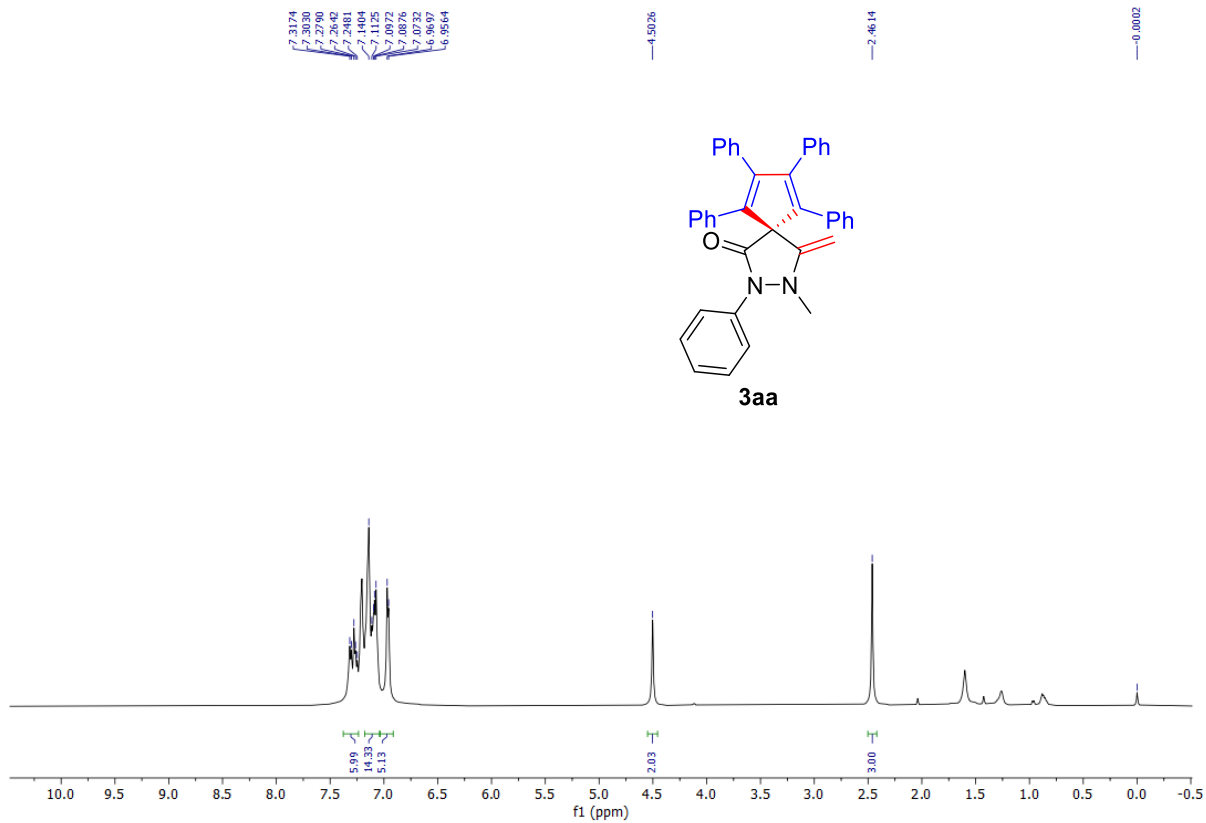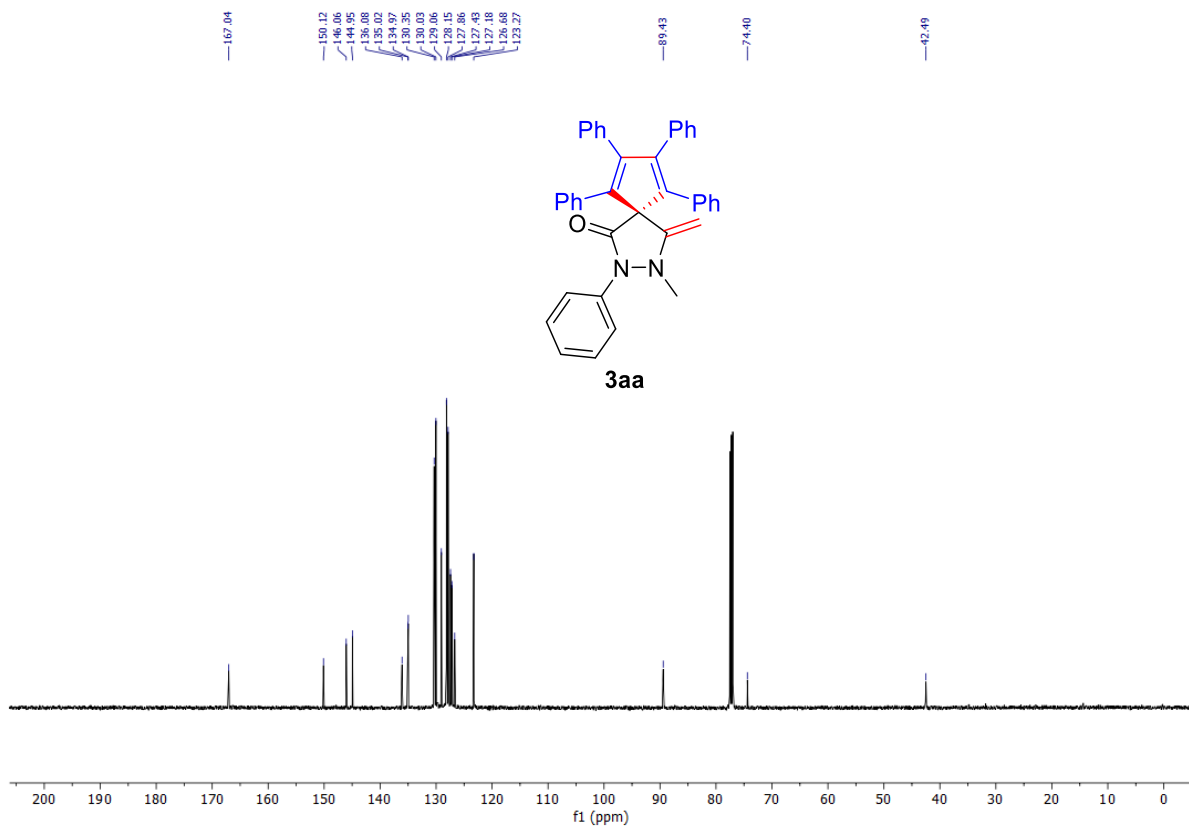

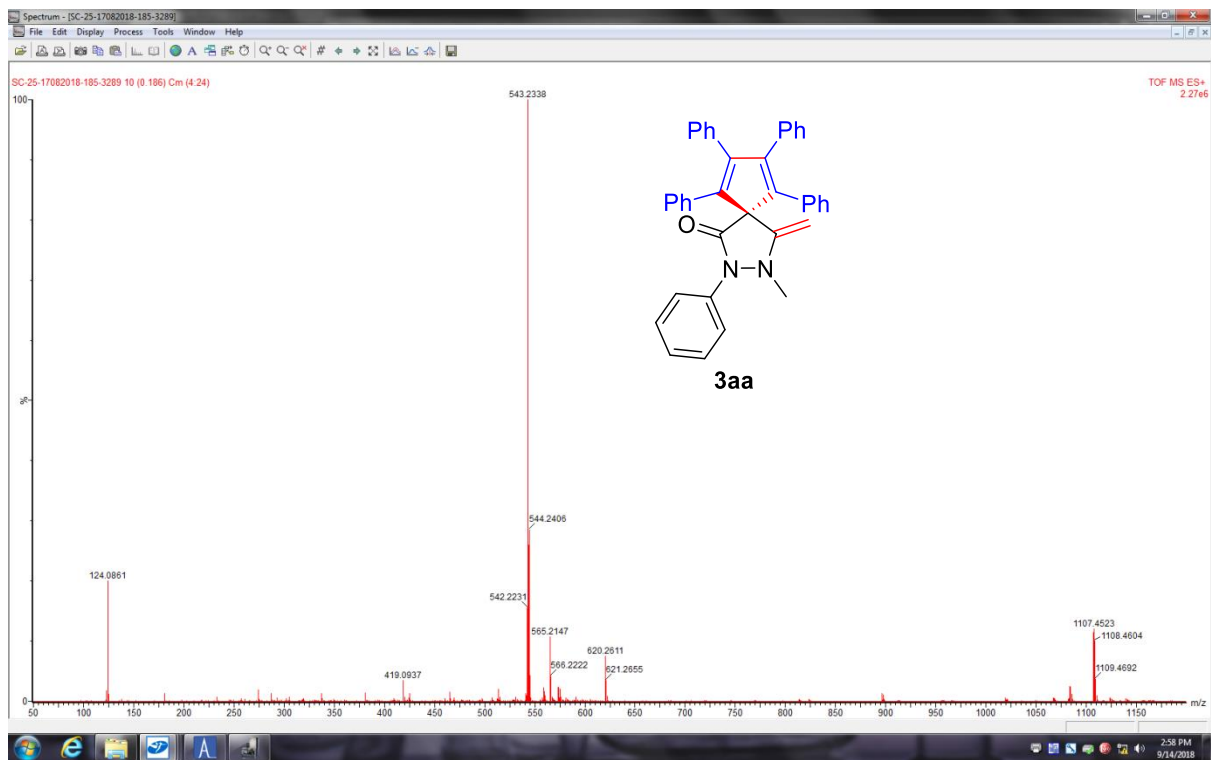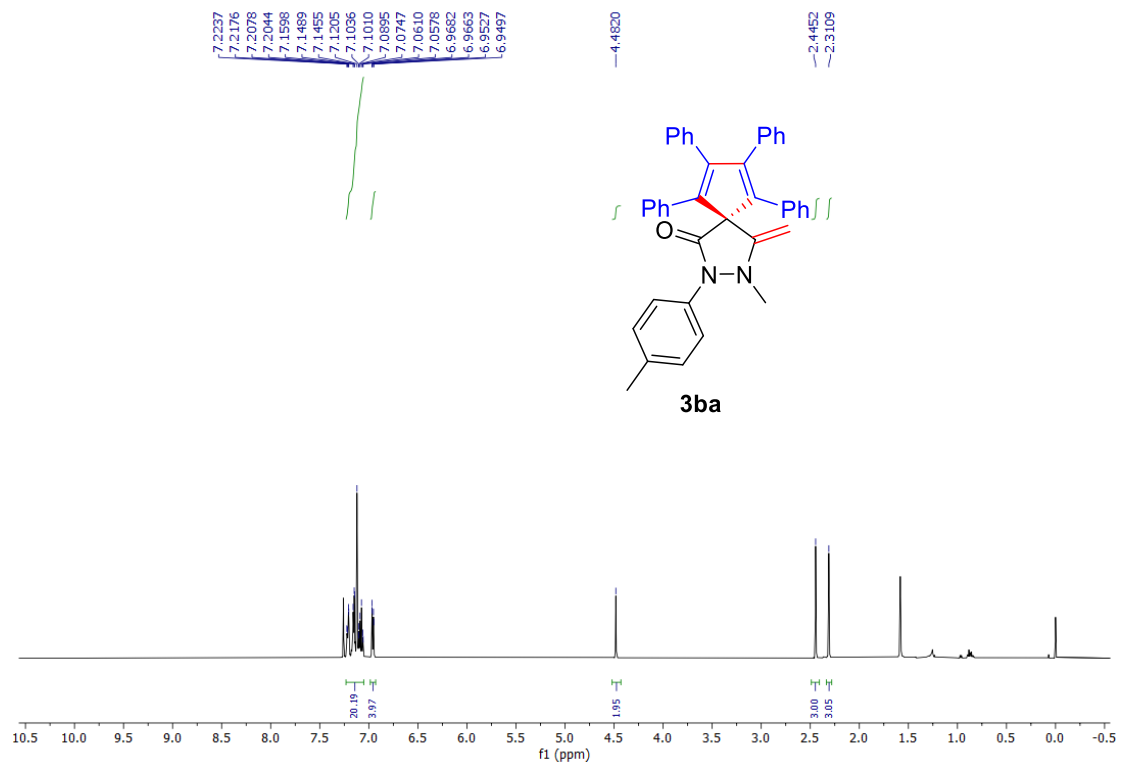

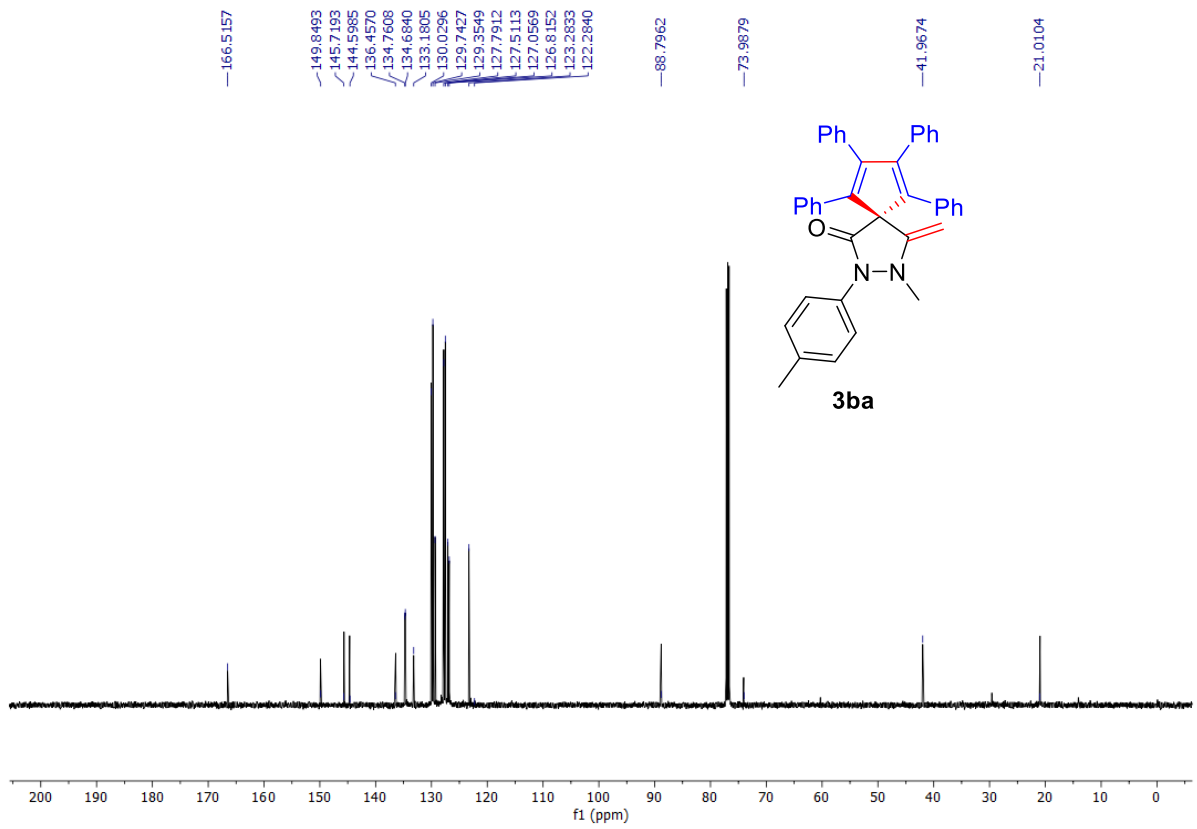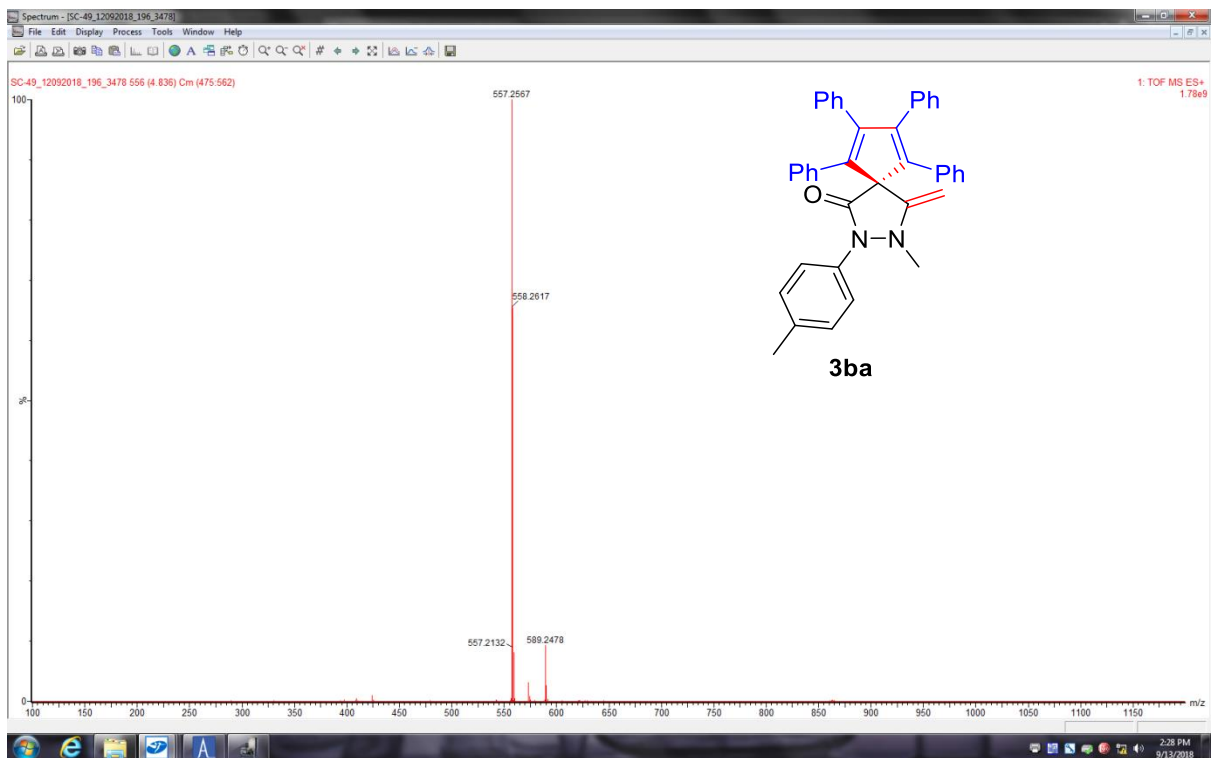



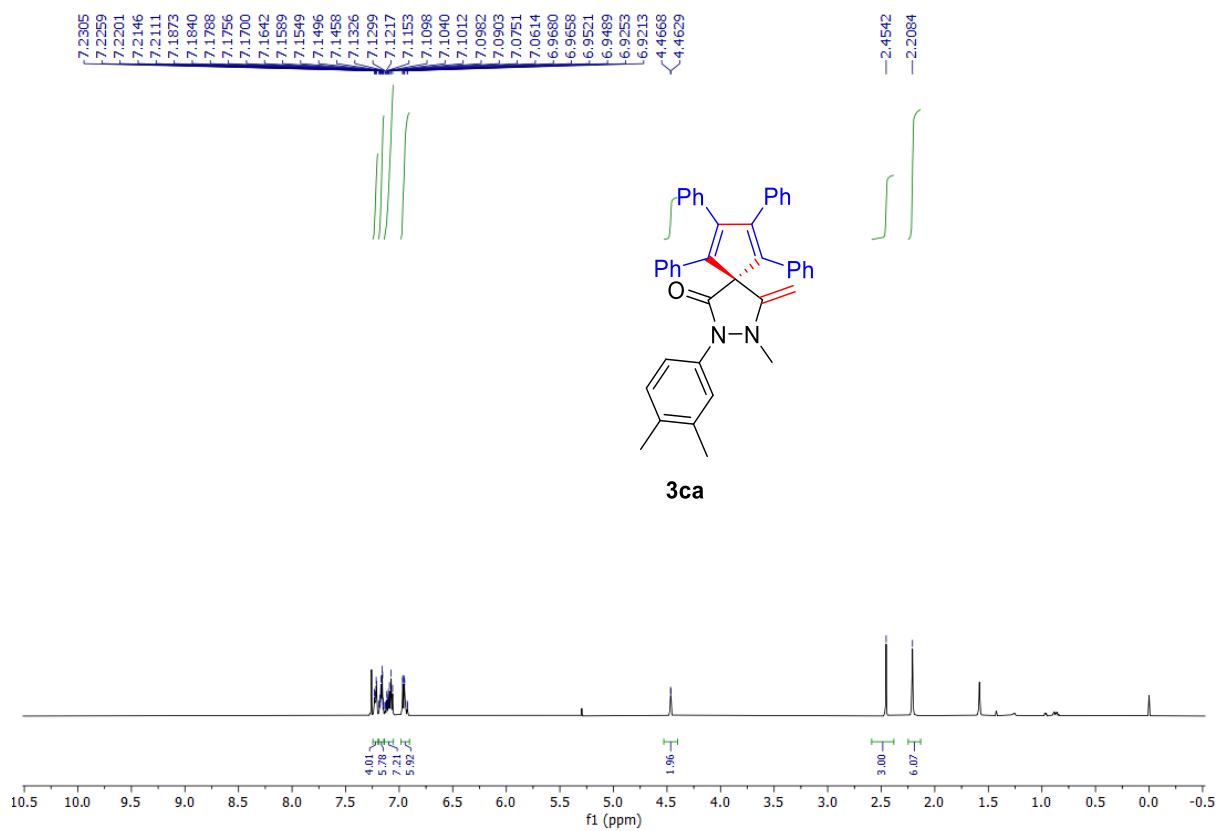

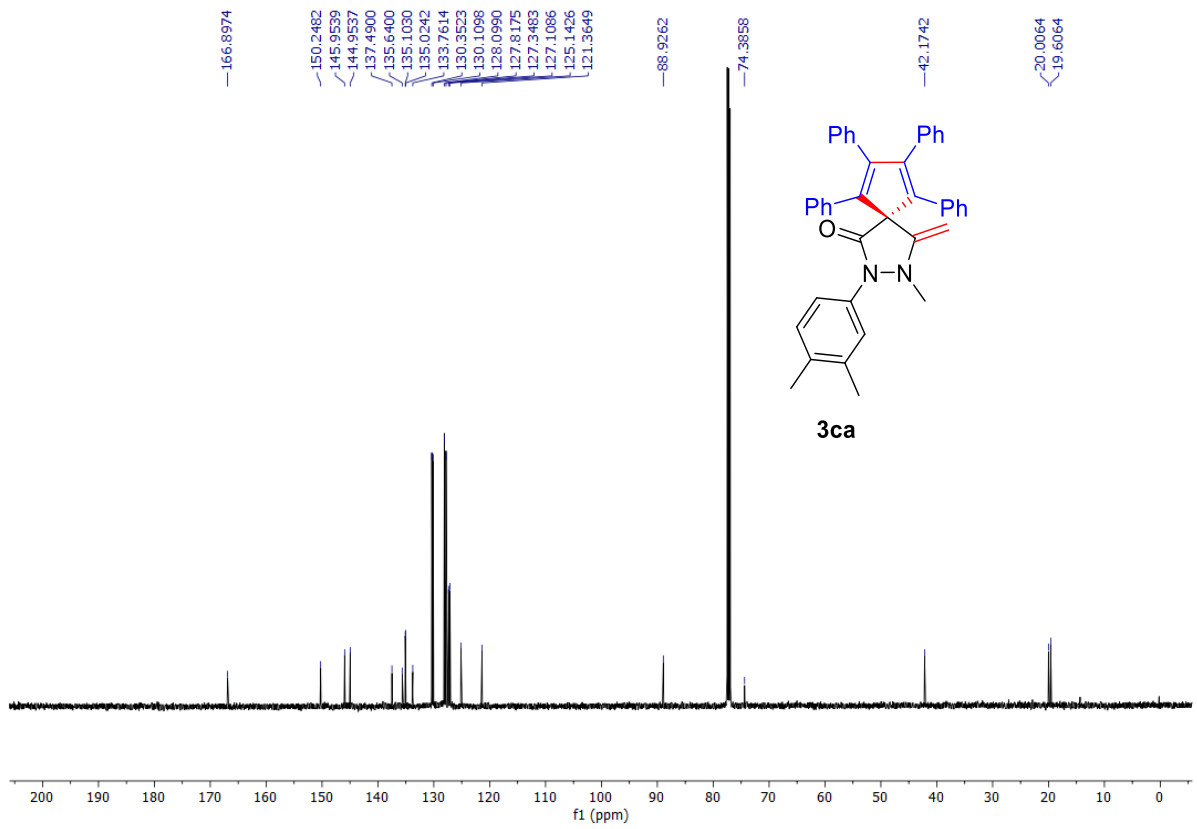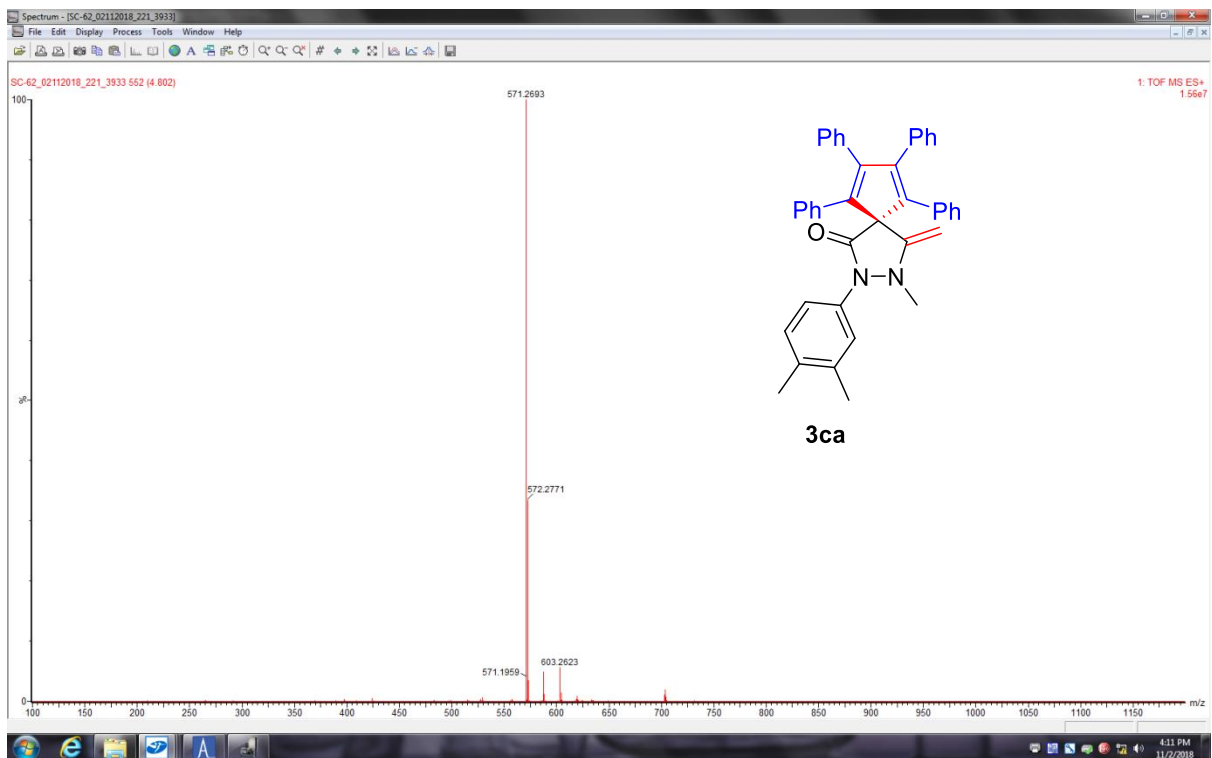

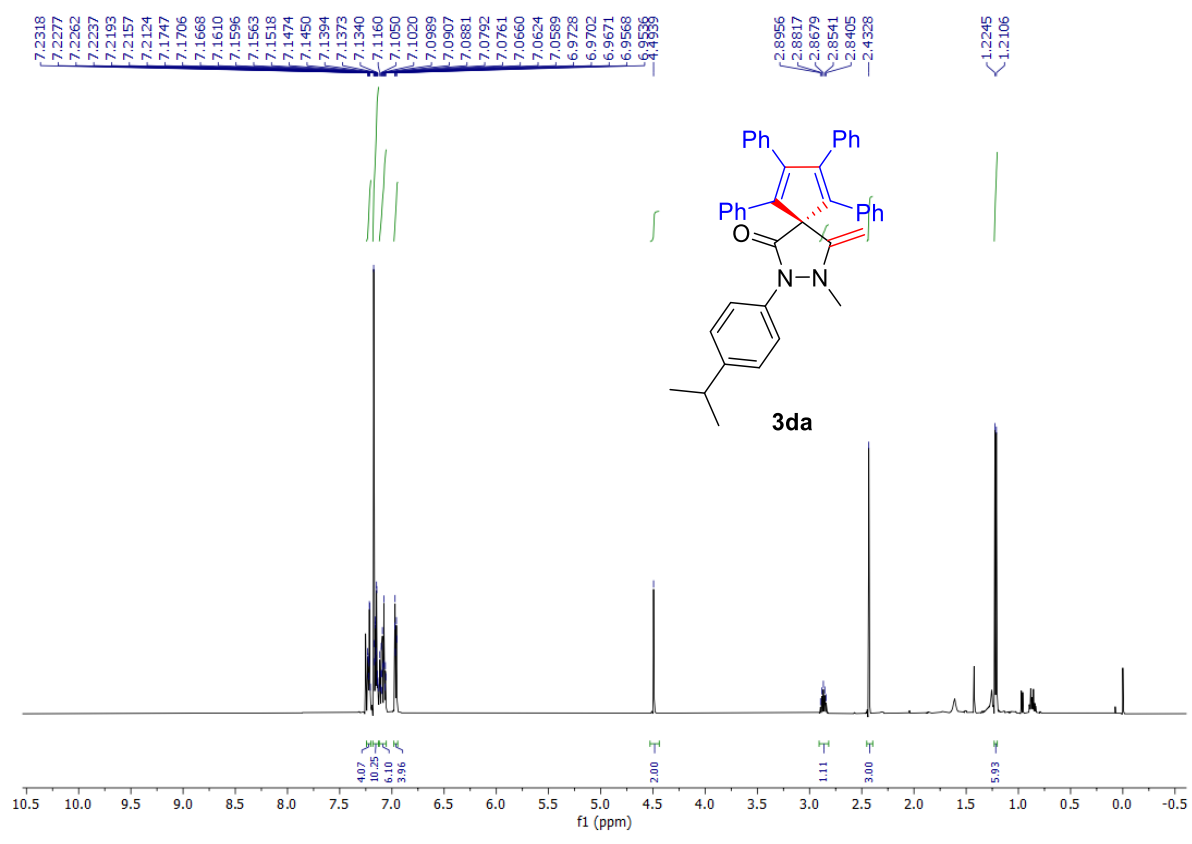

-166.7174  
 150.2543  
 147.5612  
 145.9509  
 145.0403  
 135.0687  
 135.0150  
 133.5939  
 130.9587  
 130.0425  
 128.1328  
 127.8436  
 127.3895  
 127.1429  
 127.1100  
 123.5691  
 -89.2695  
 -74.3357  
 -42.4430  
 -33.9854  
 -27.1254  
 -24.1480  
 -14.3647

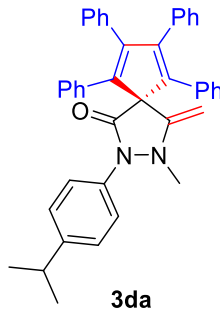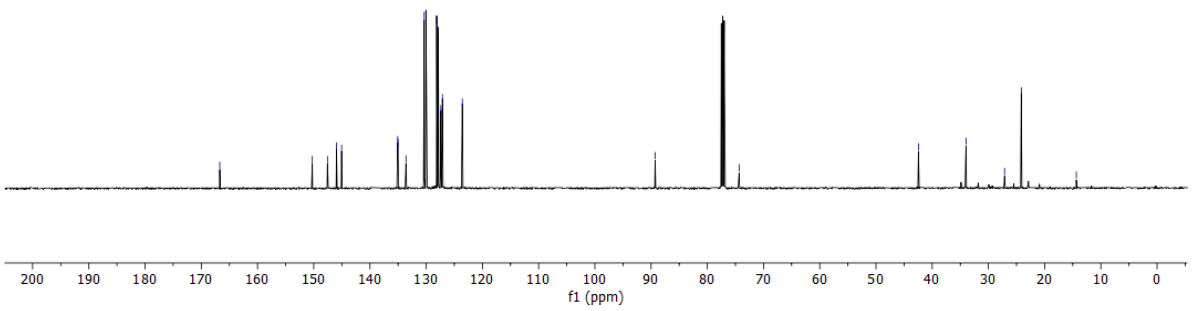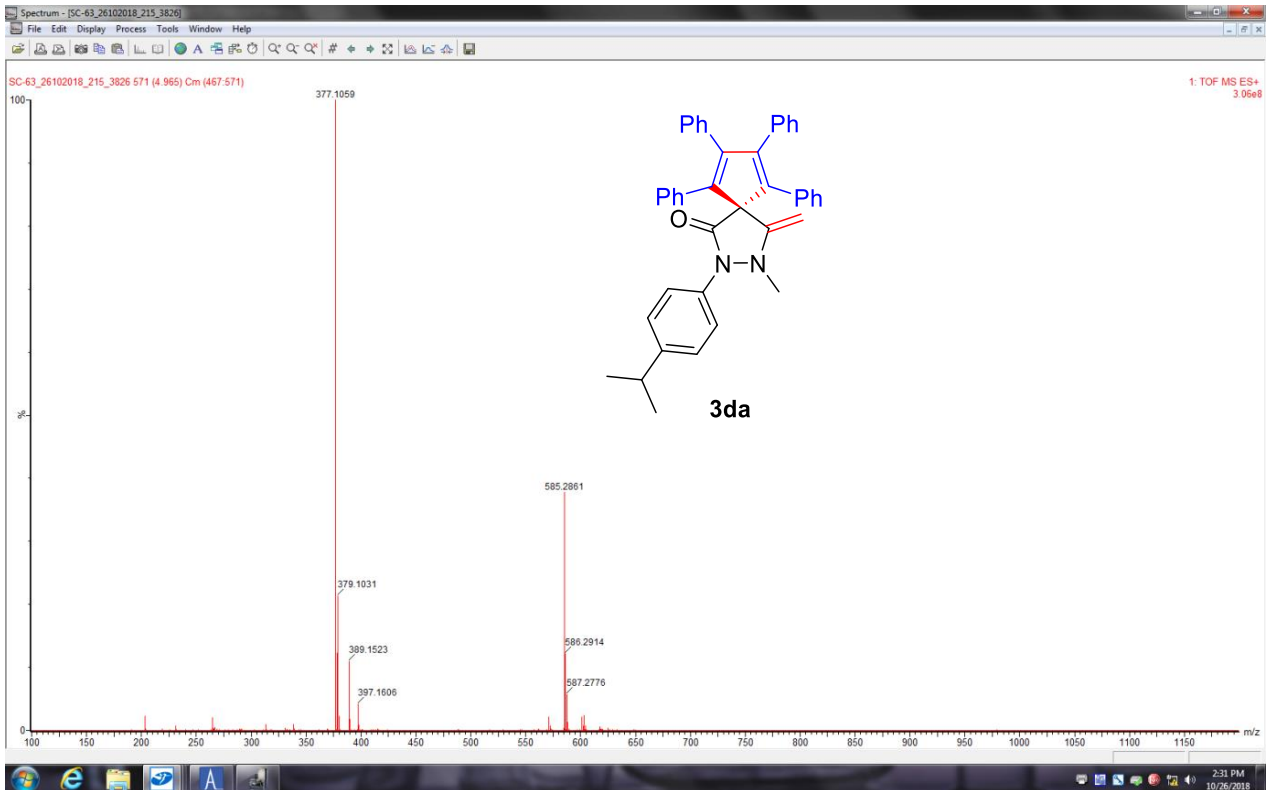

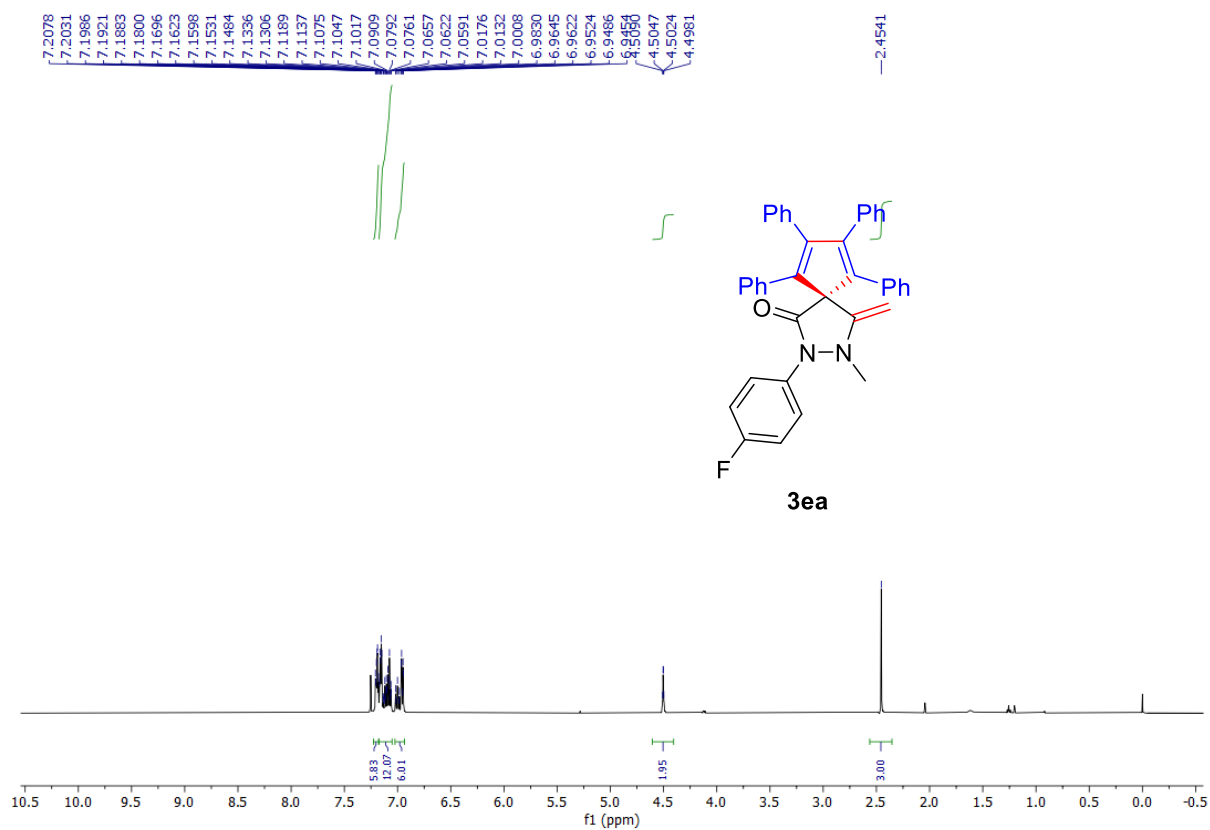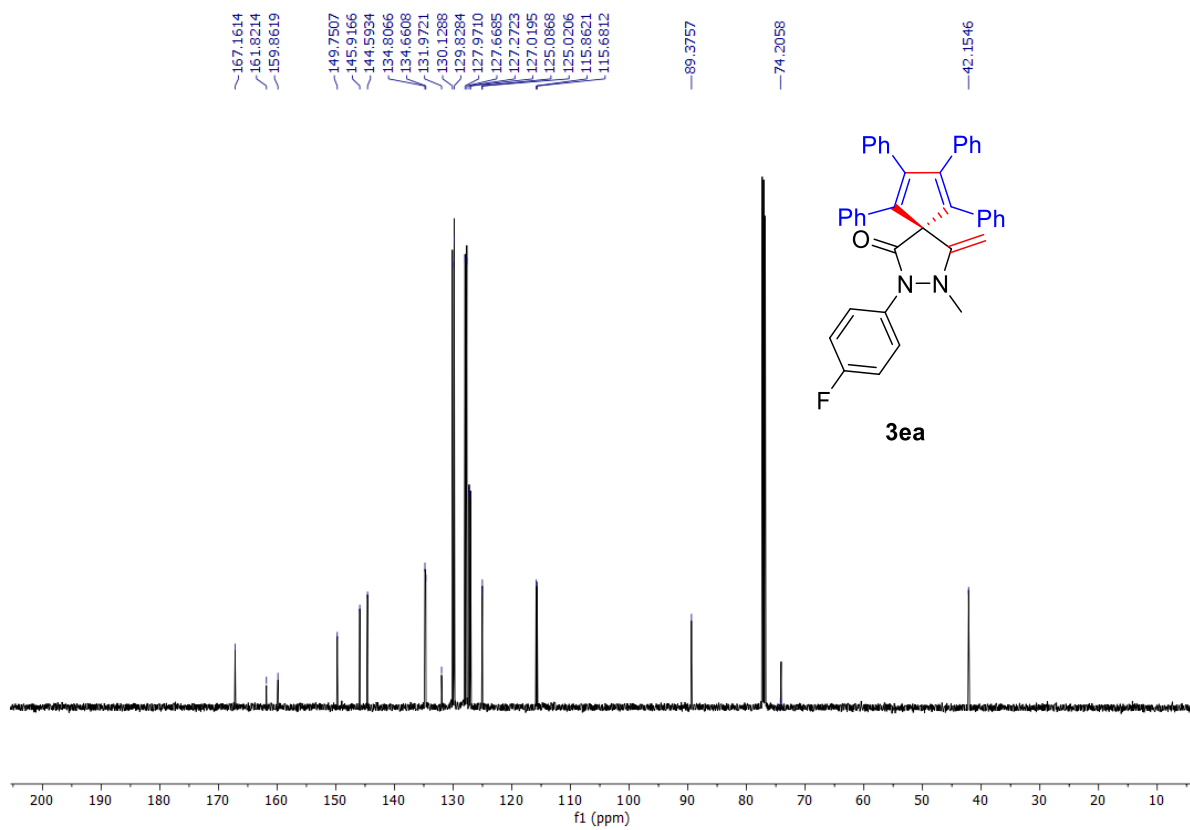

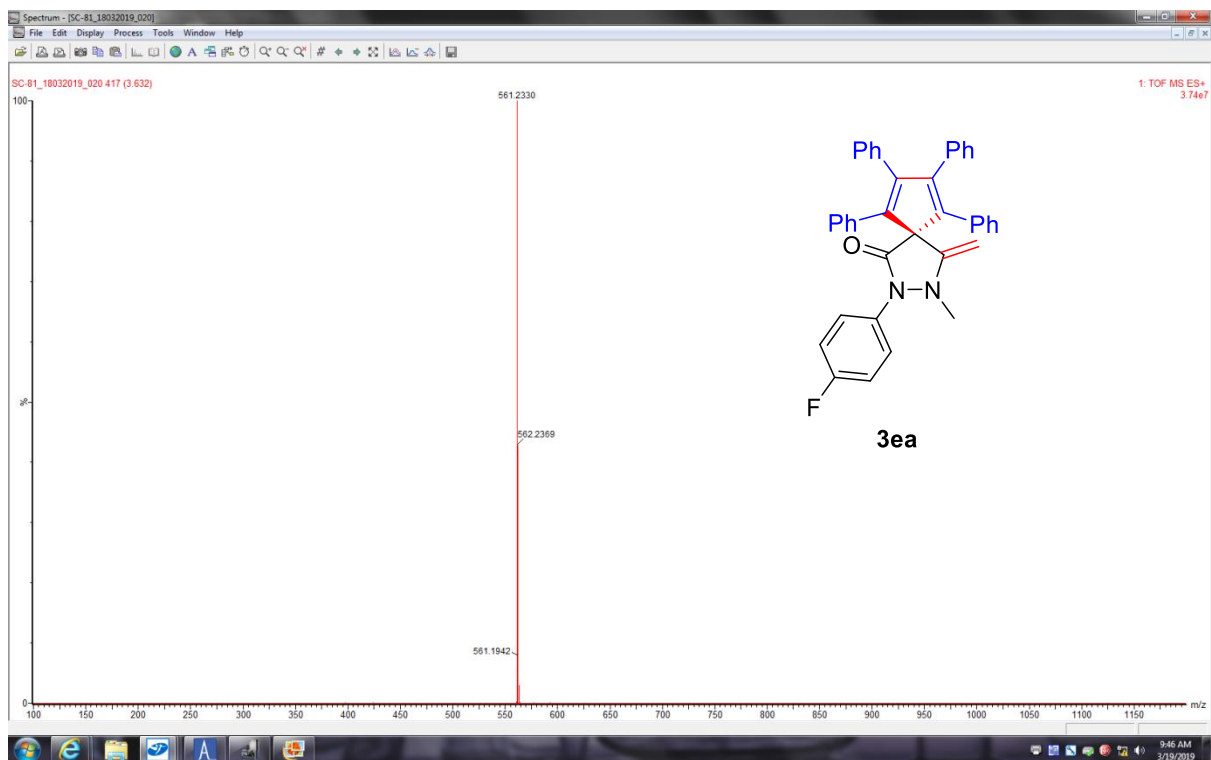

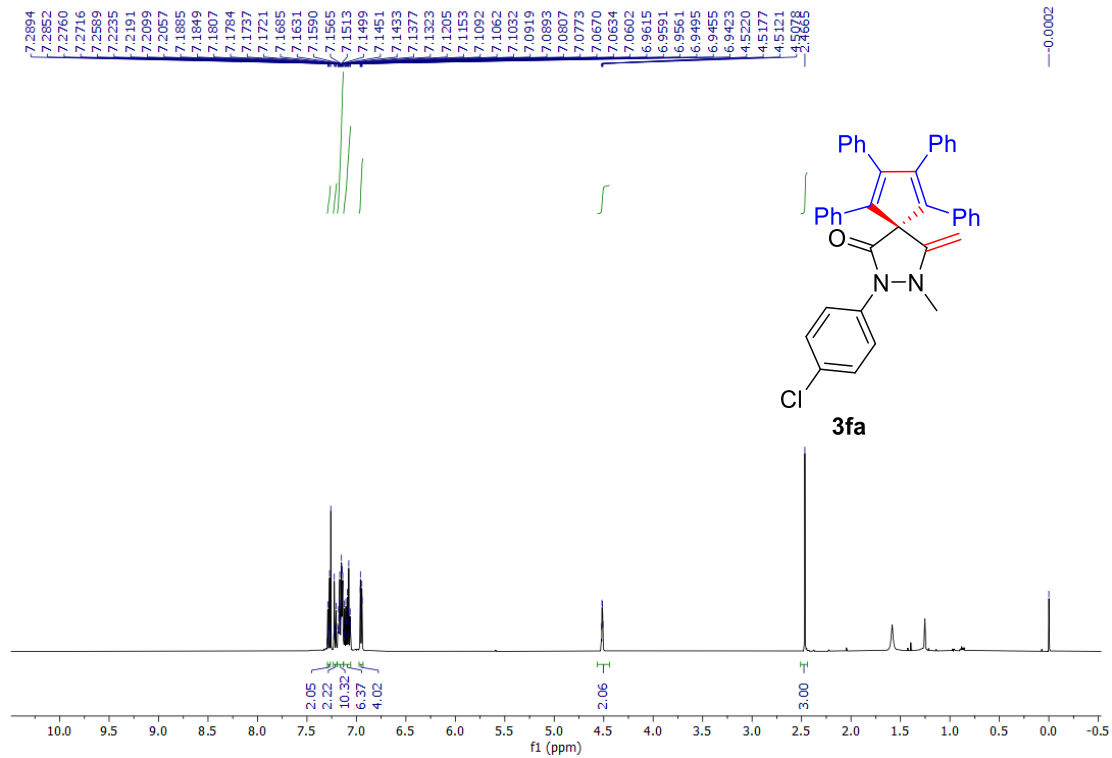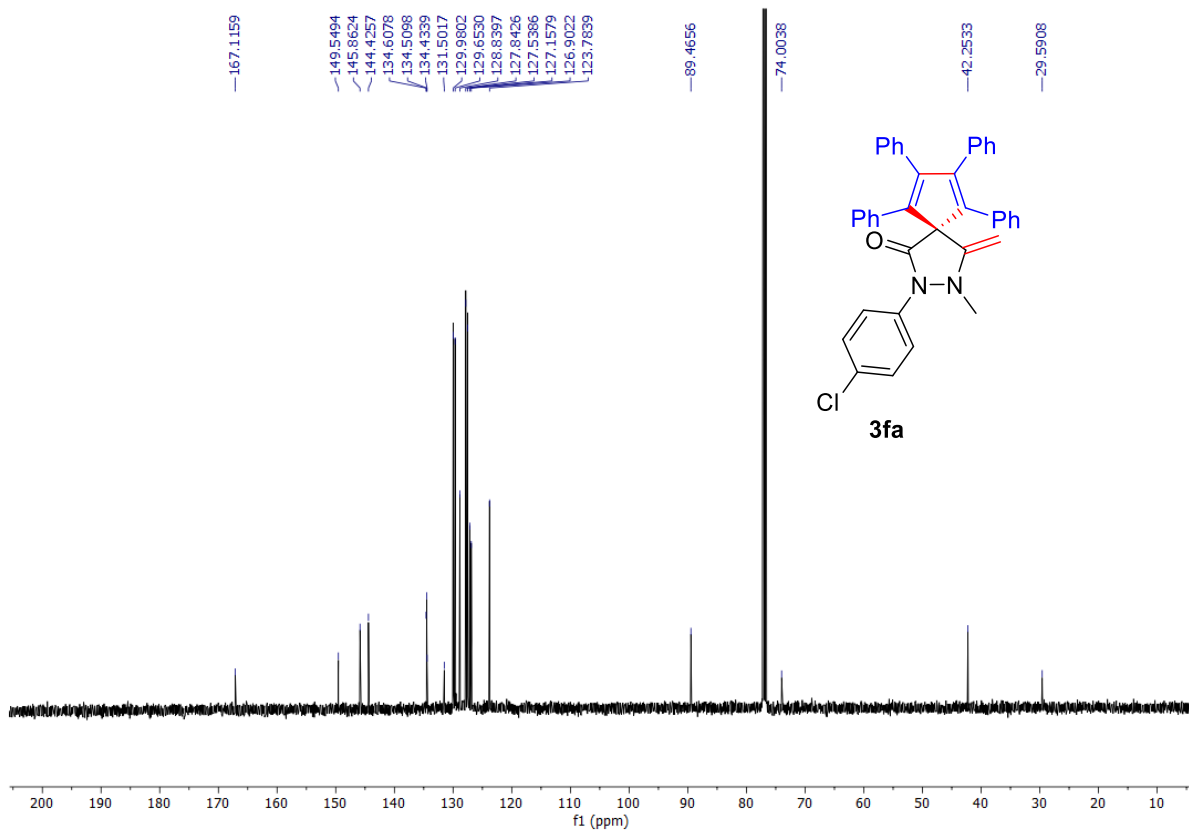

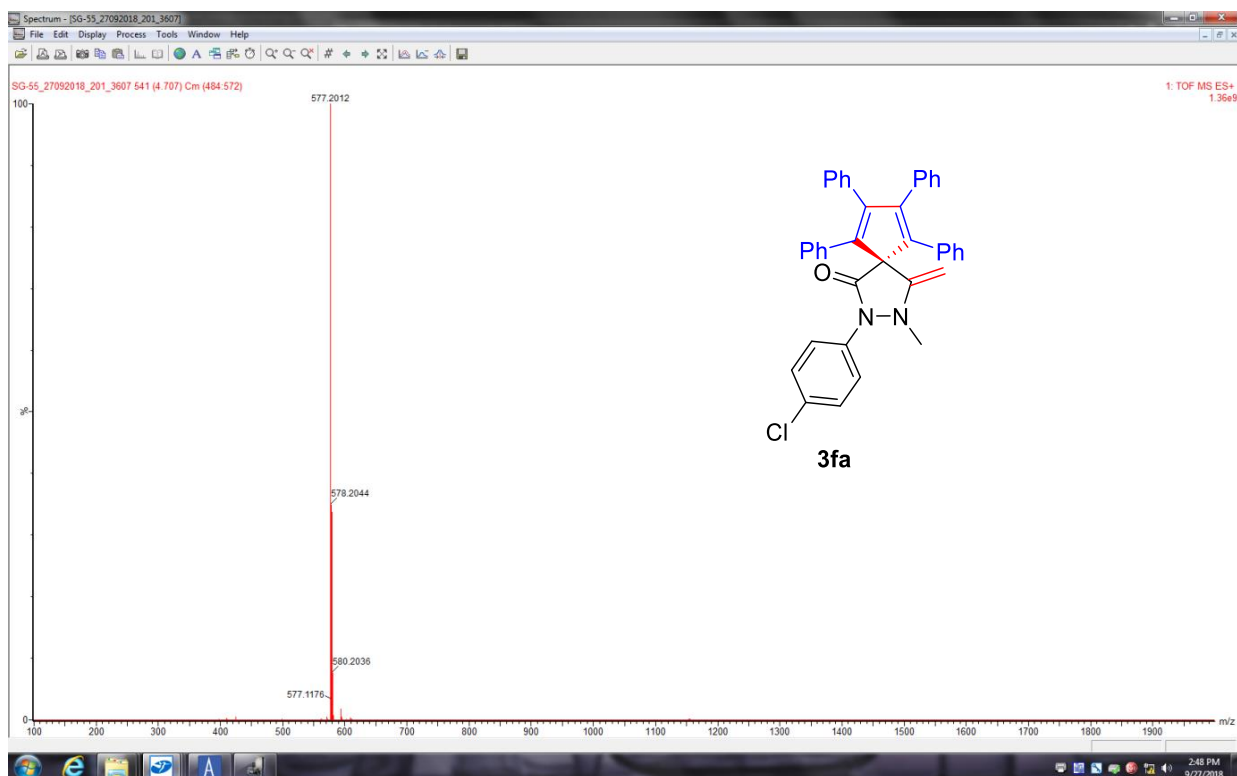



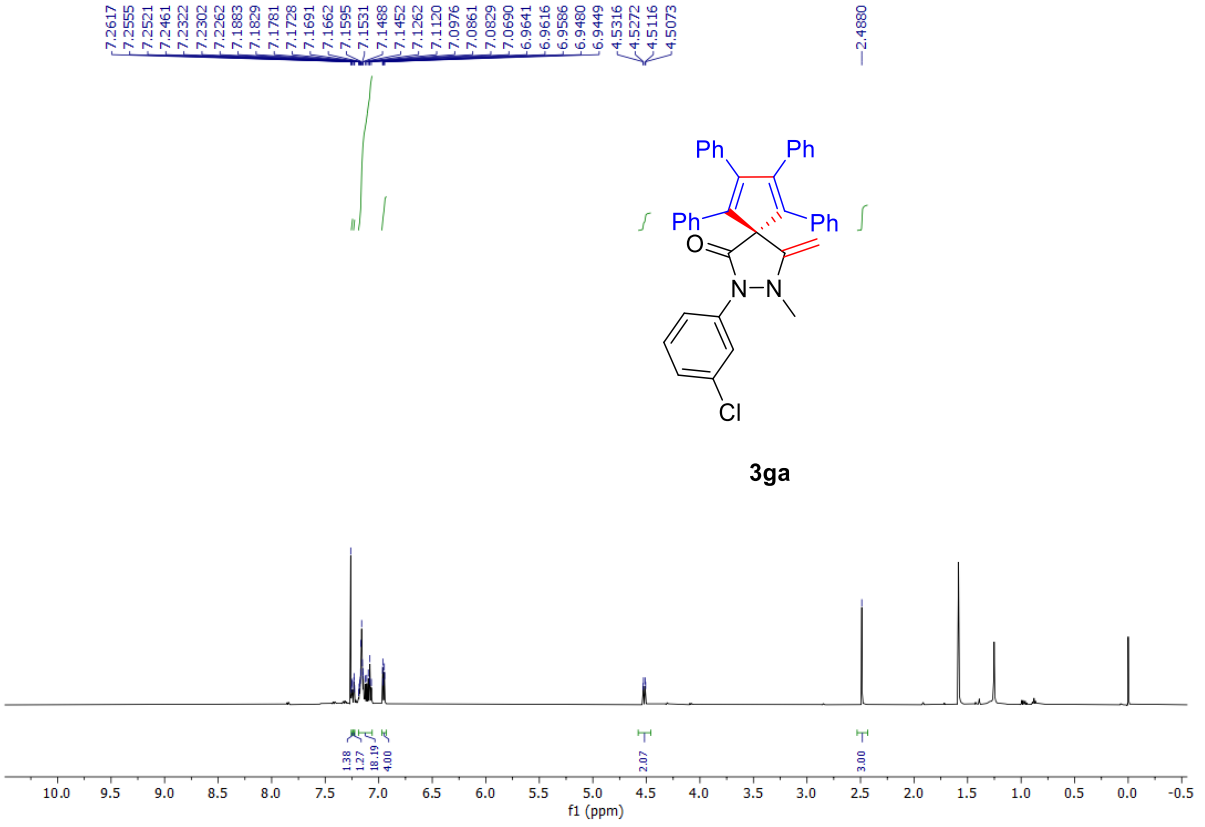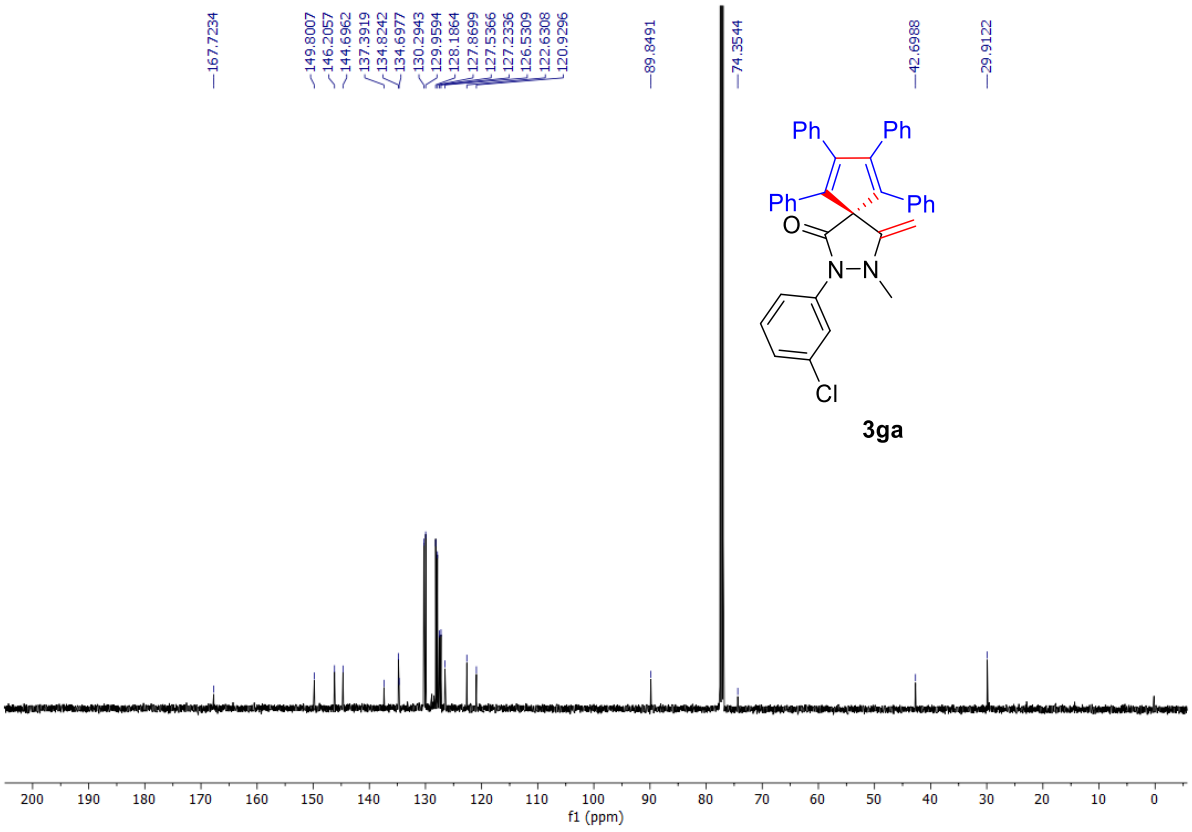

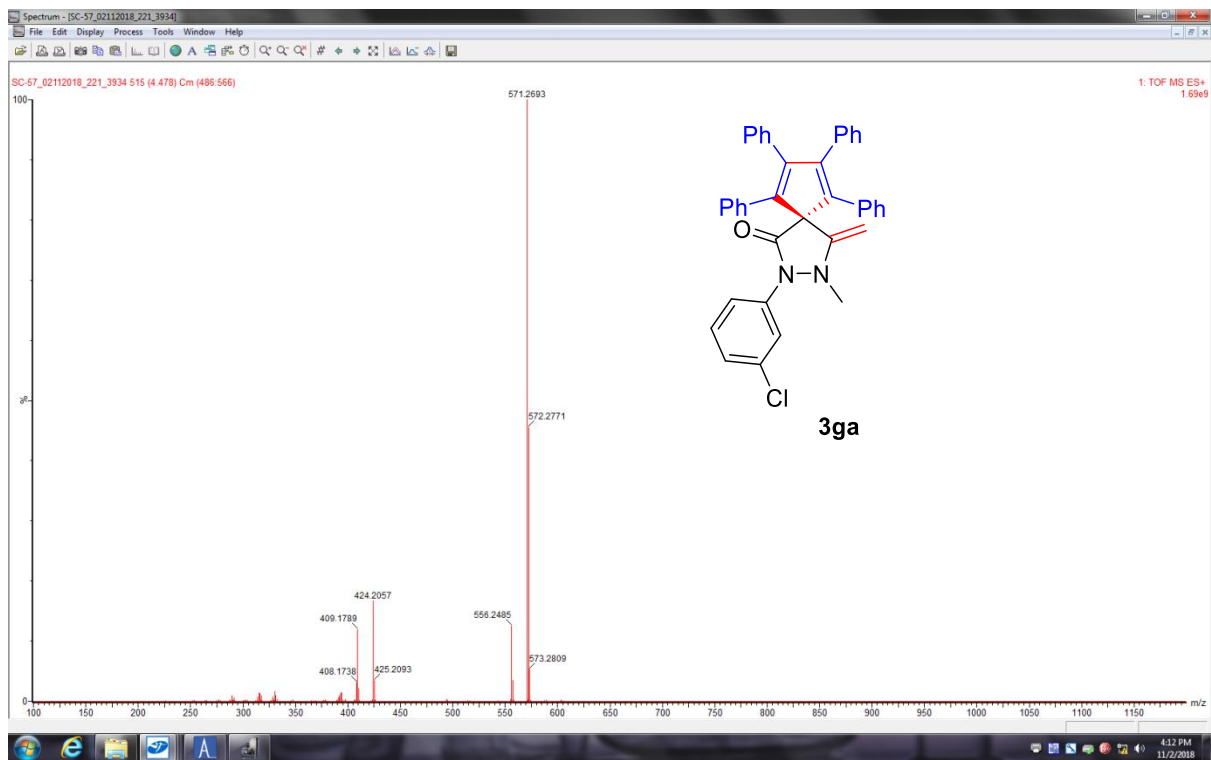

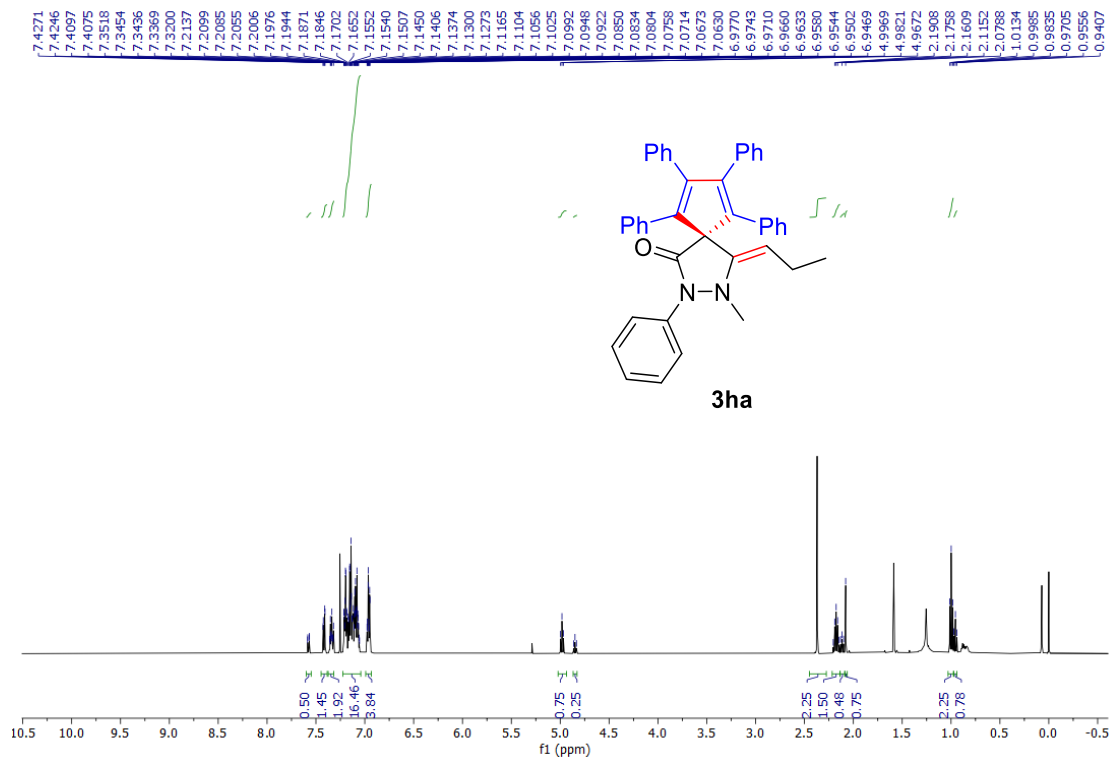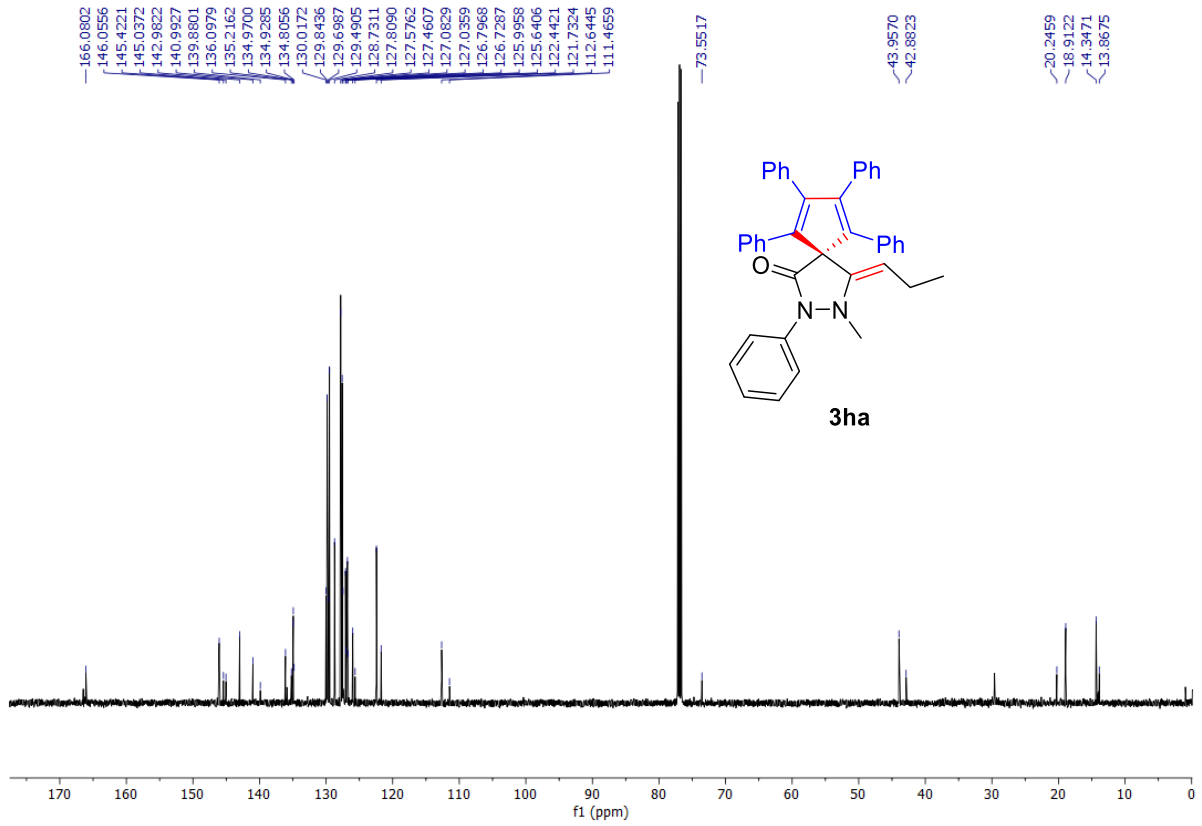

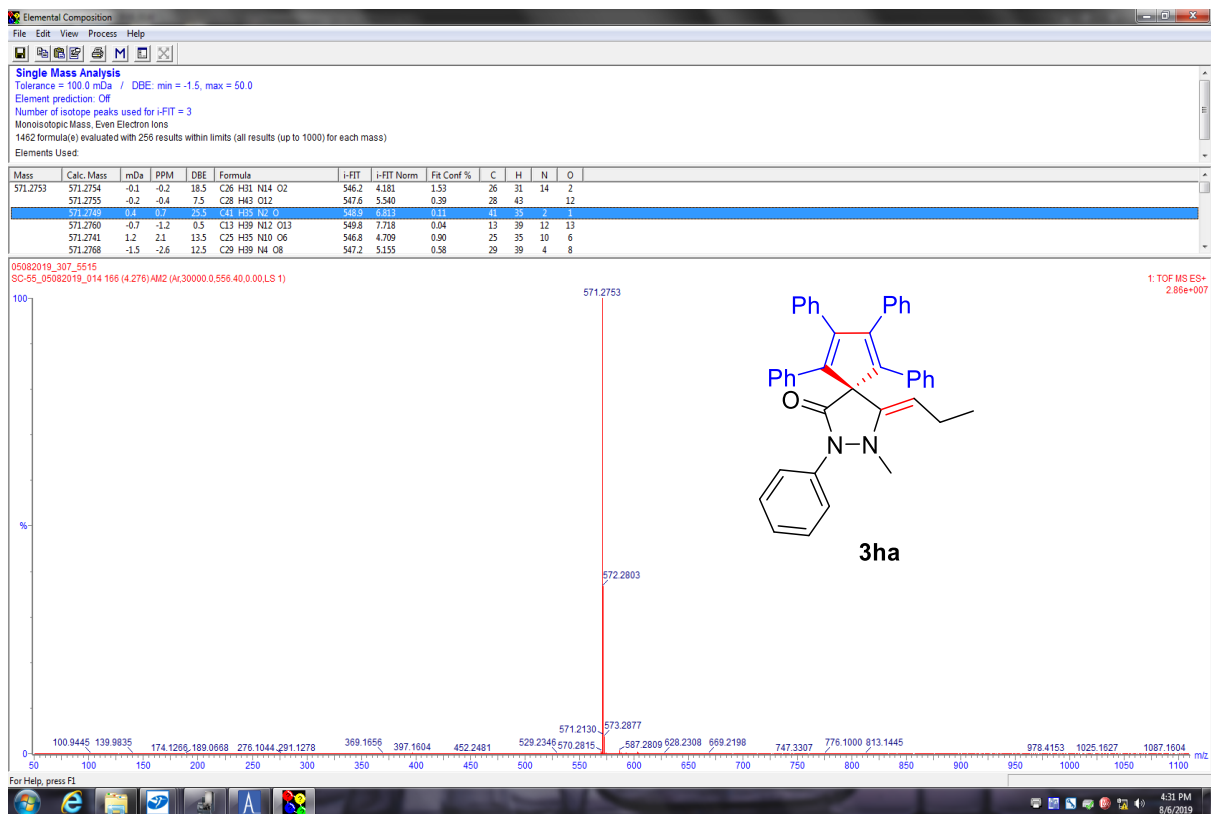

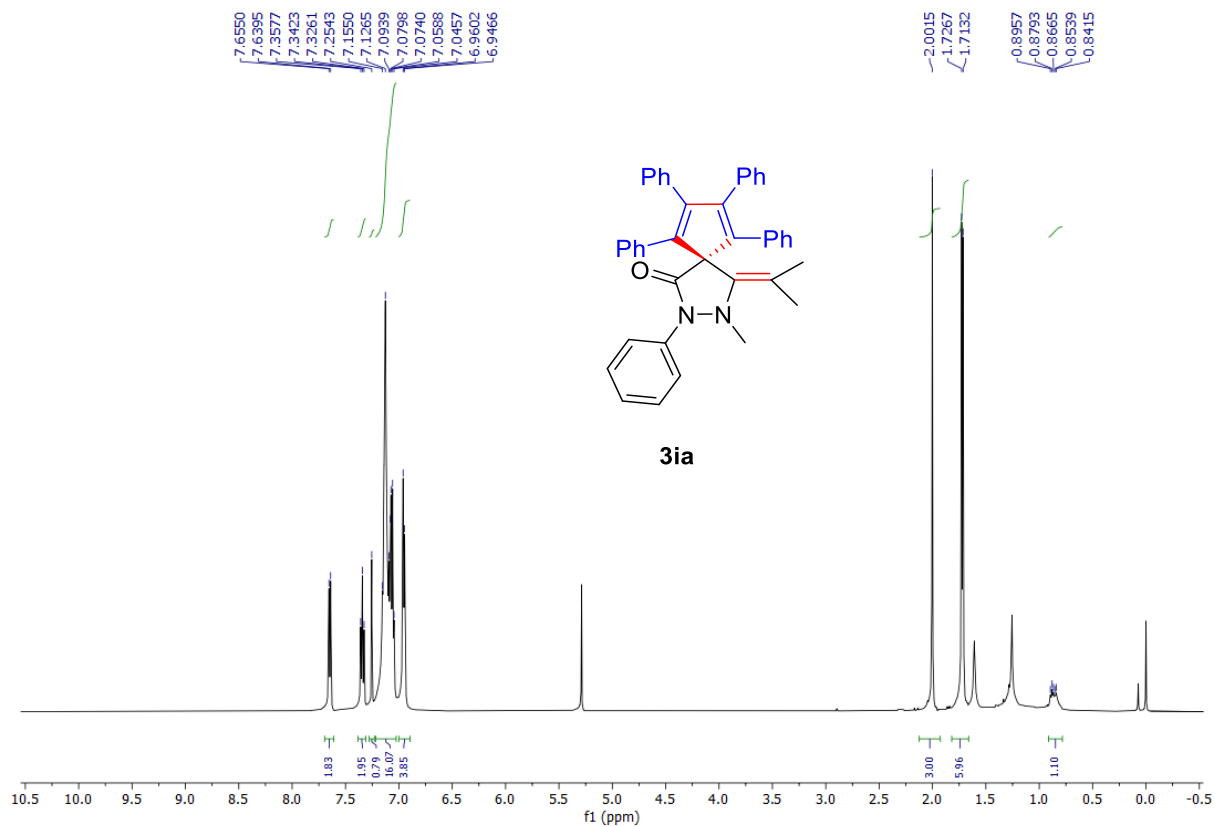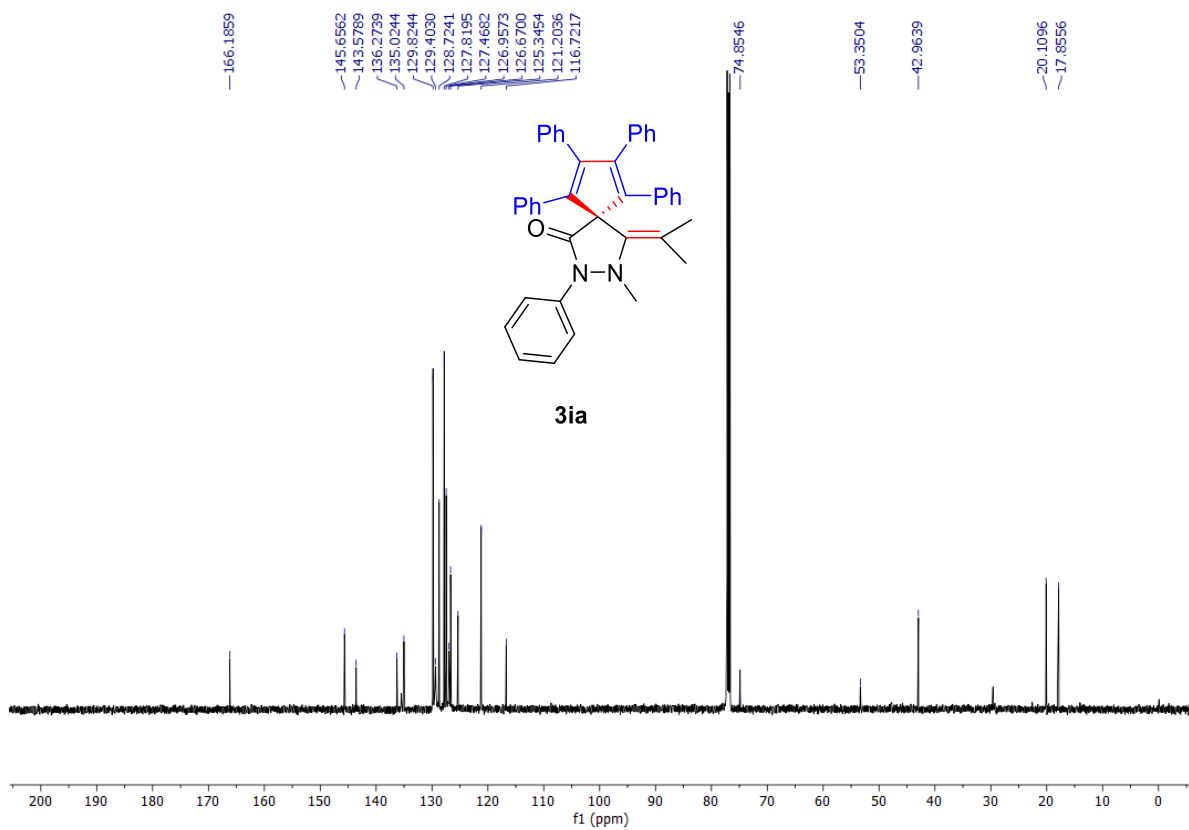

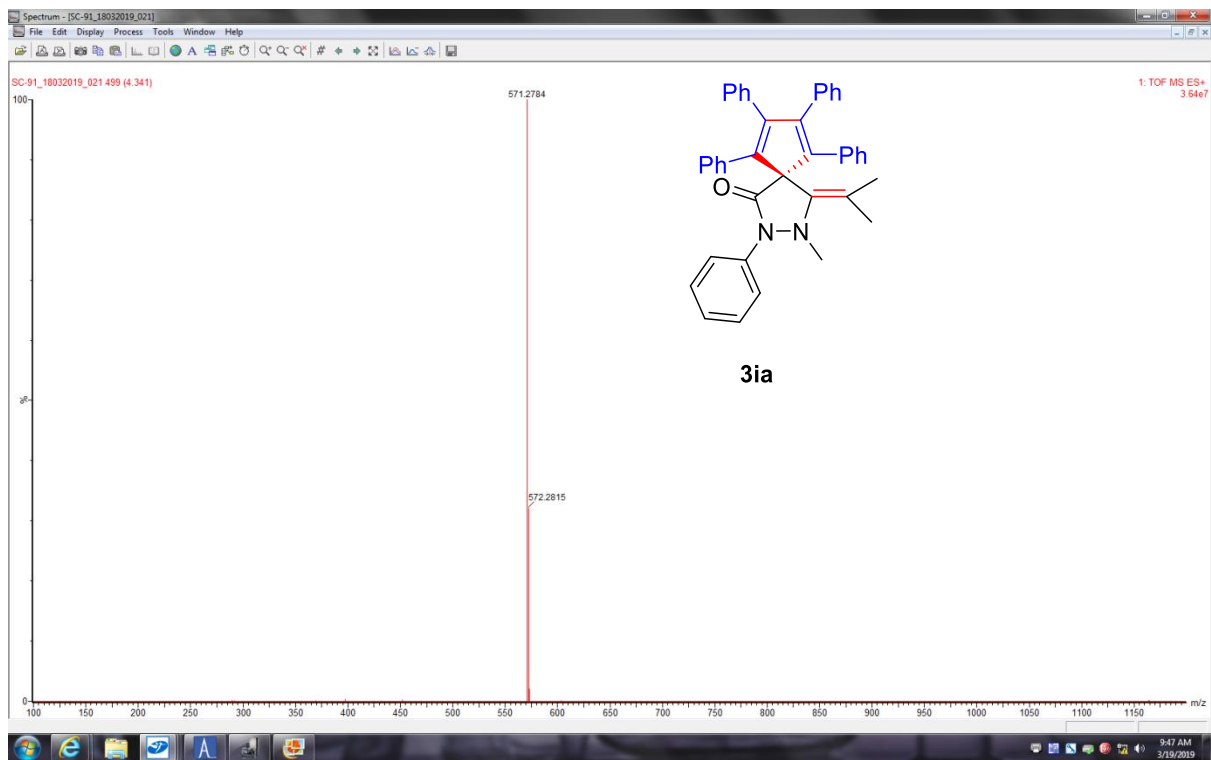

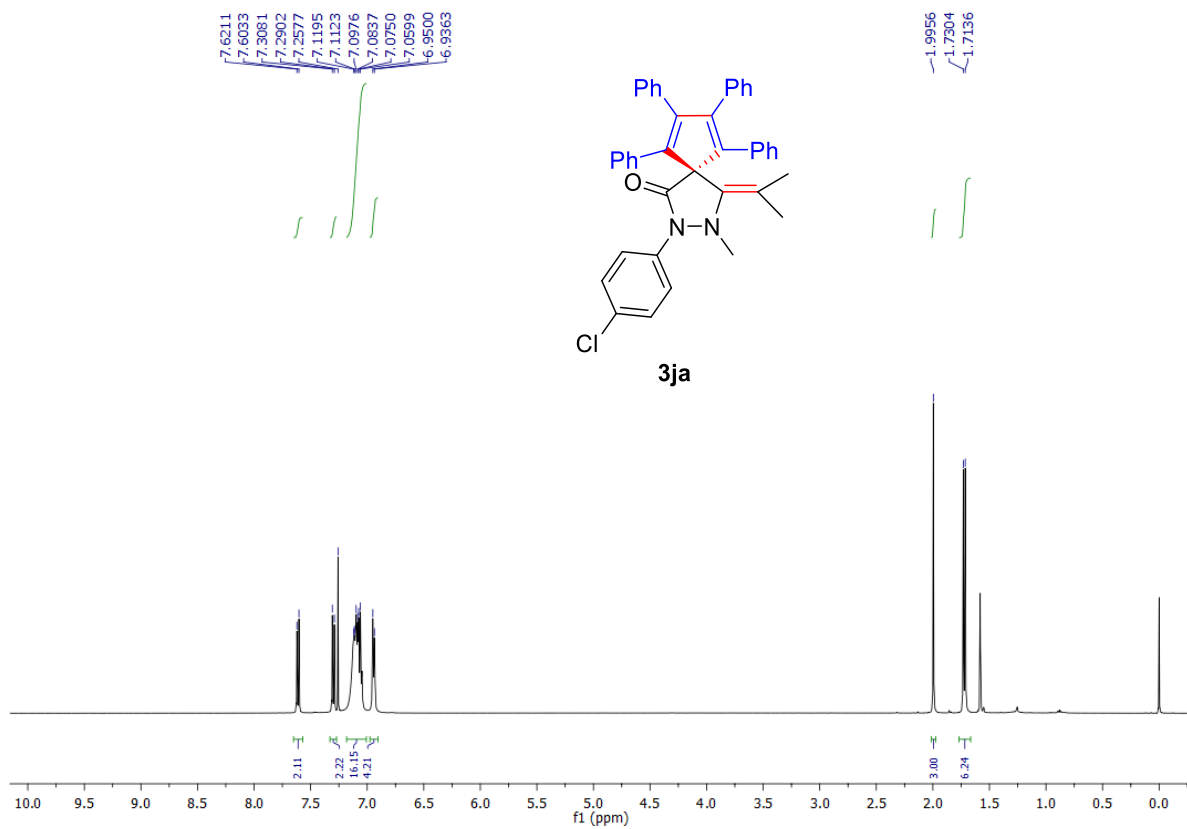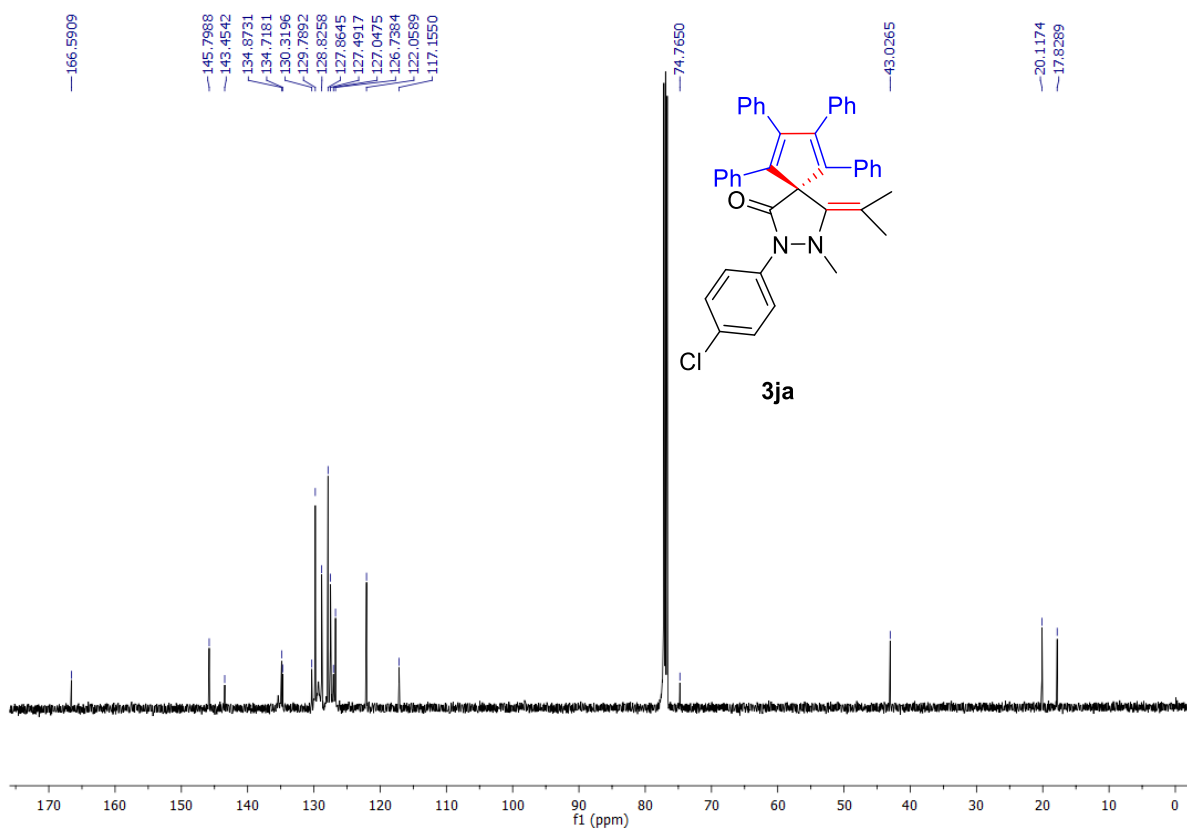

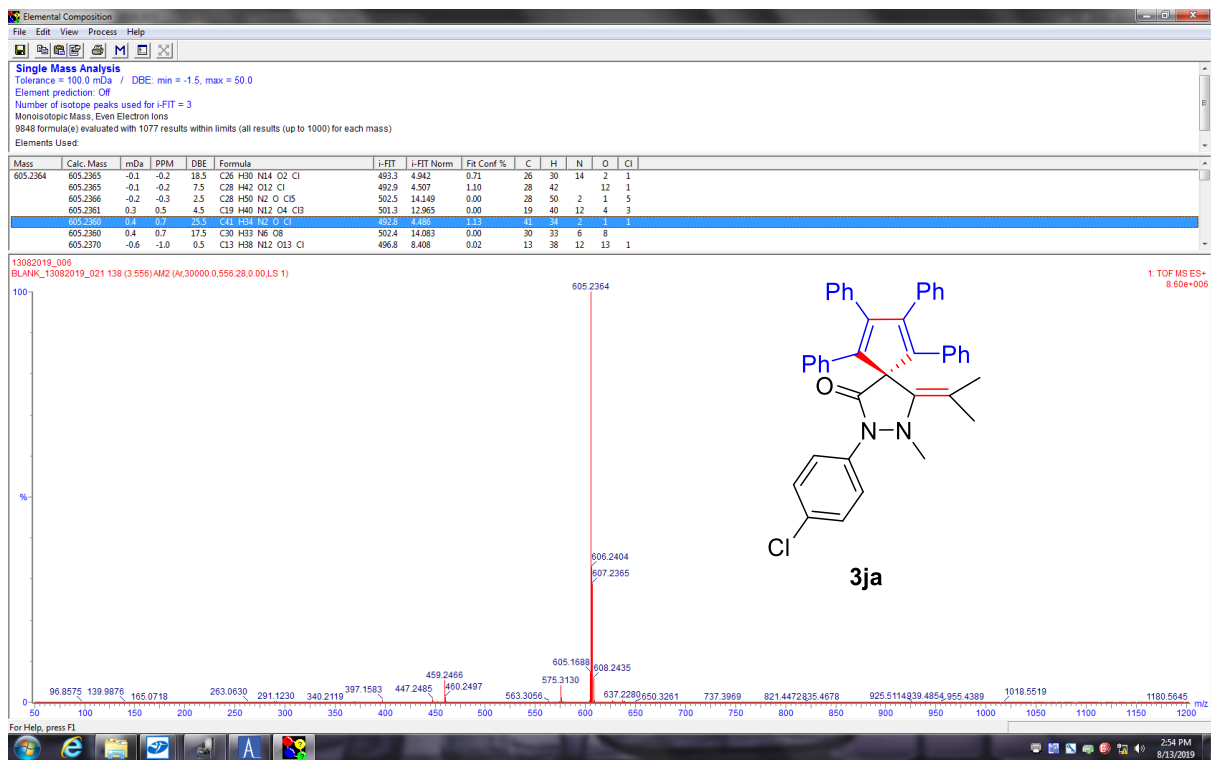



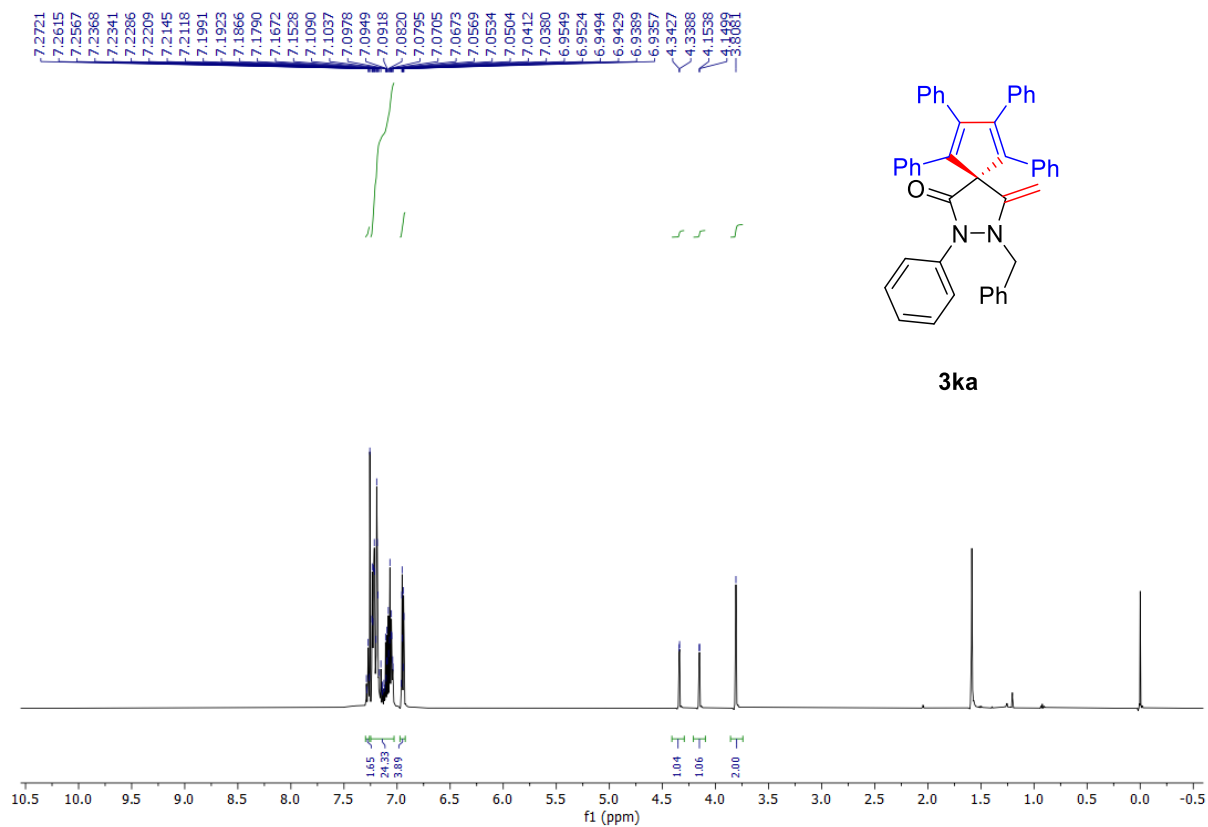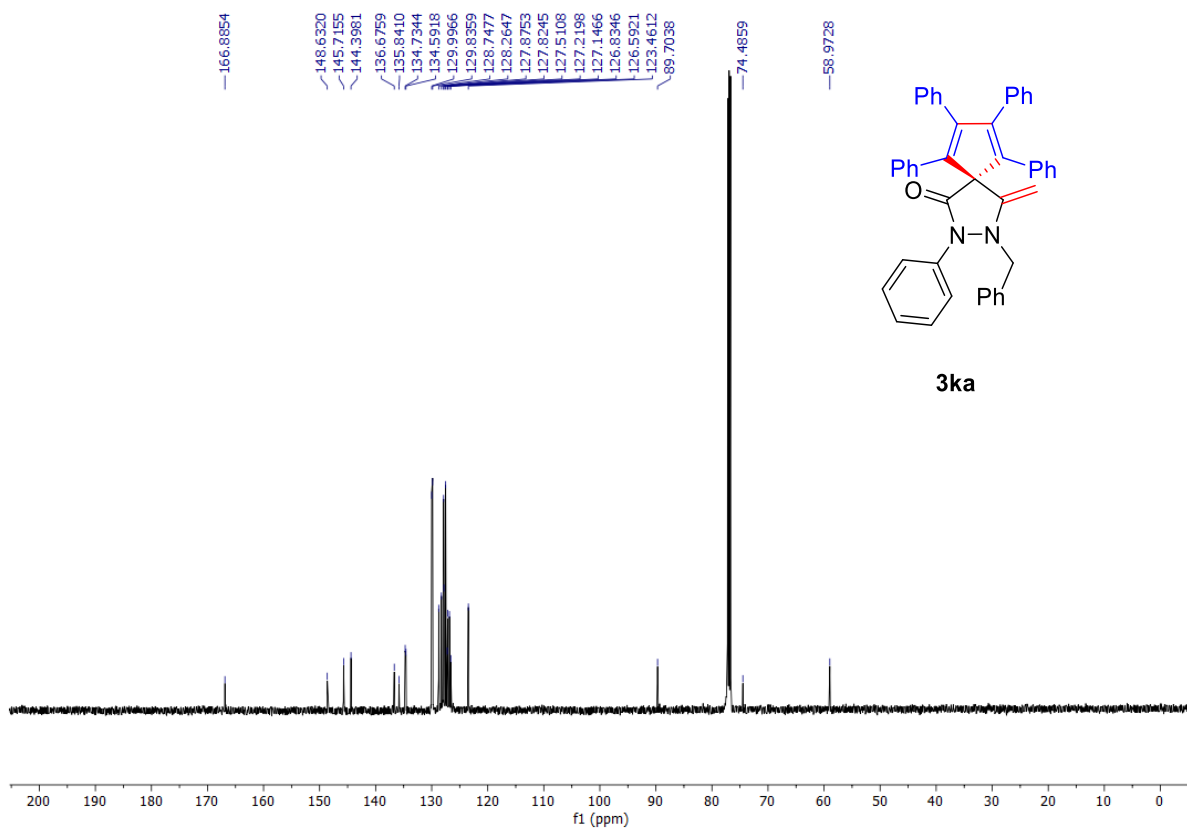

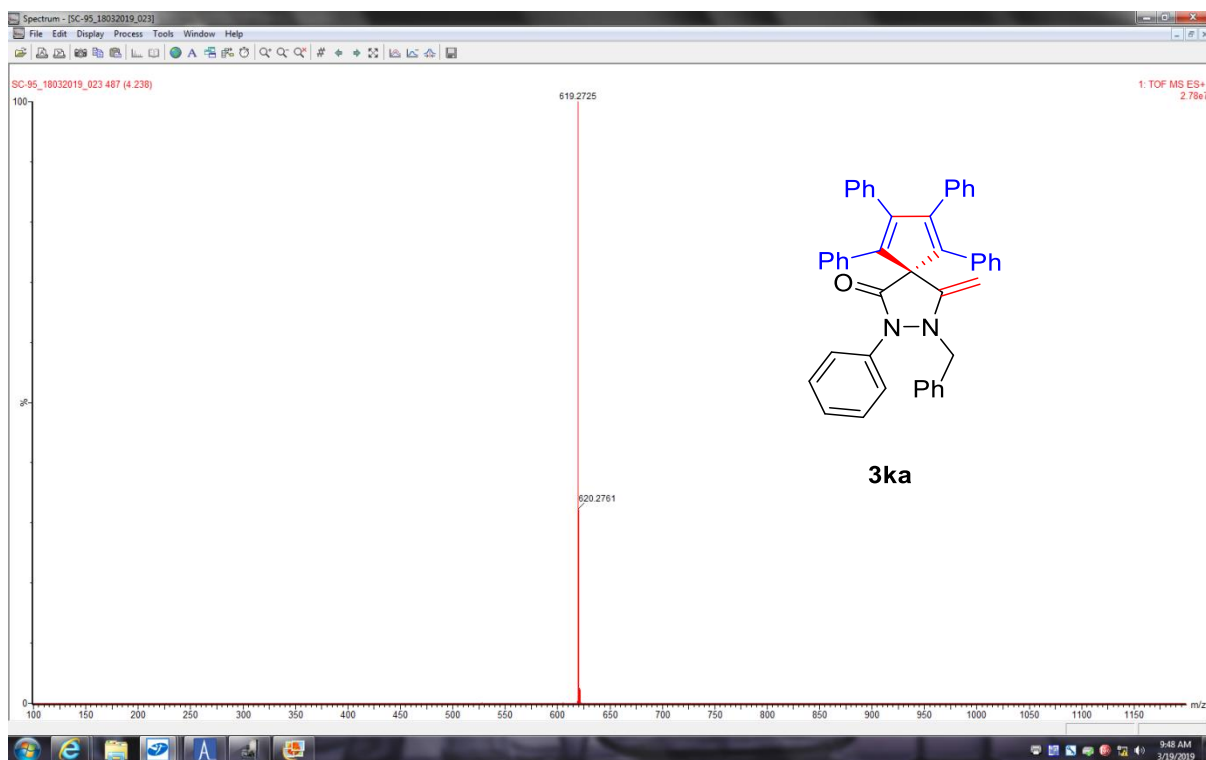

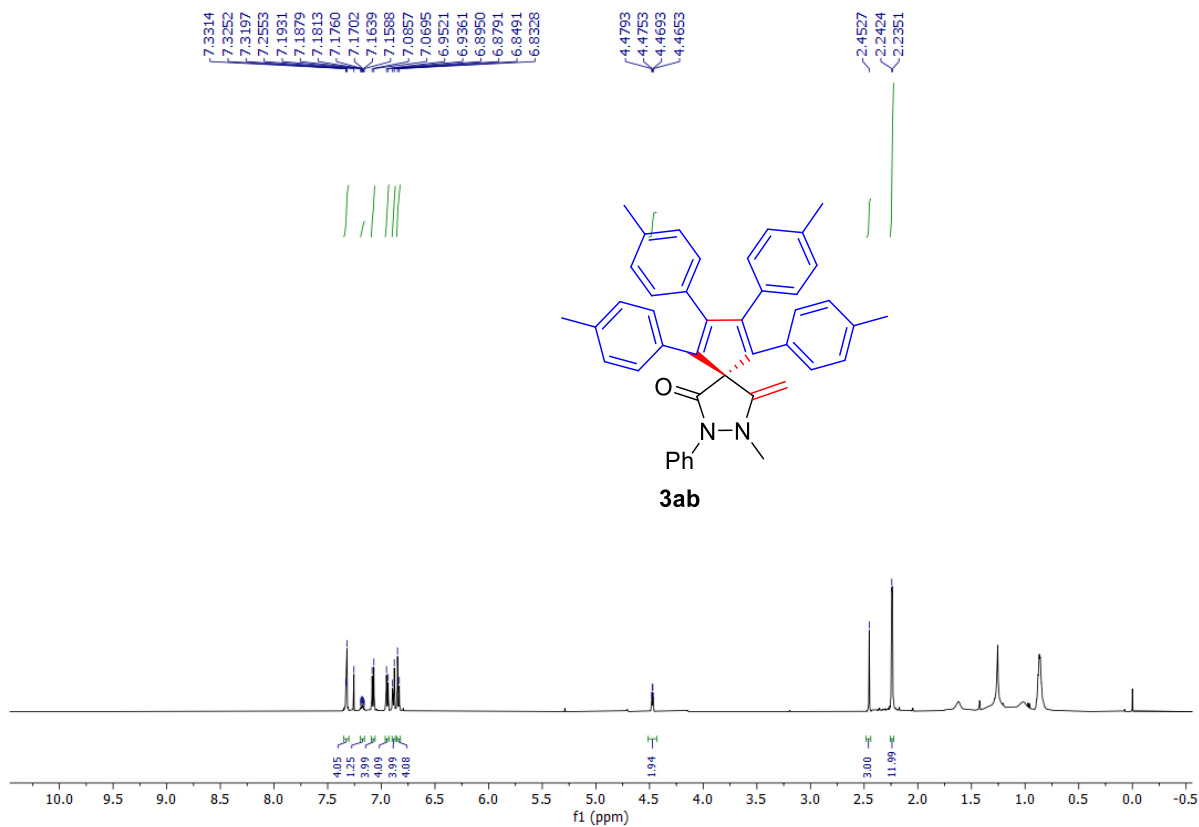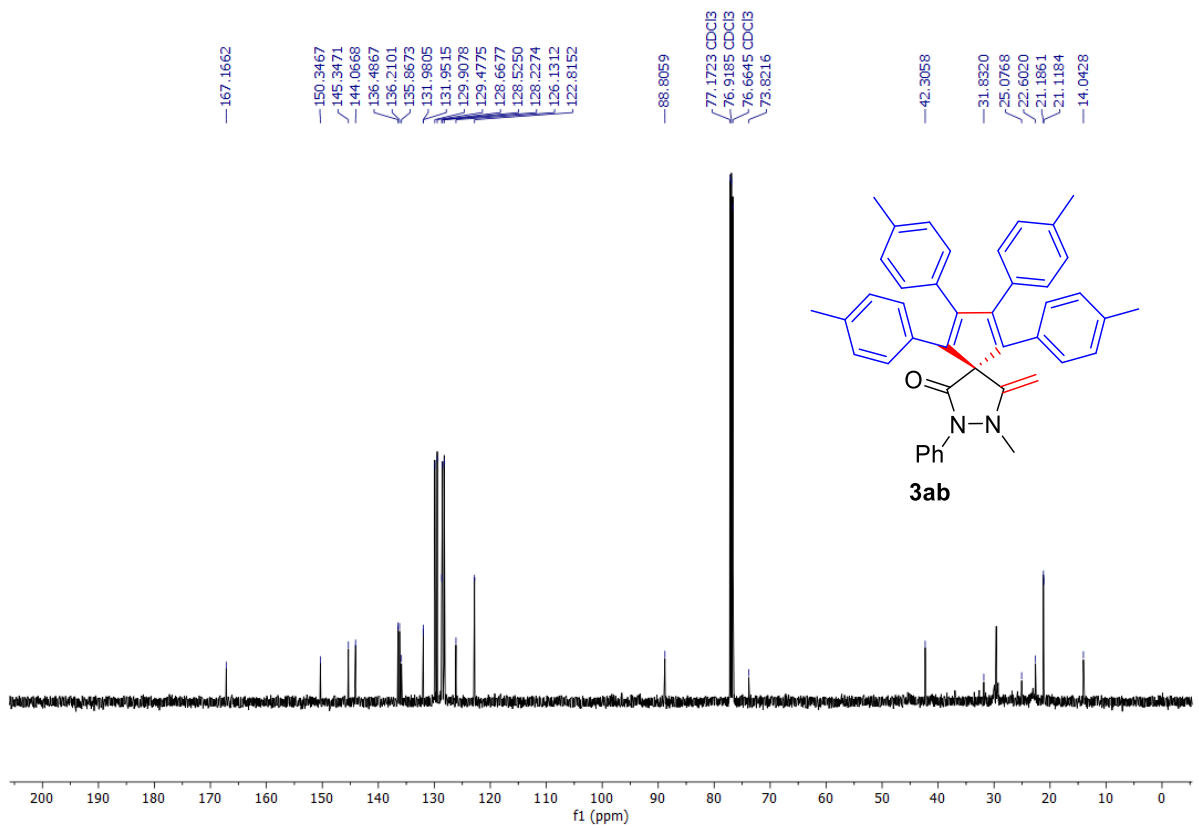

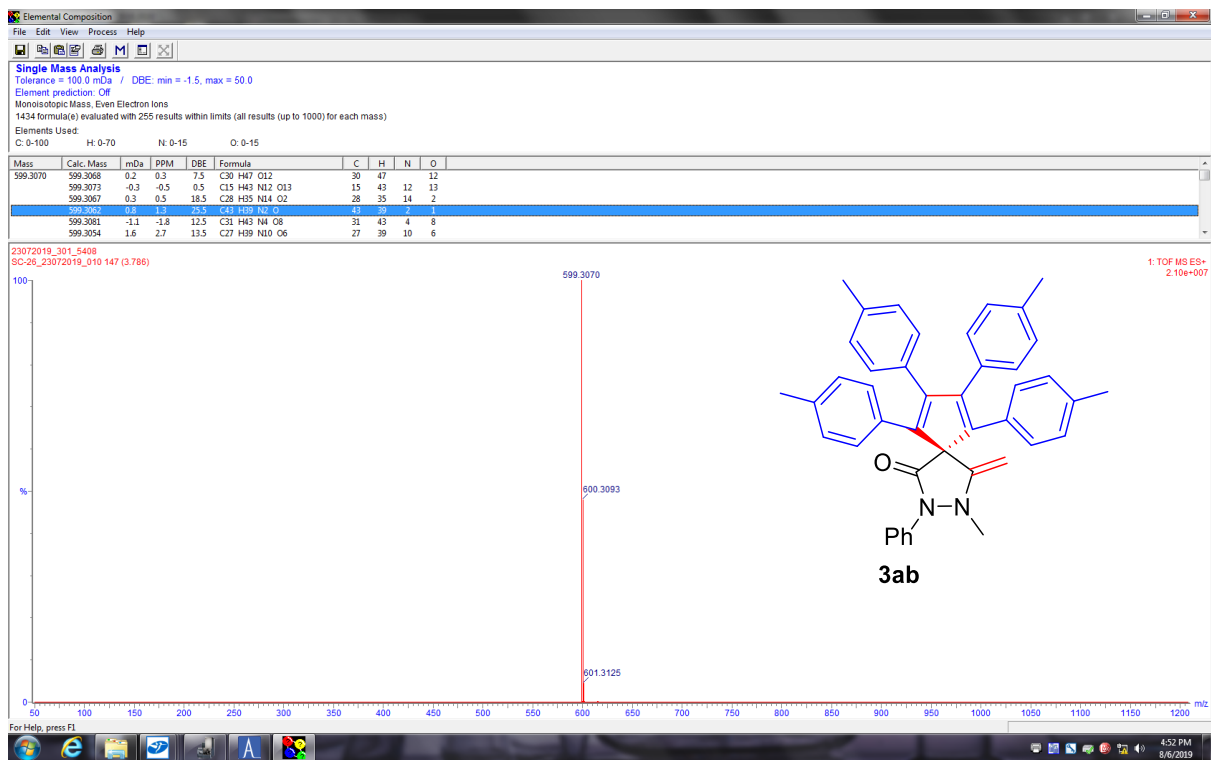

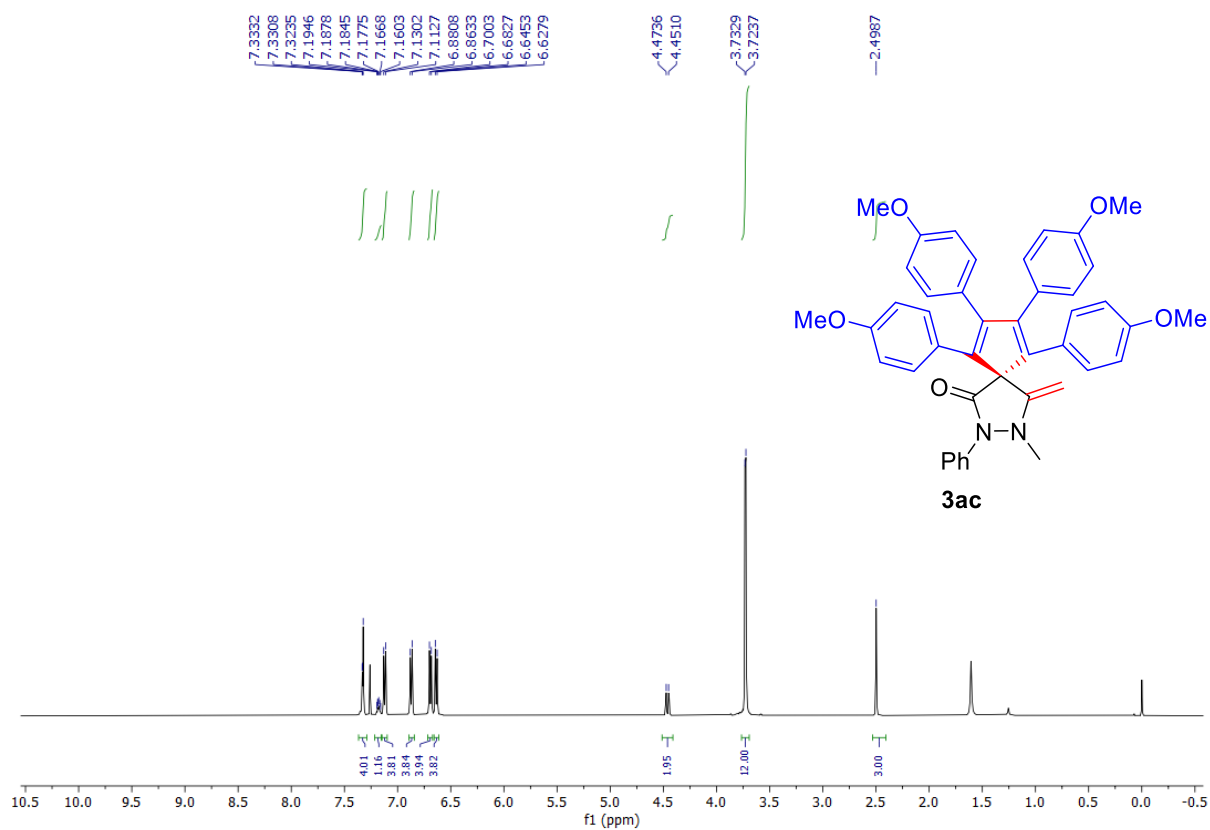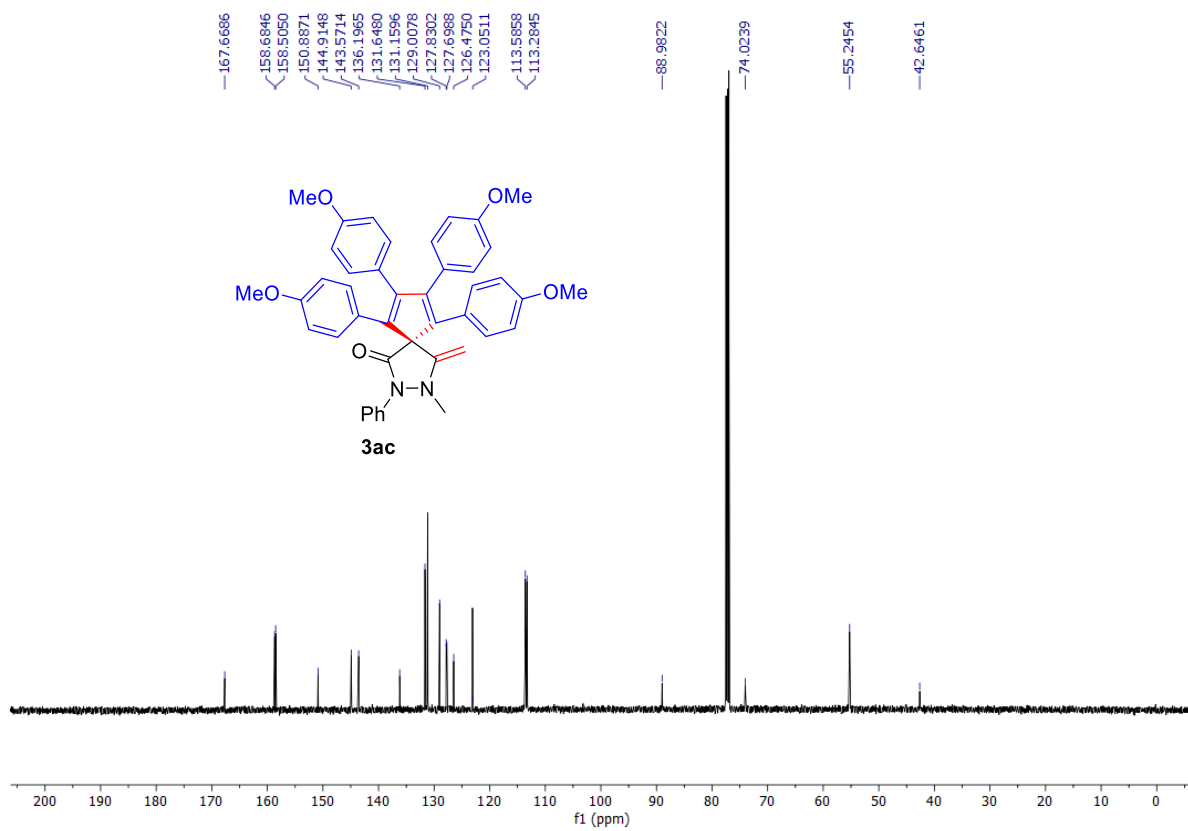

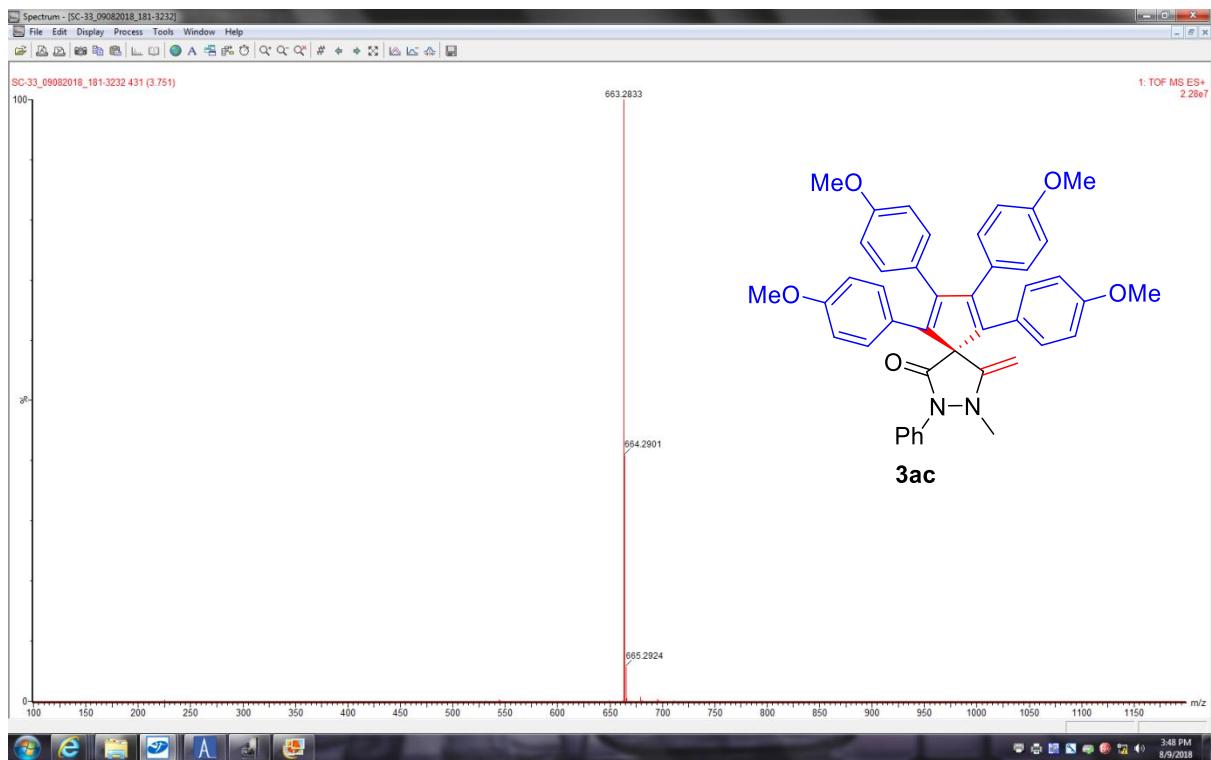

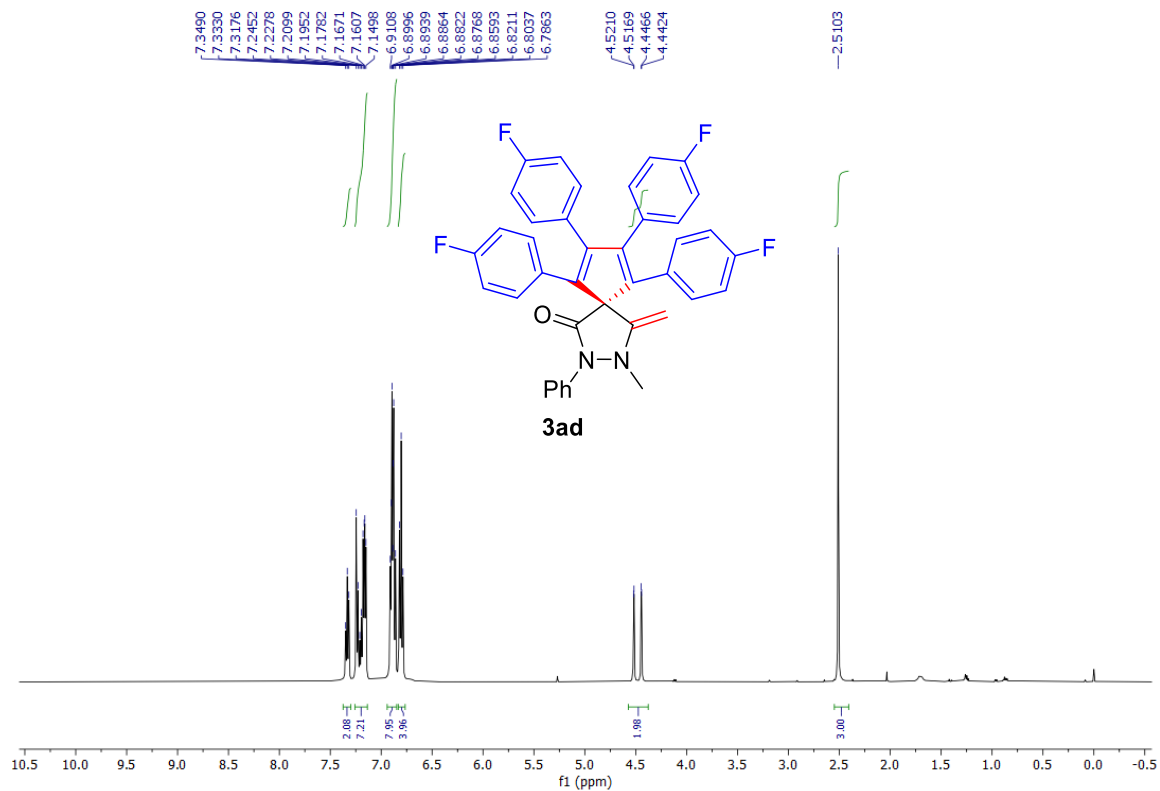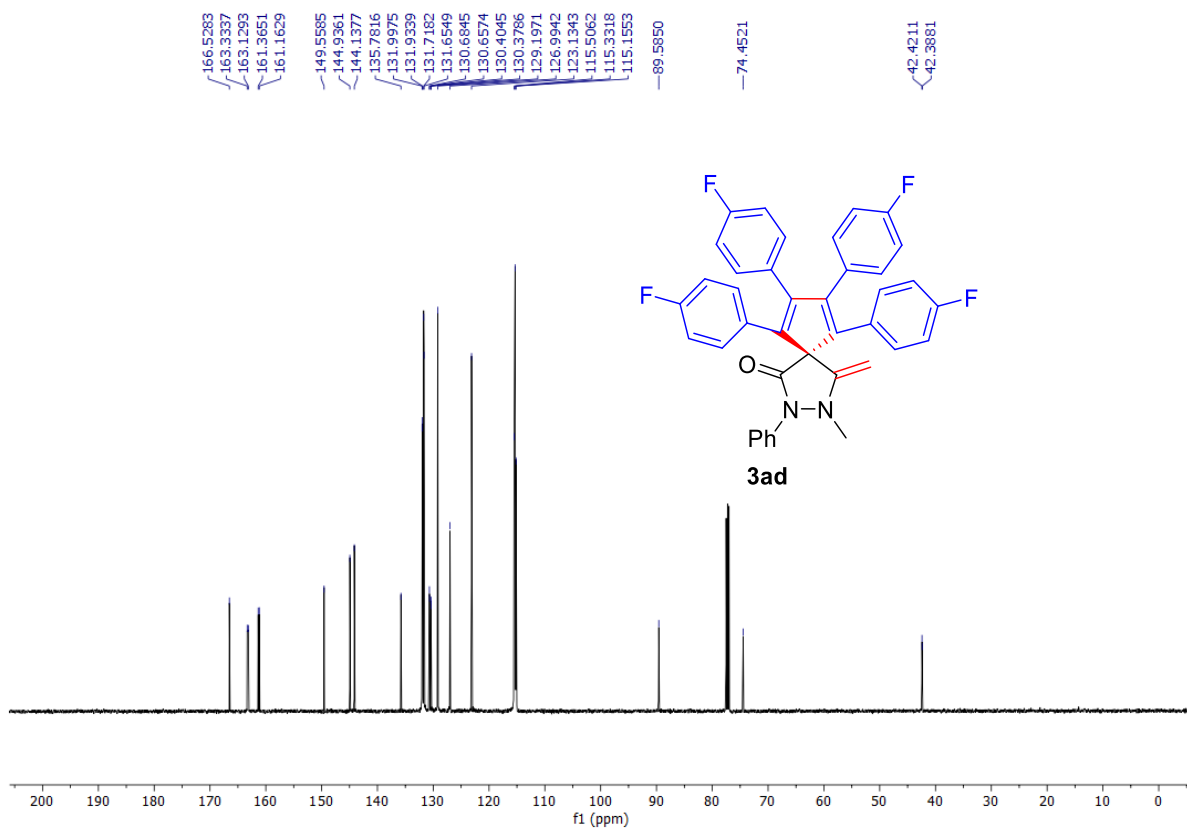

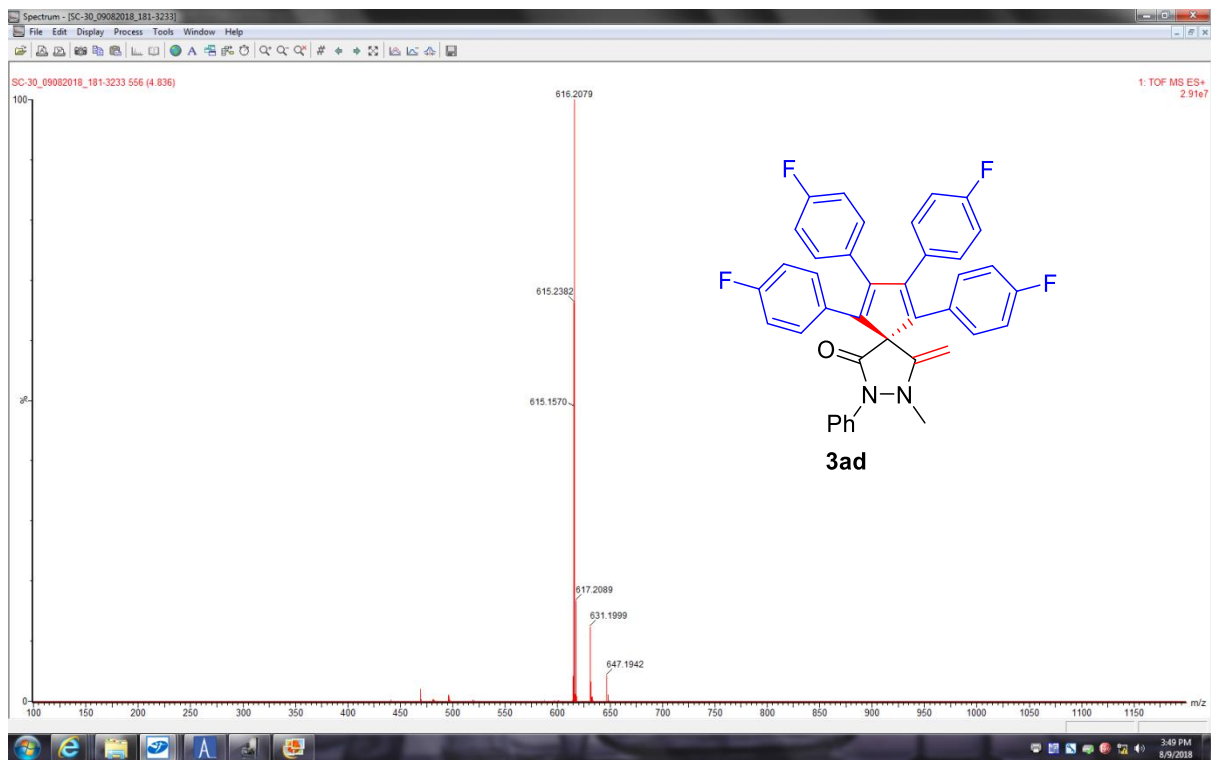



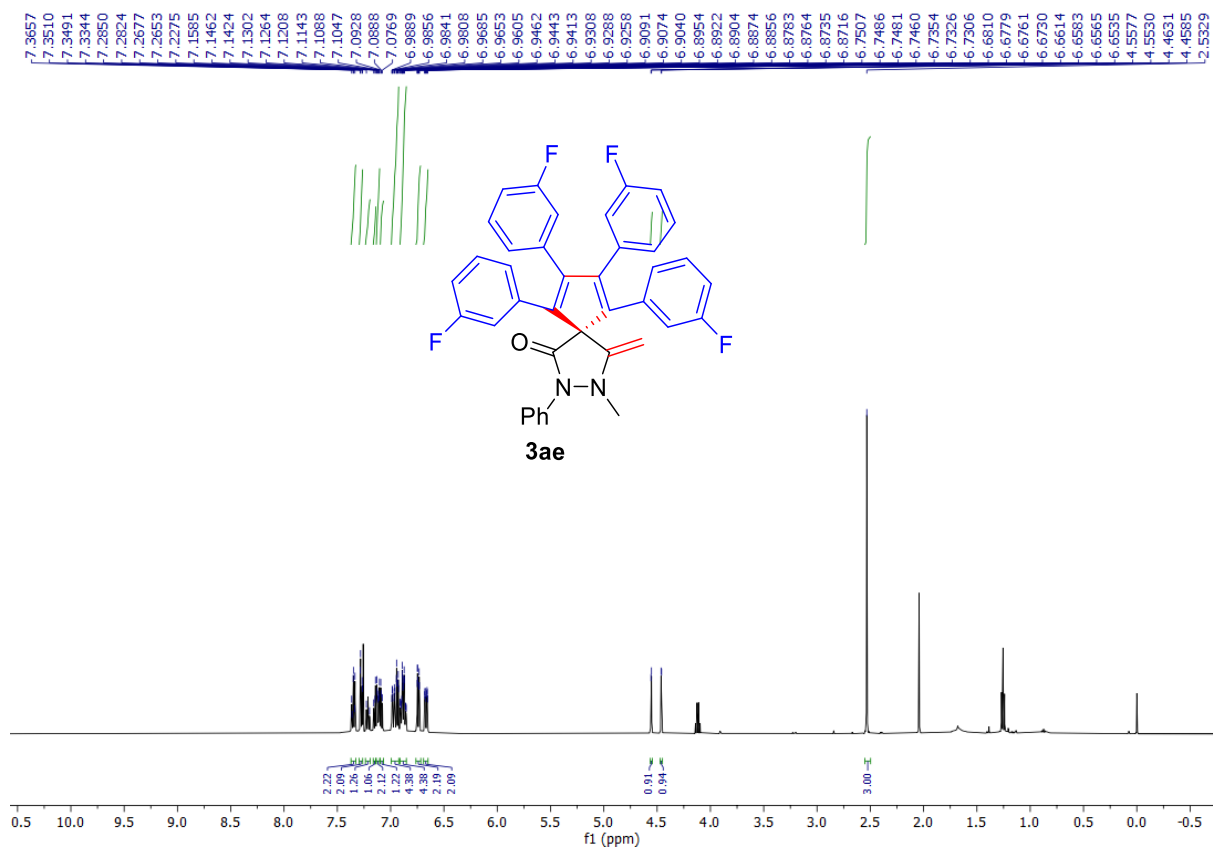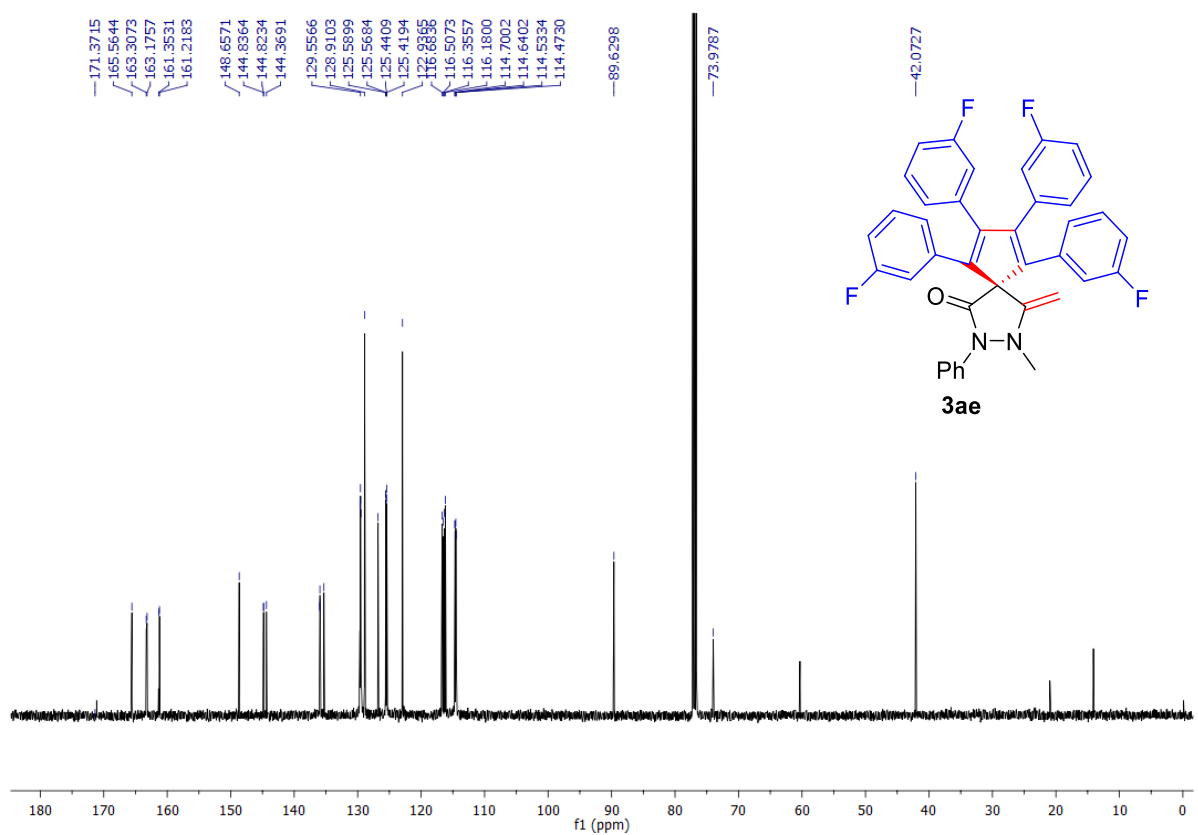

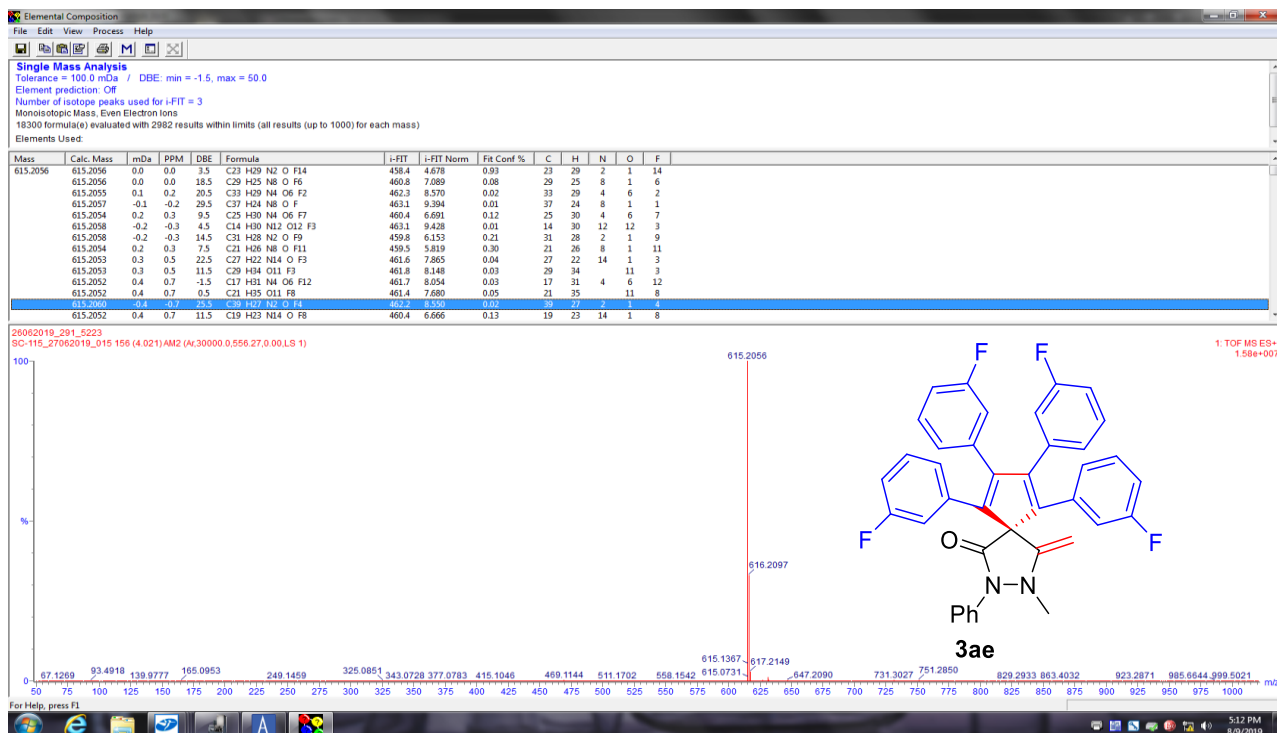

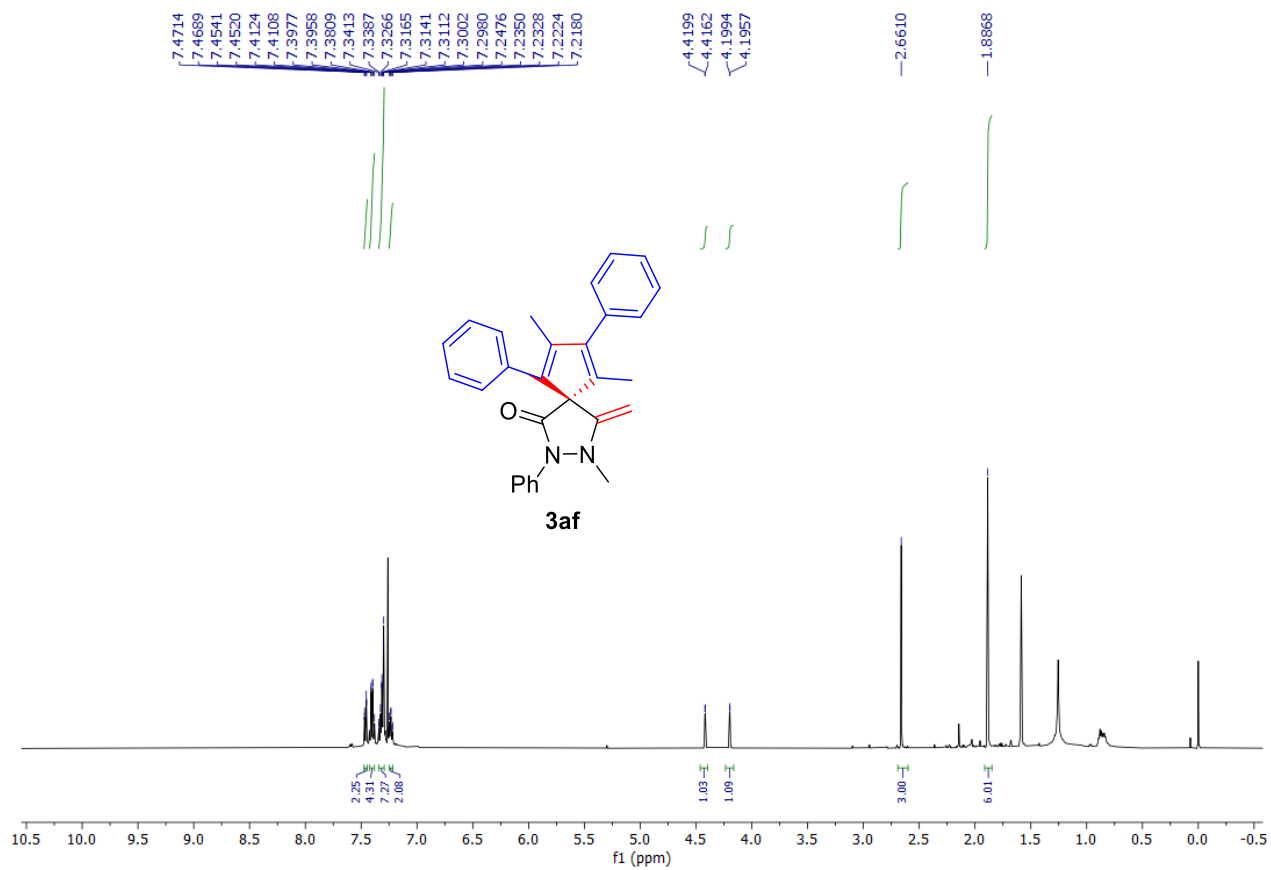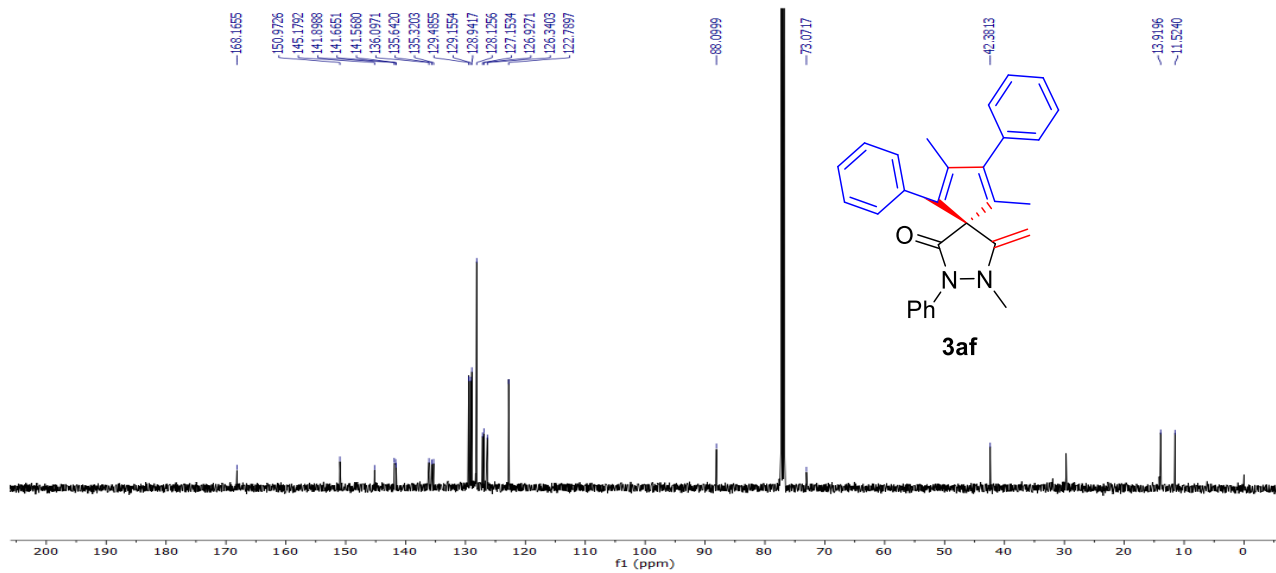

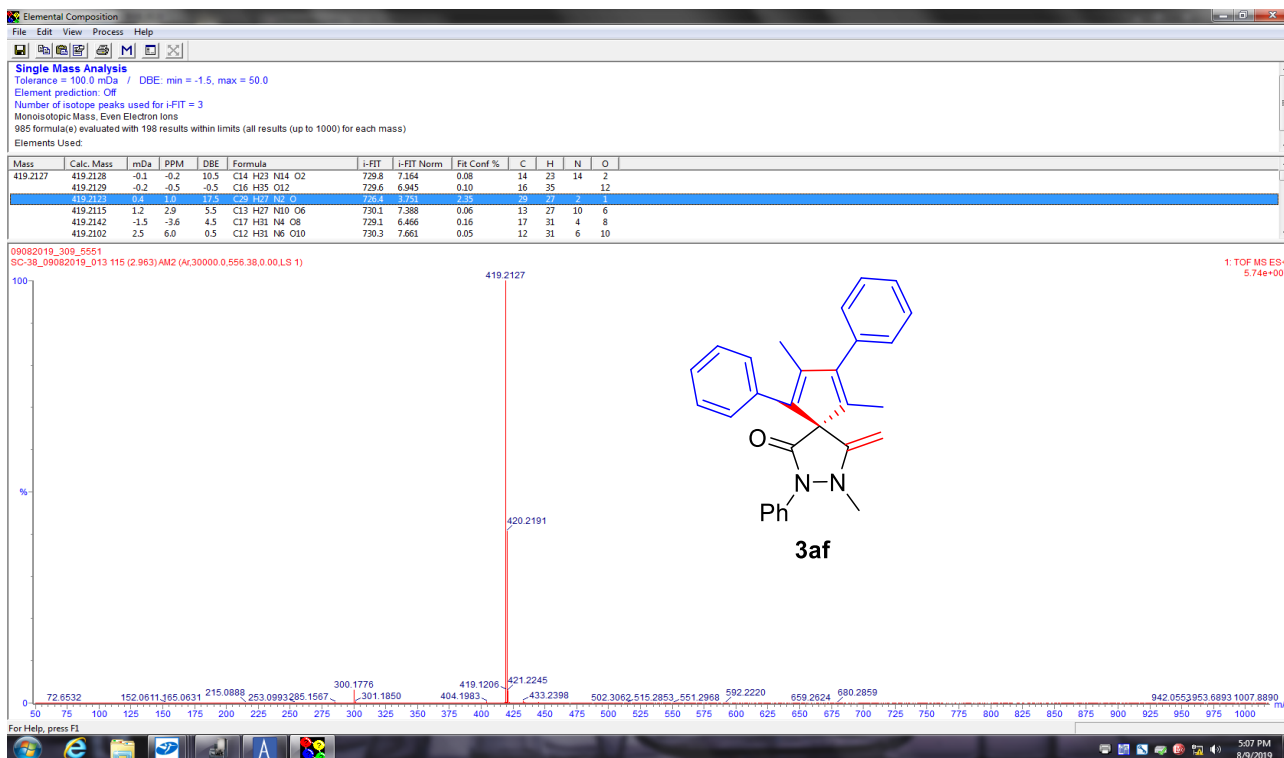

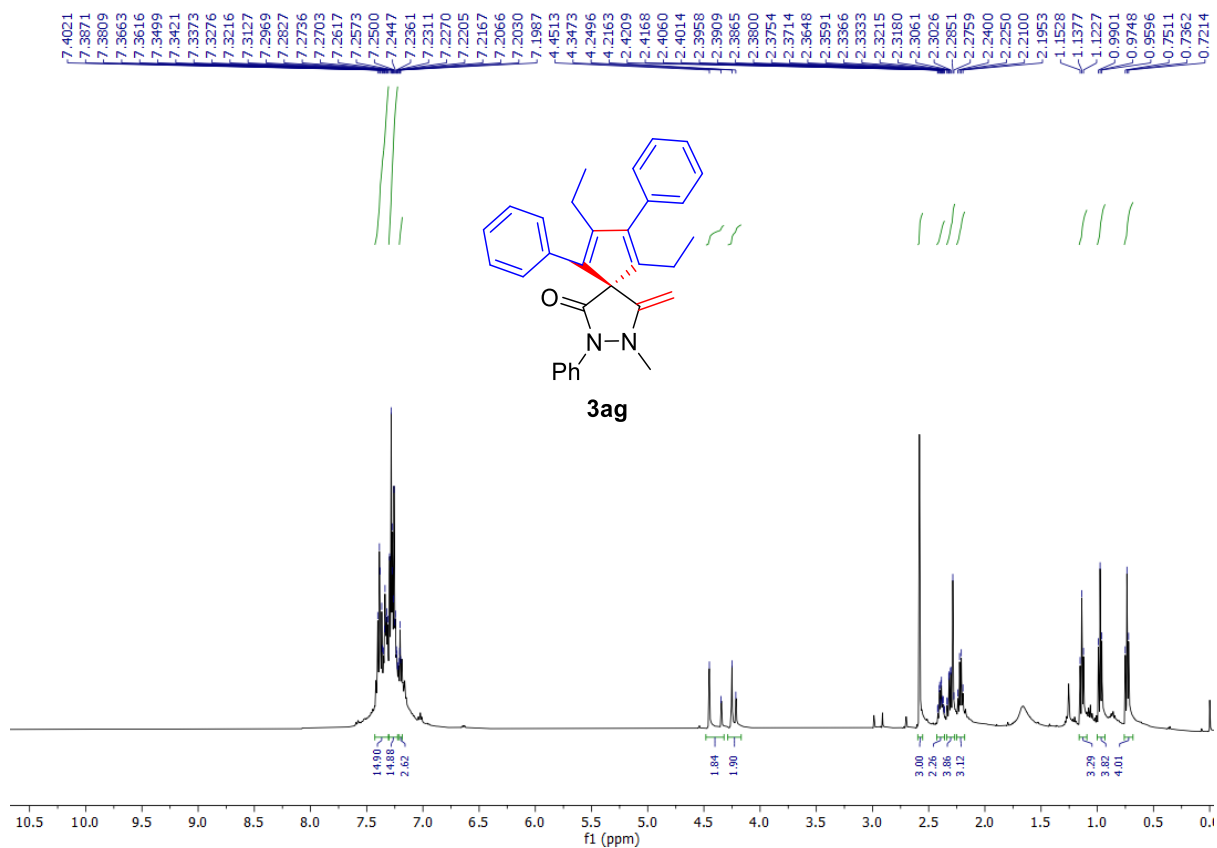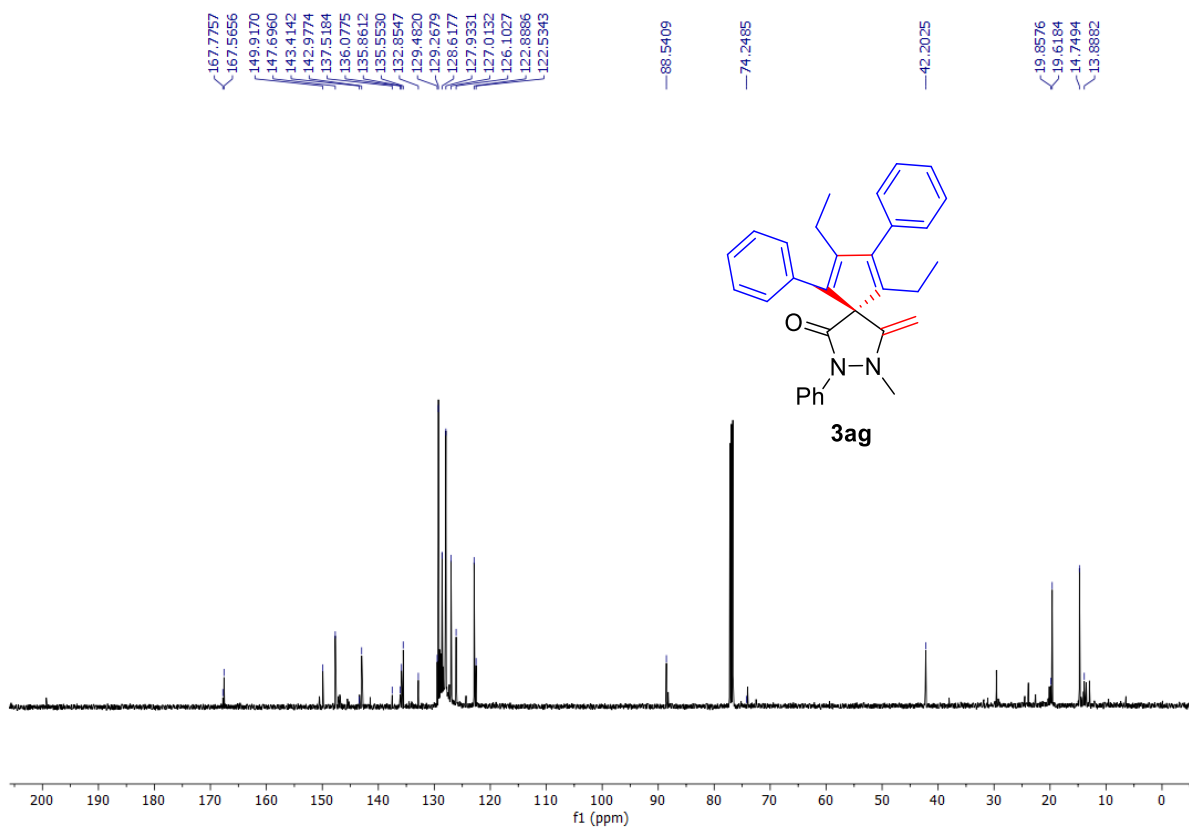

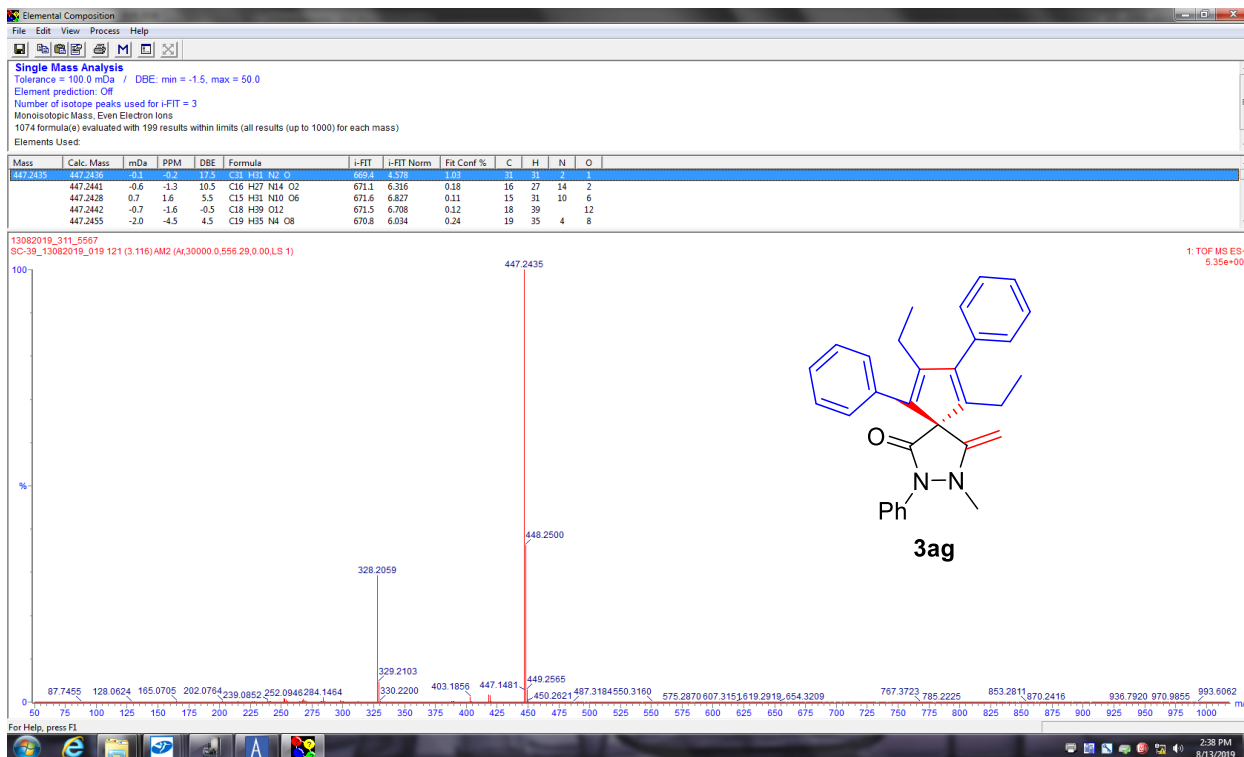

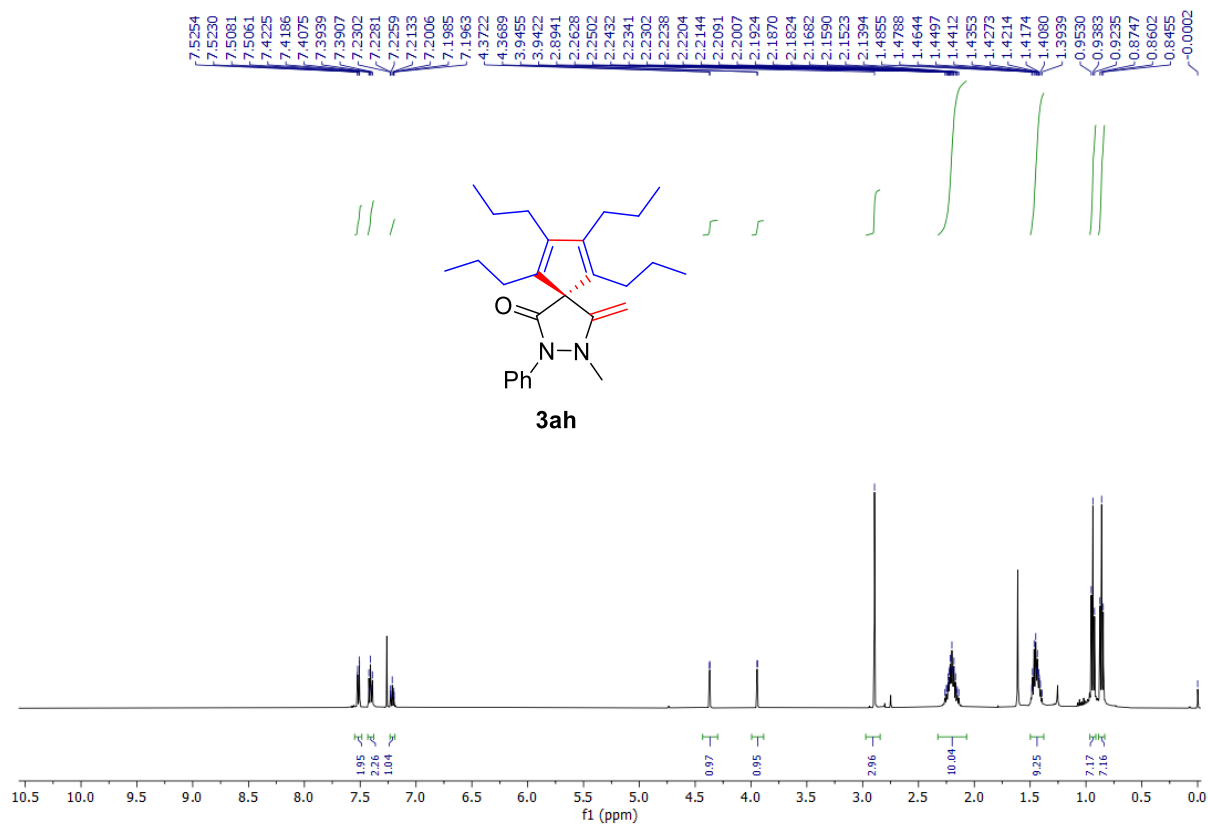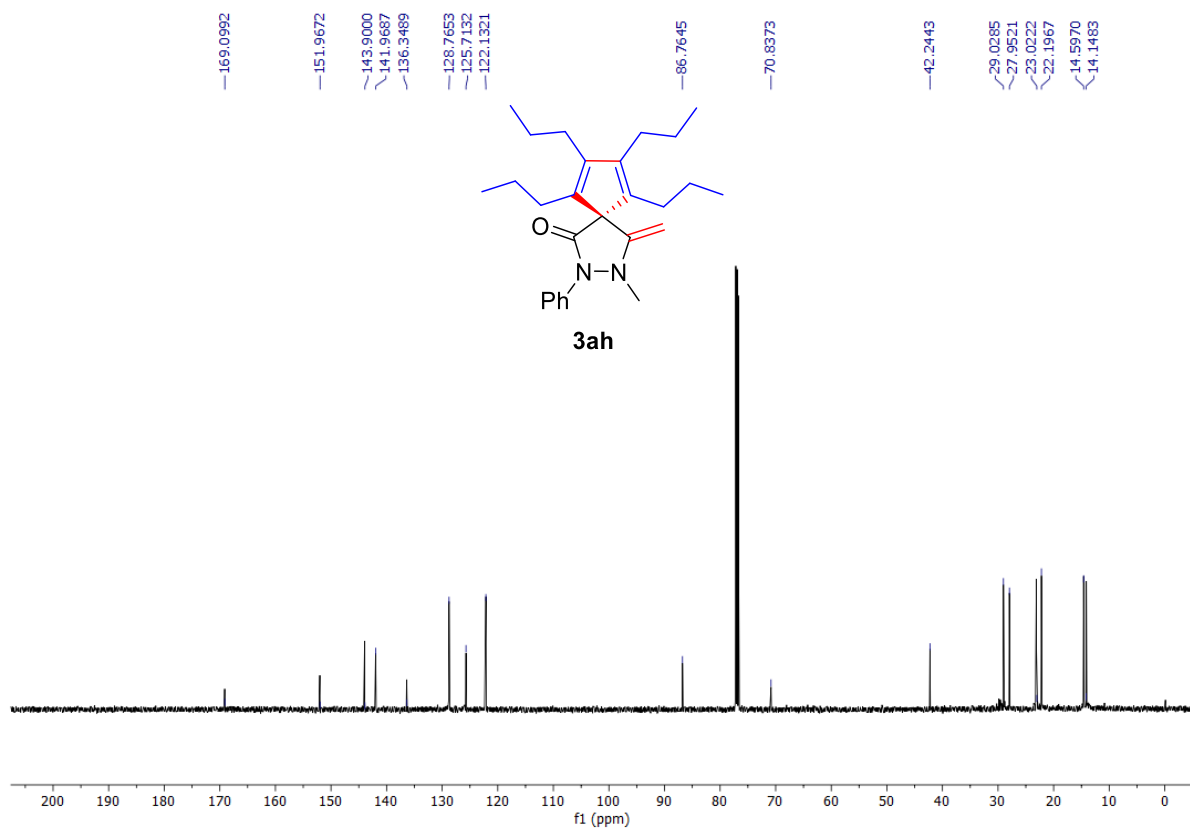

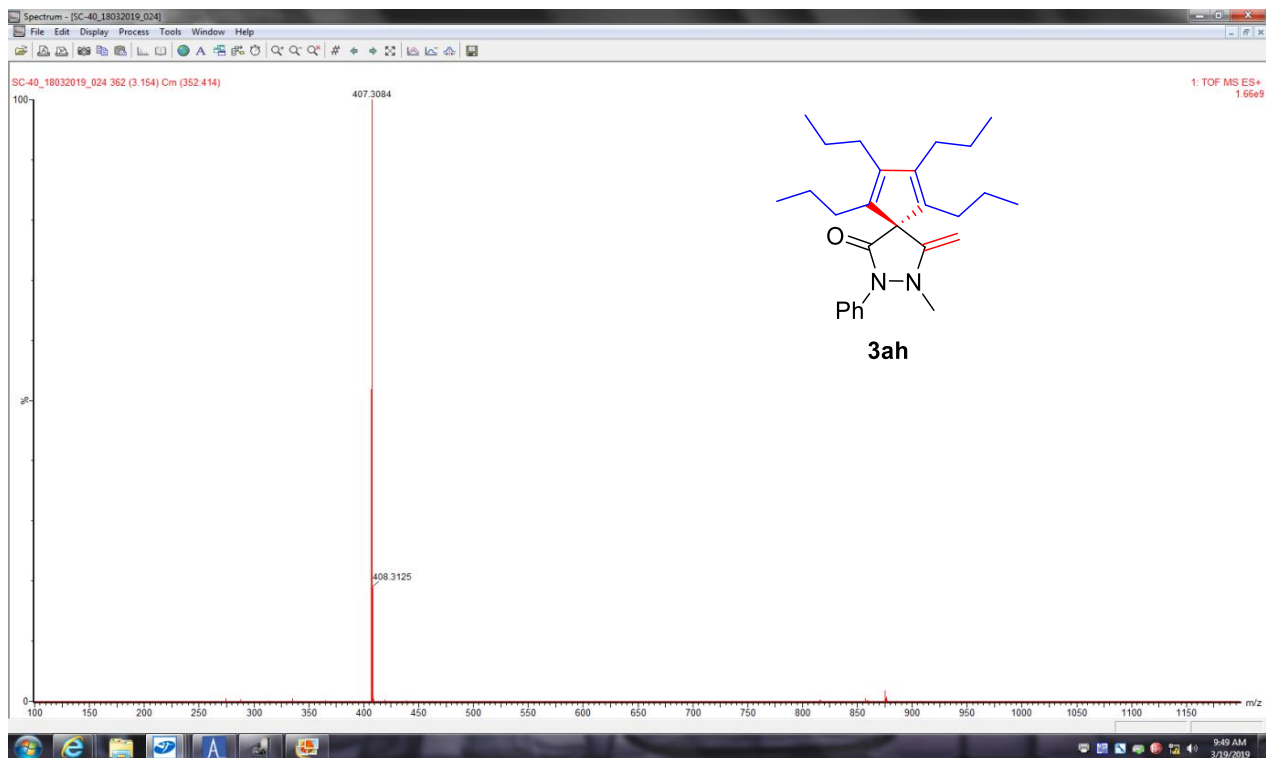



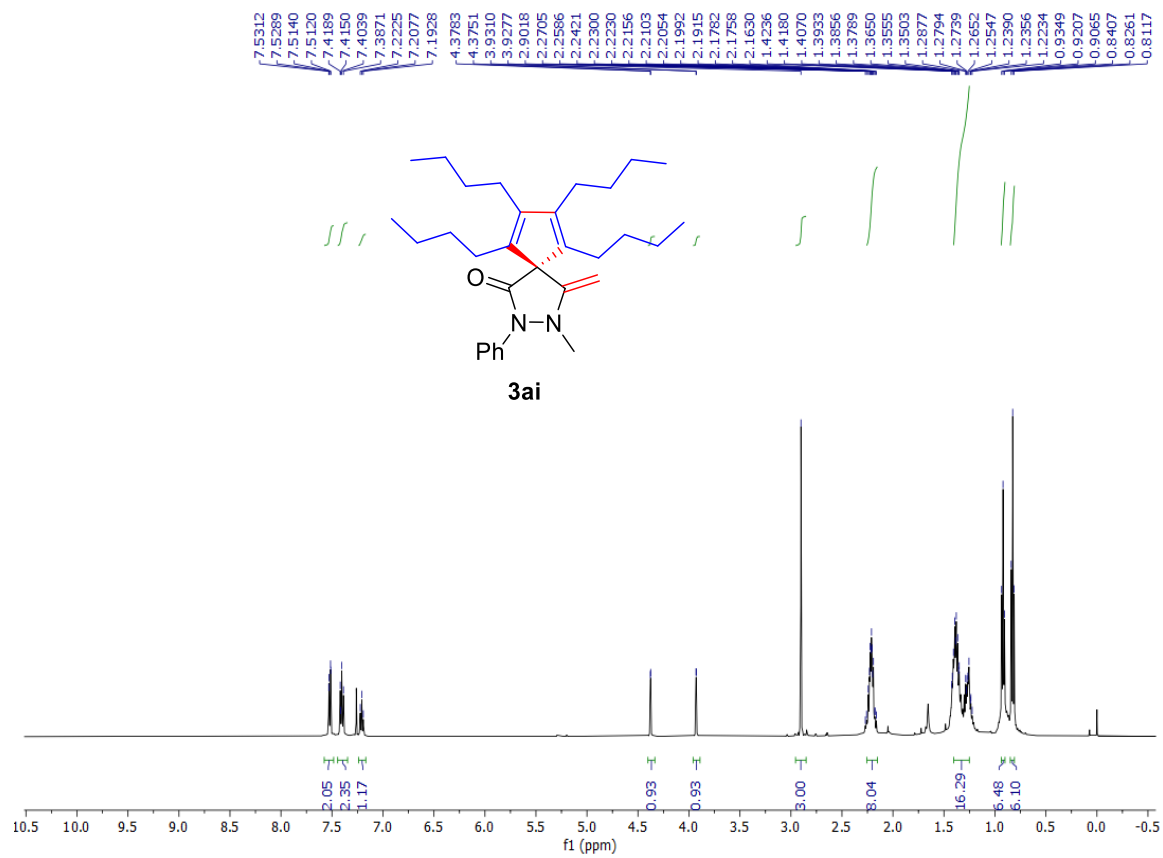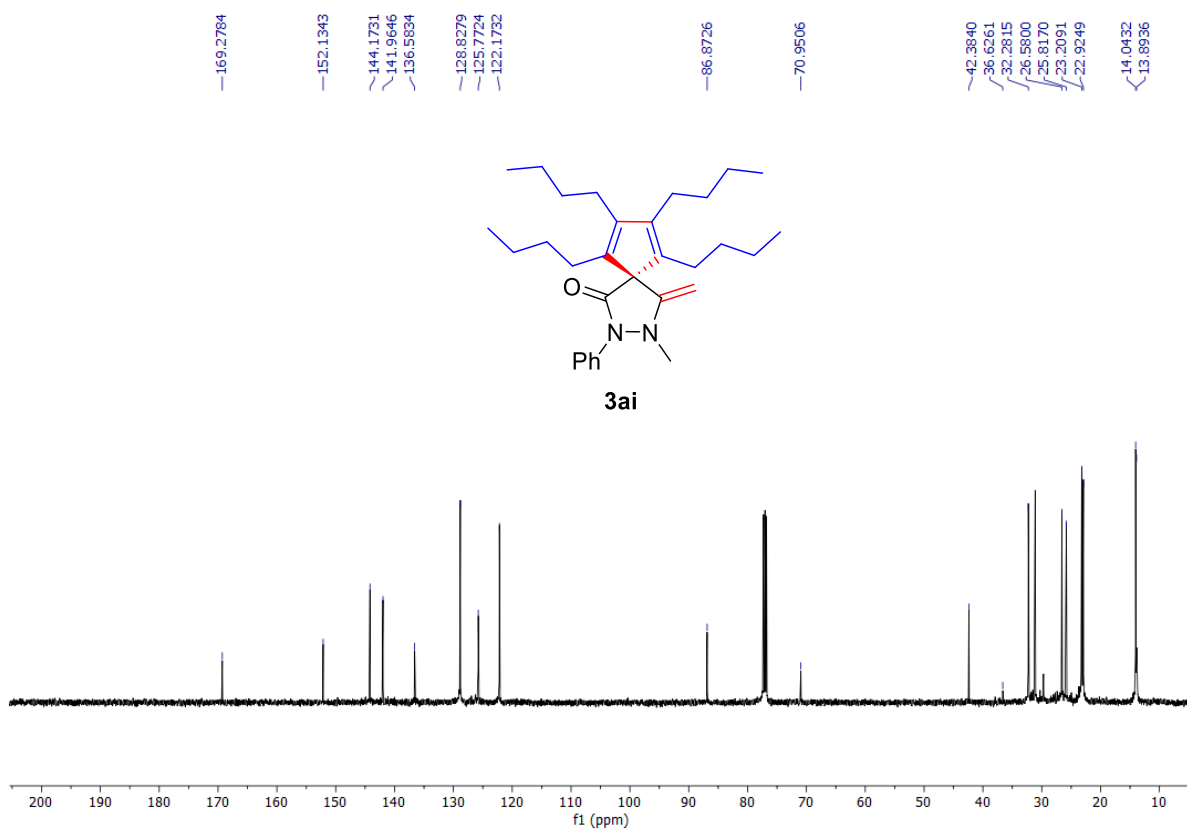

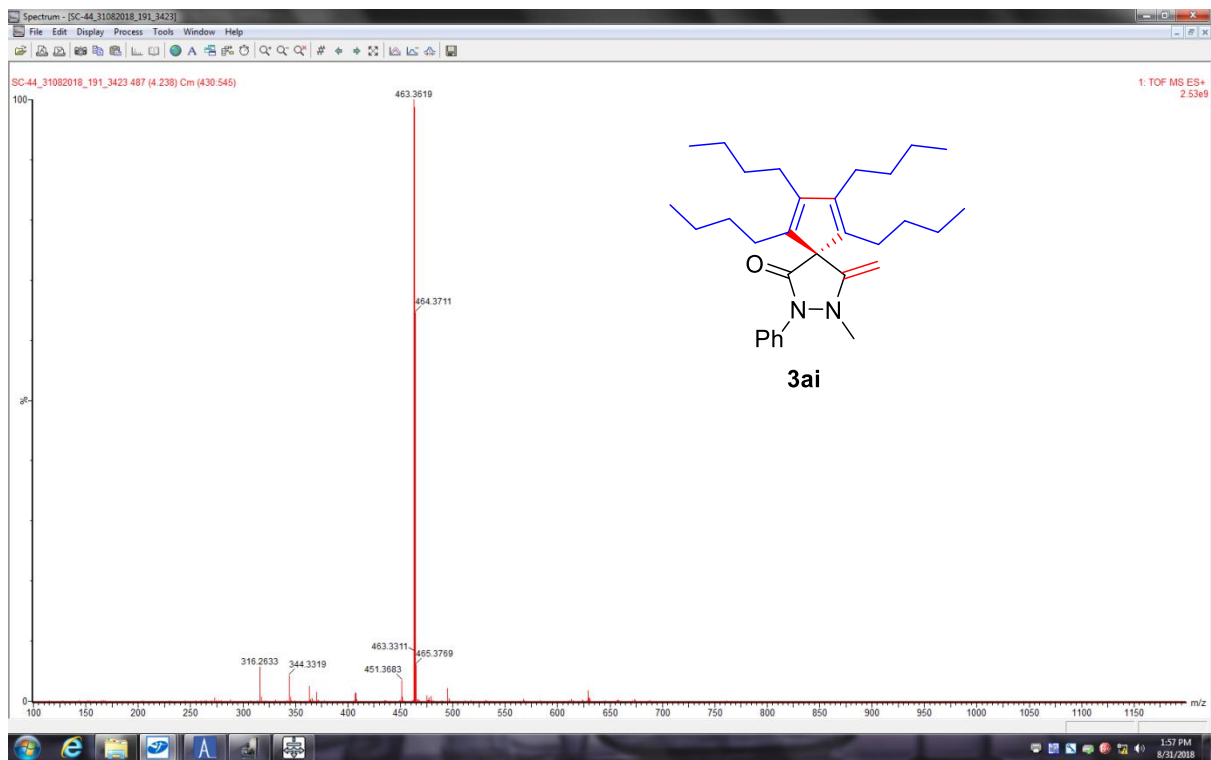

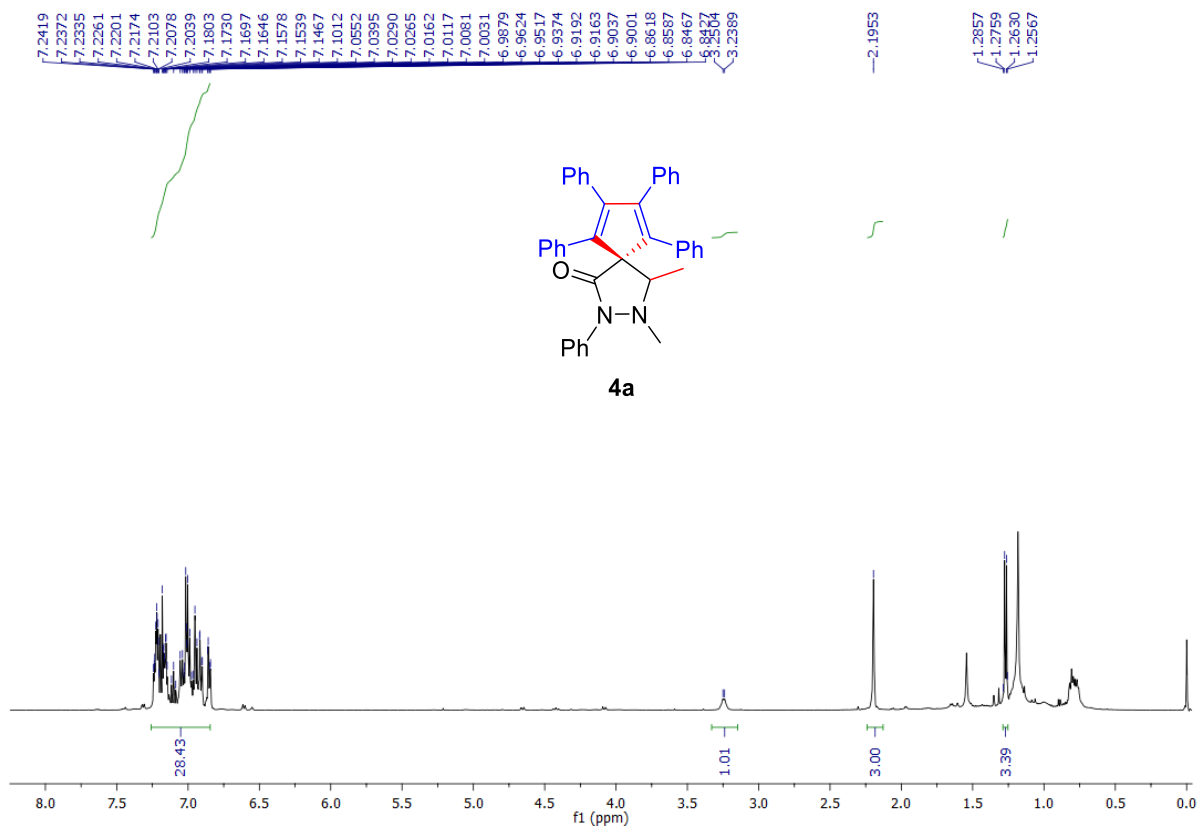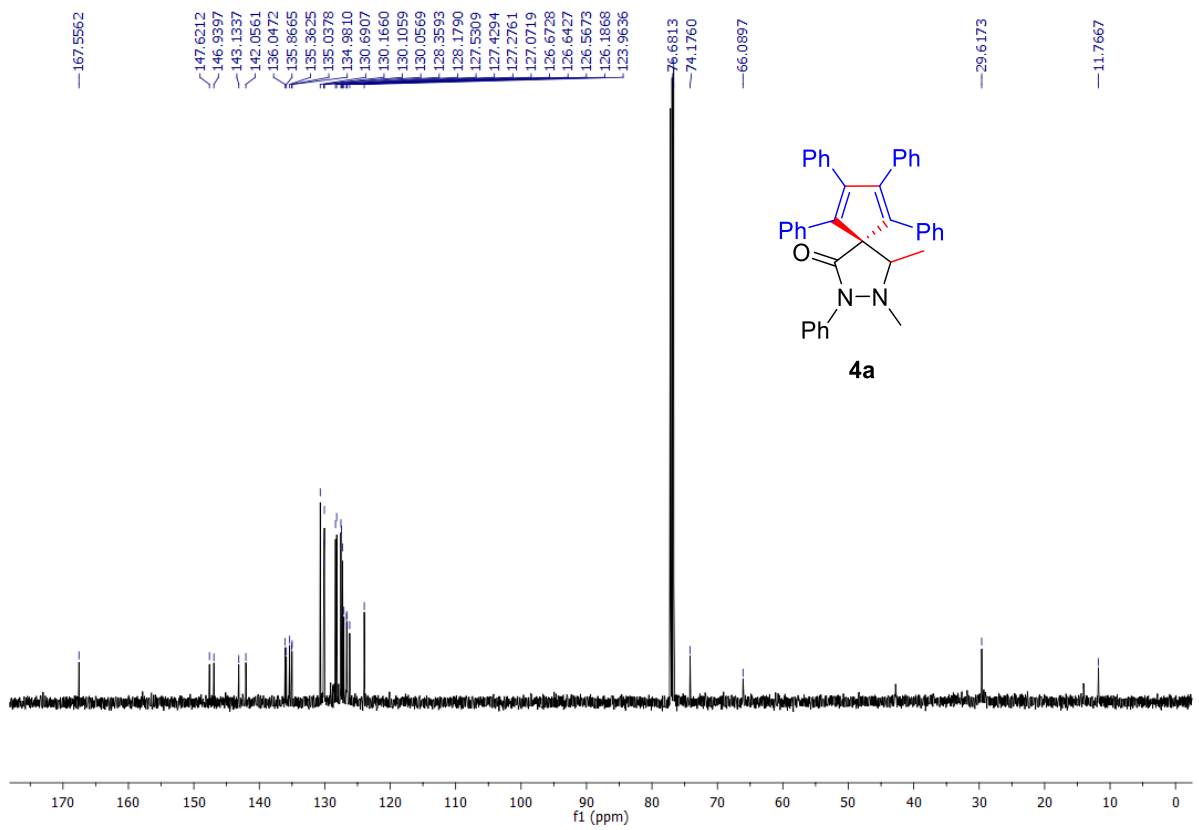

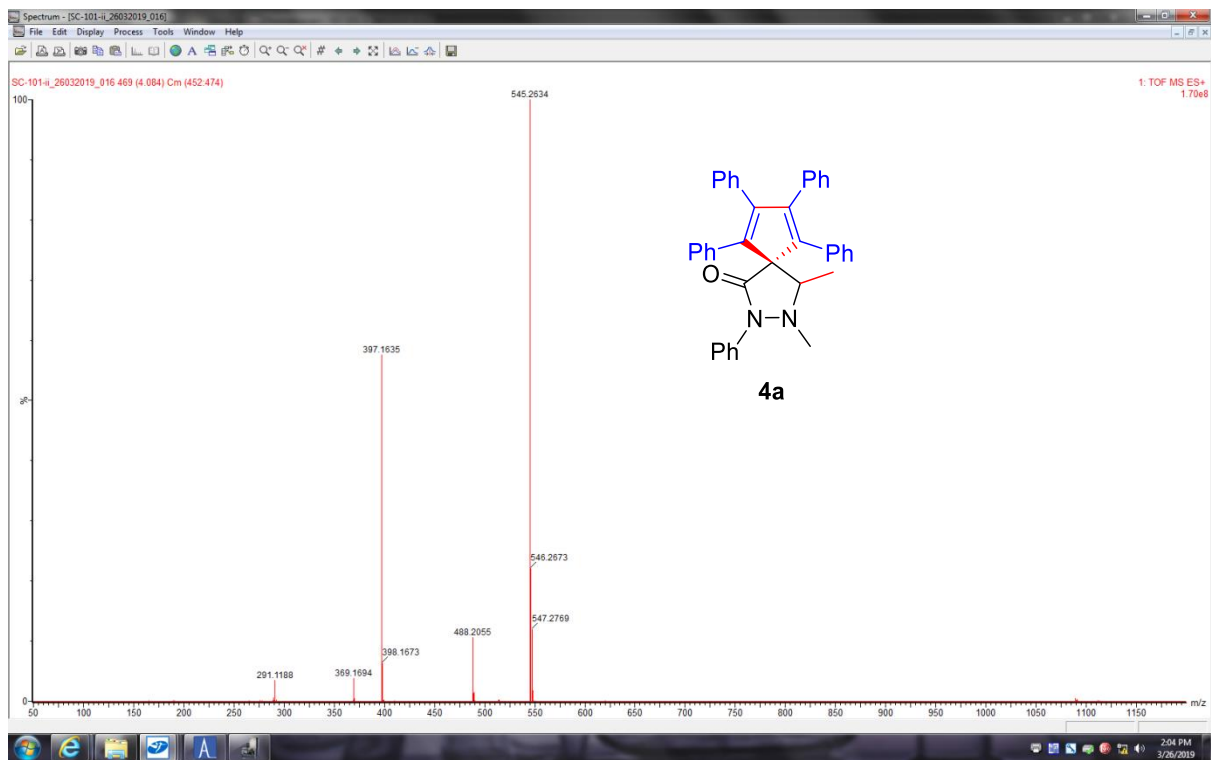

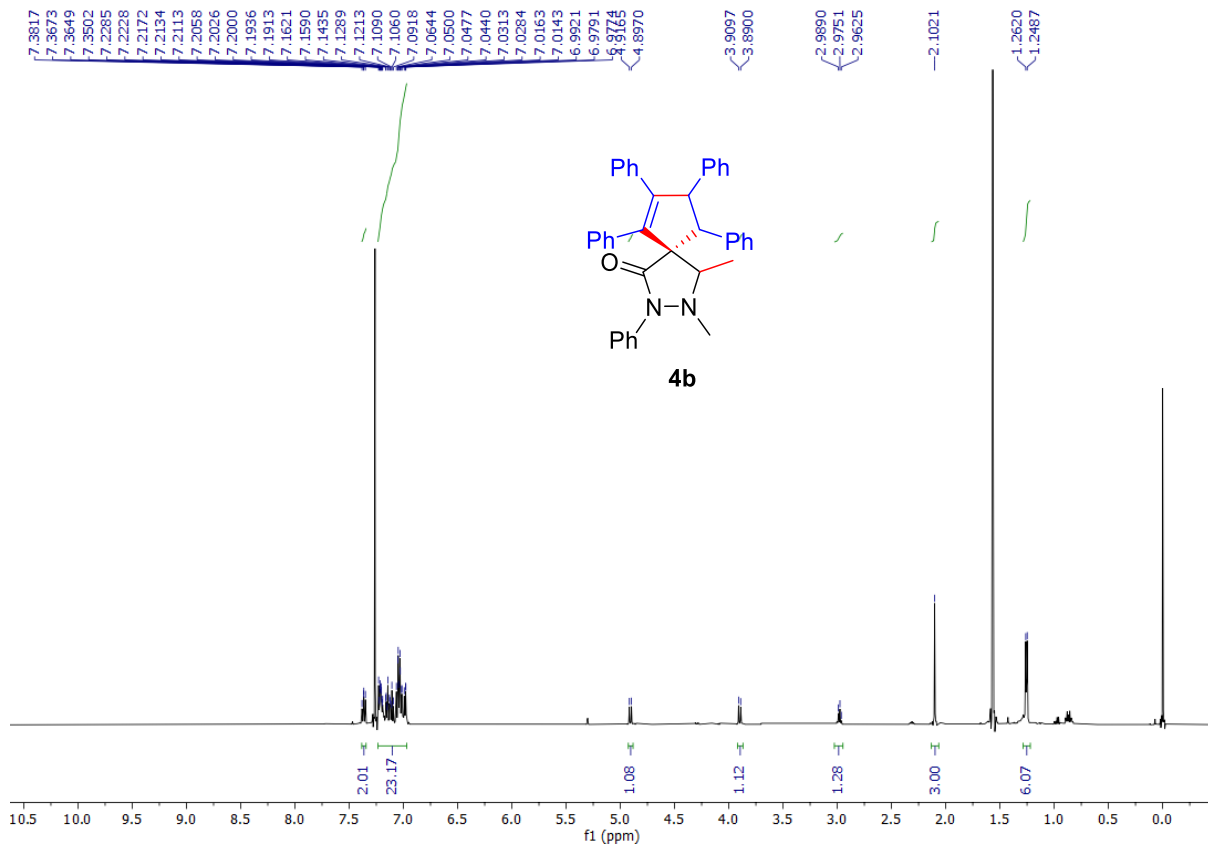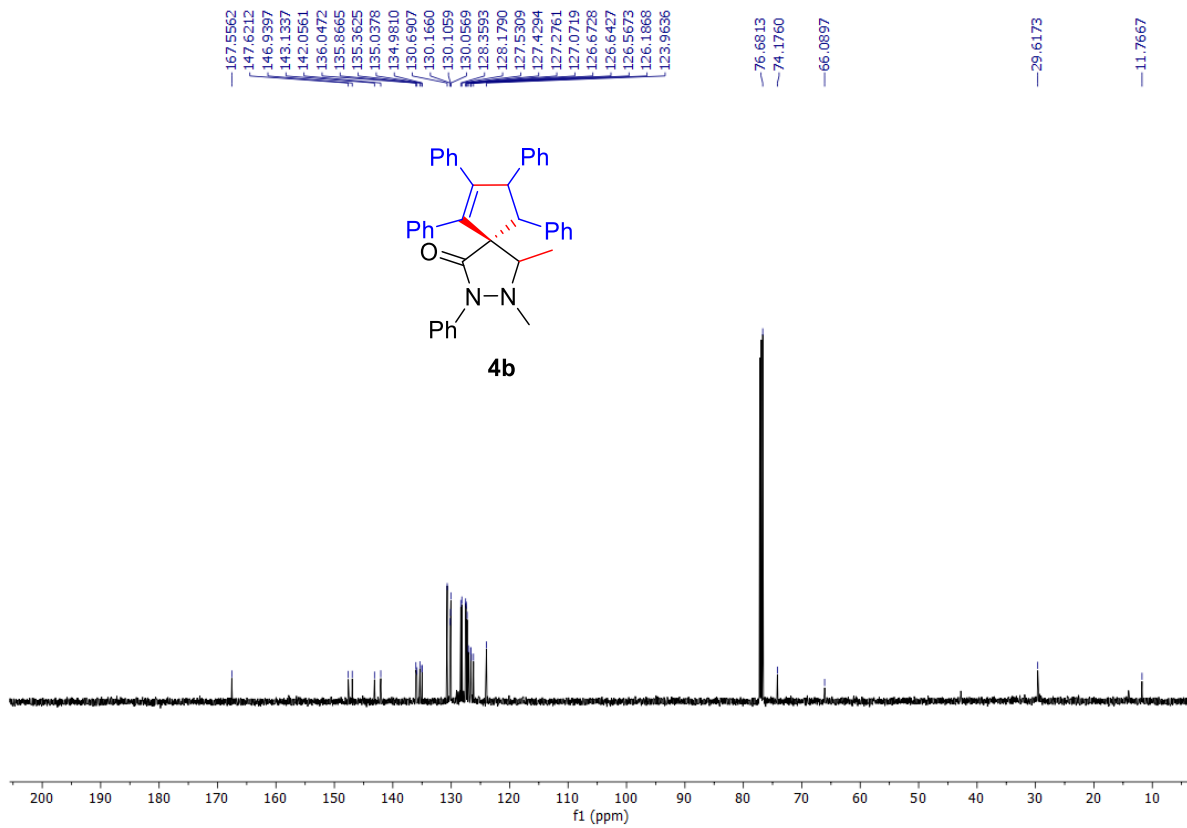

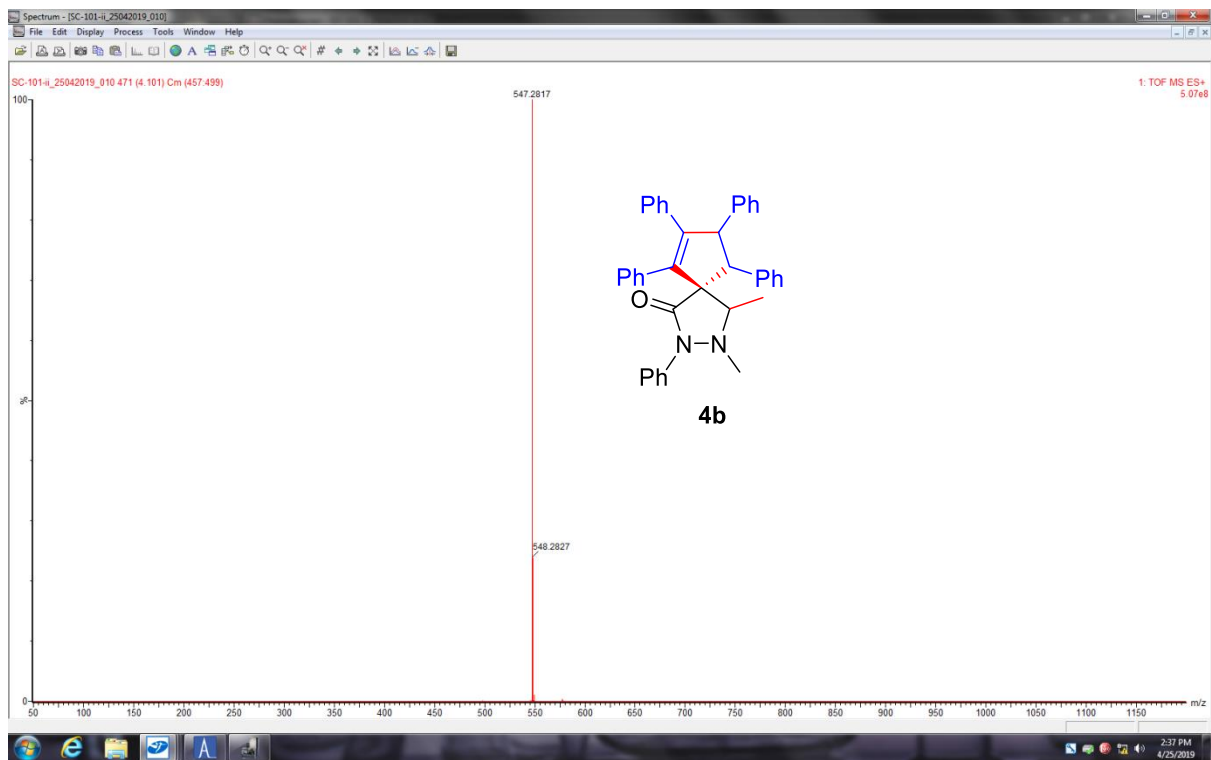

35695.1.fid  
Name of Sample: SC-116  
Spectrum No : 35695

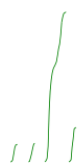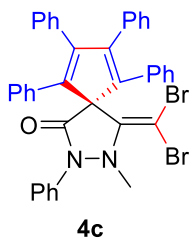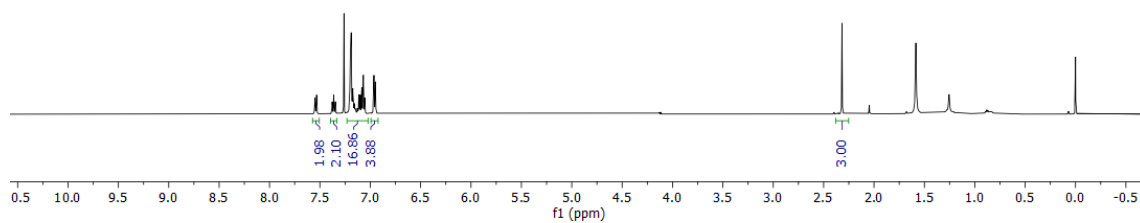

164.4960  
147.9440  
145.6189  
139.4048  
135.3646  
134.6322  
134.5231  
129.6627  
129.2879  
128.9504  
128.1337  
127.5443  
127.4124  
126.9860  
126.1402  
121.3591

73.9383

41.3945

29.6087

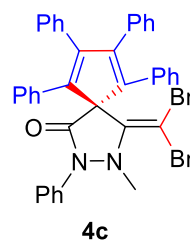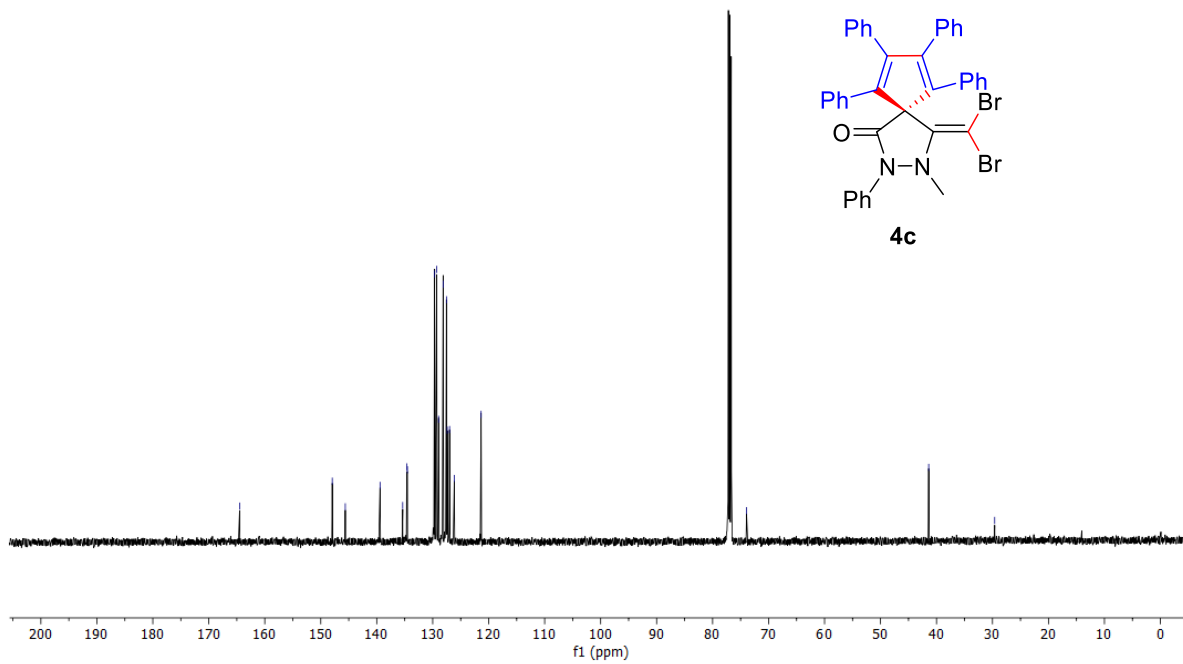

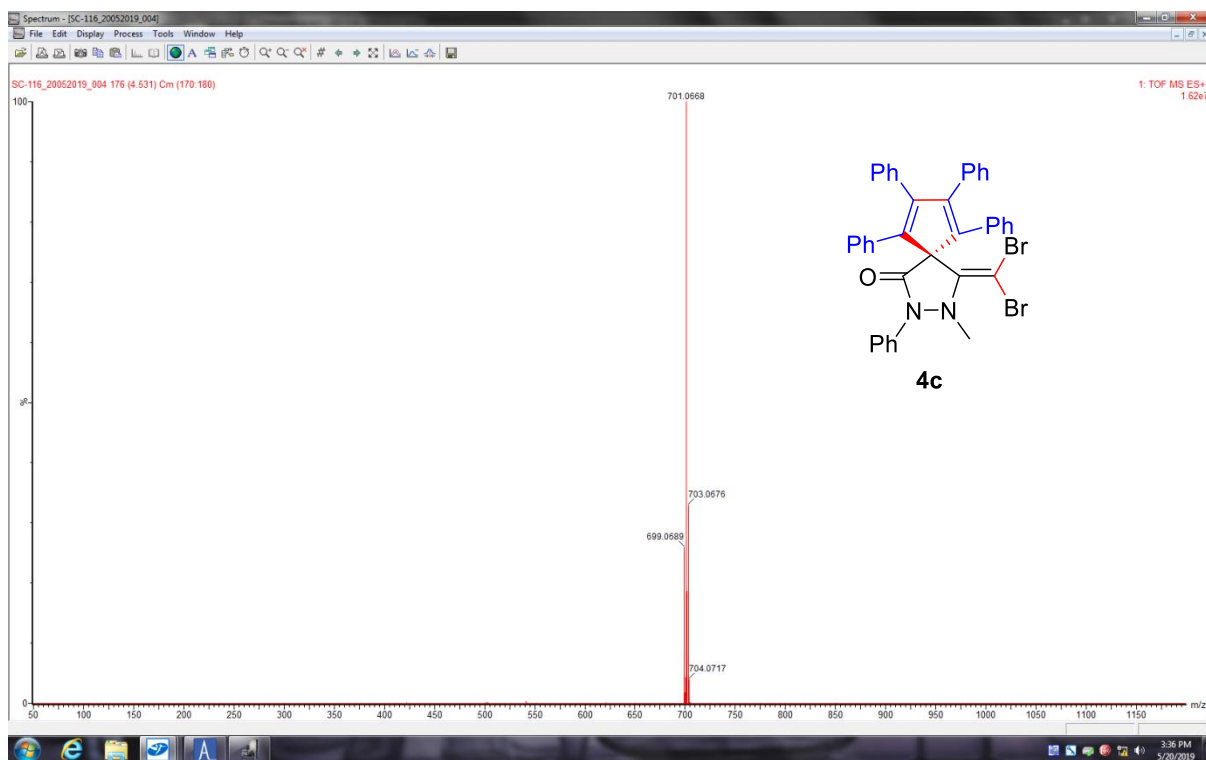



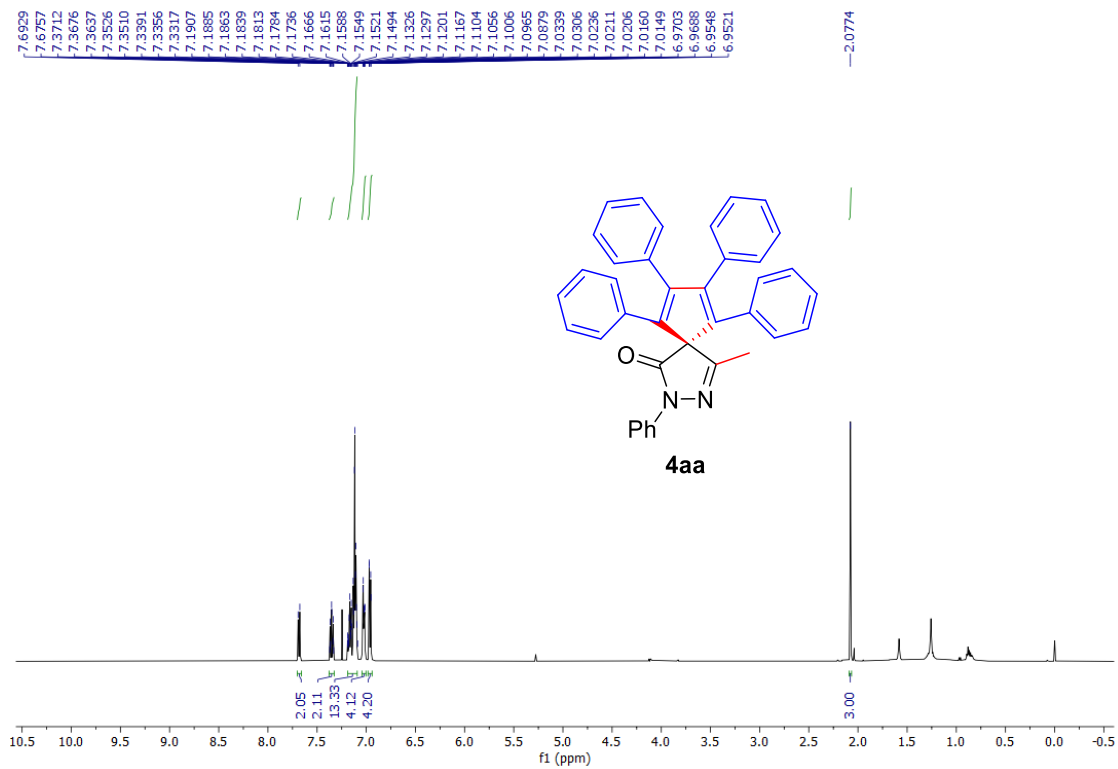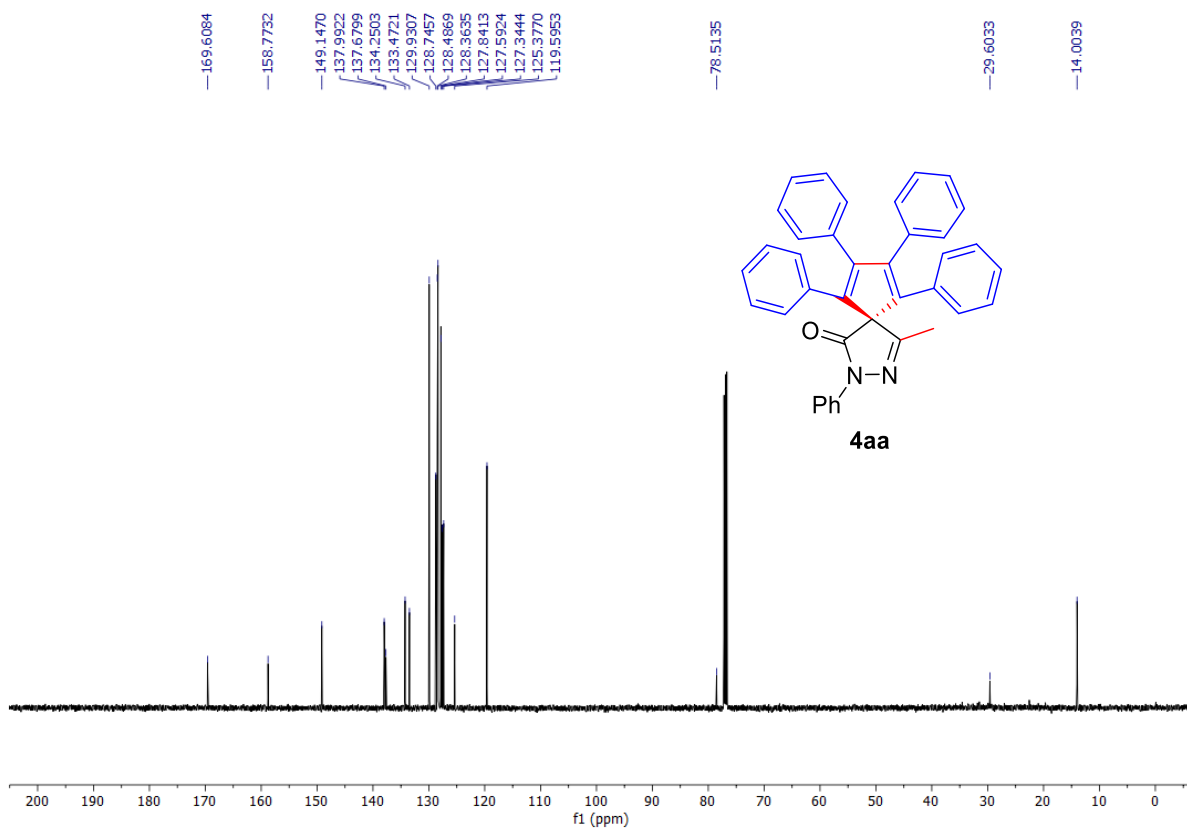

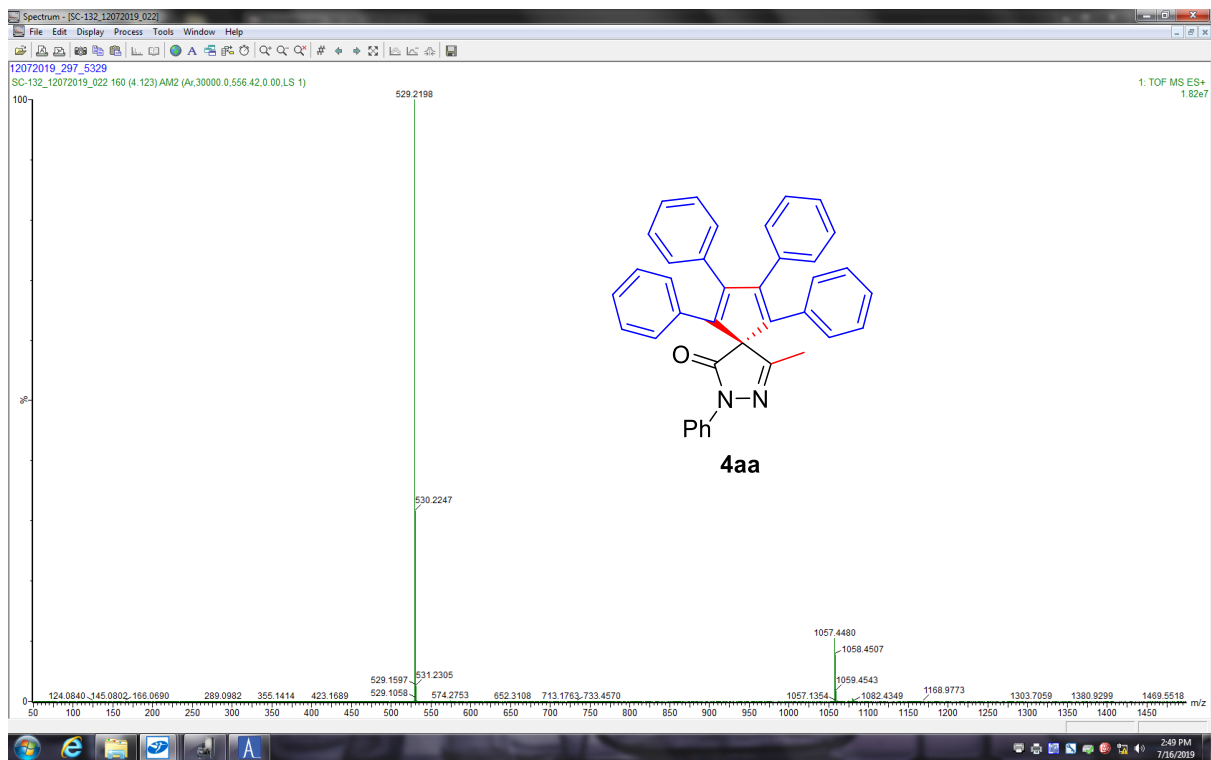

33678  
Name of Sample: SC-135  
Spectrum No :33678

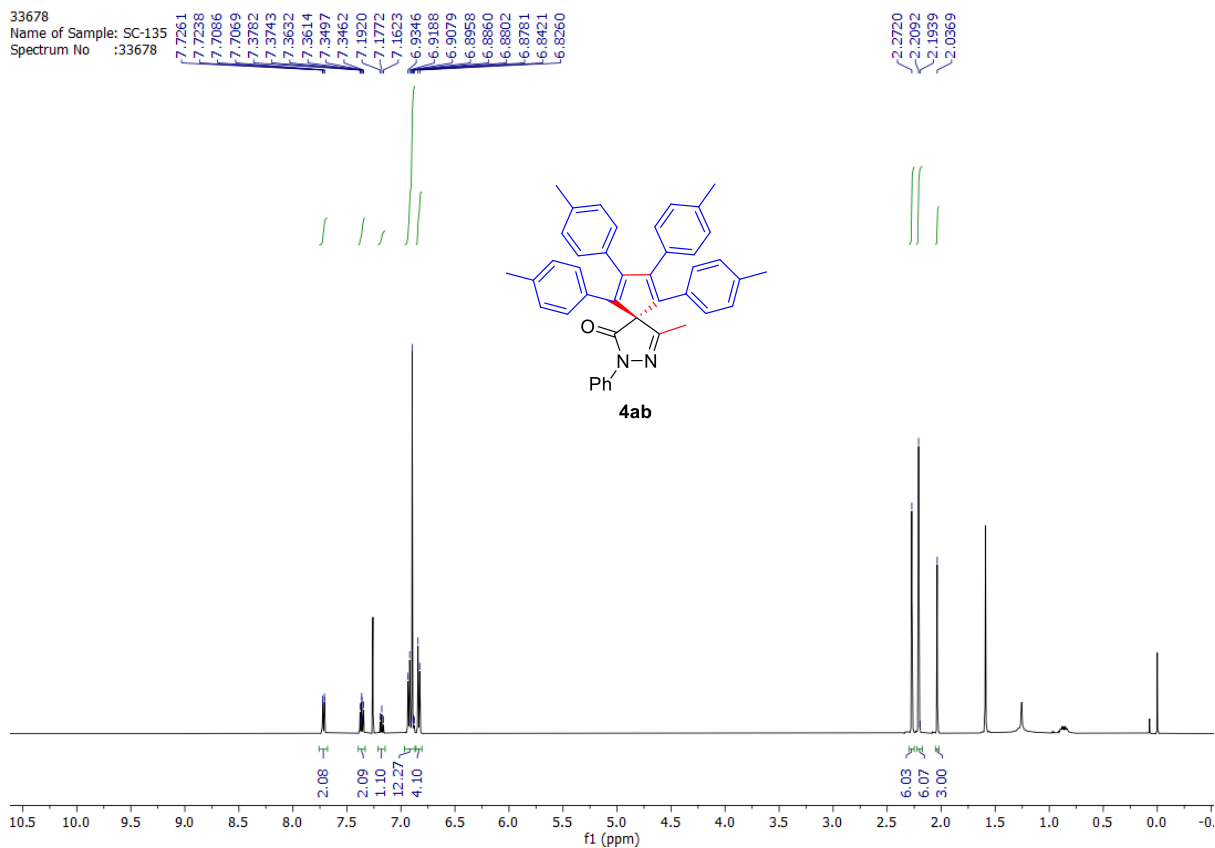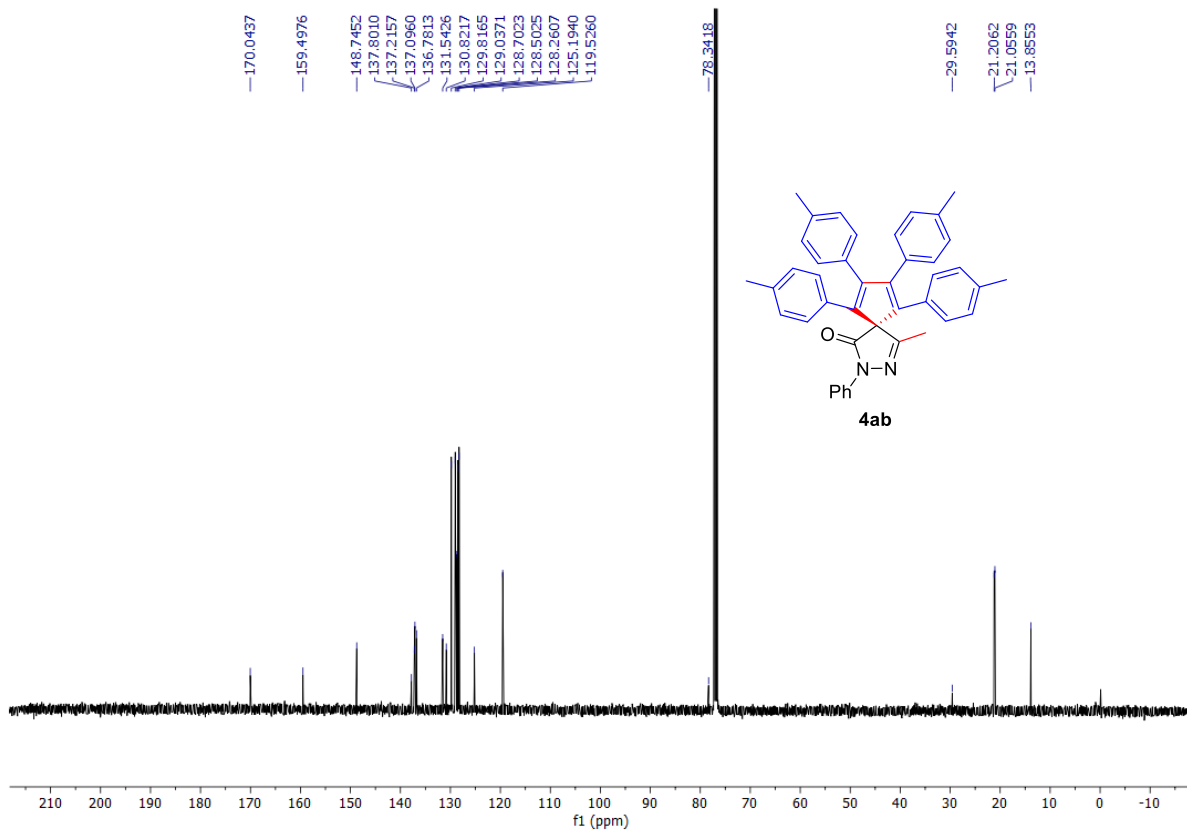

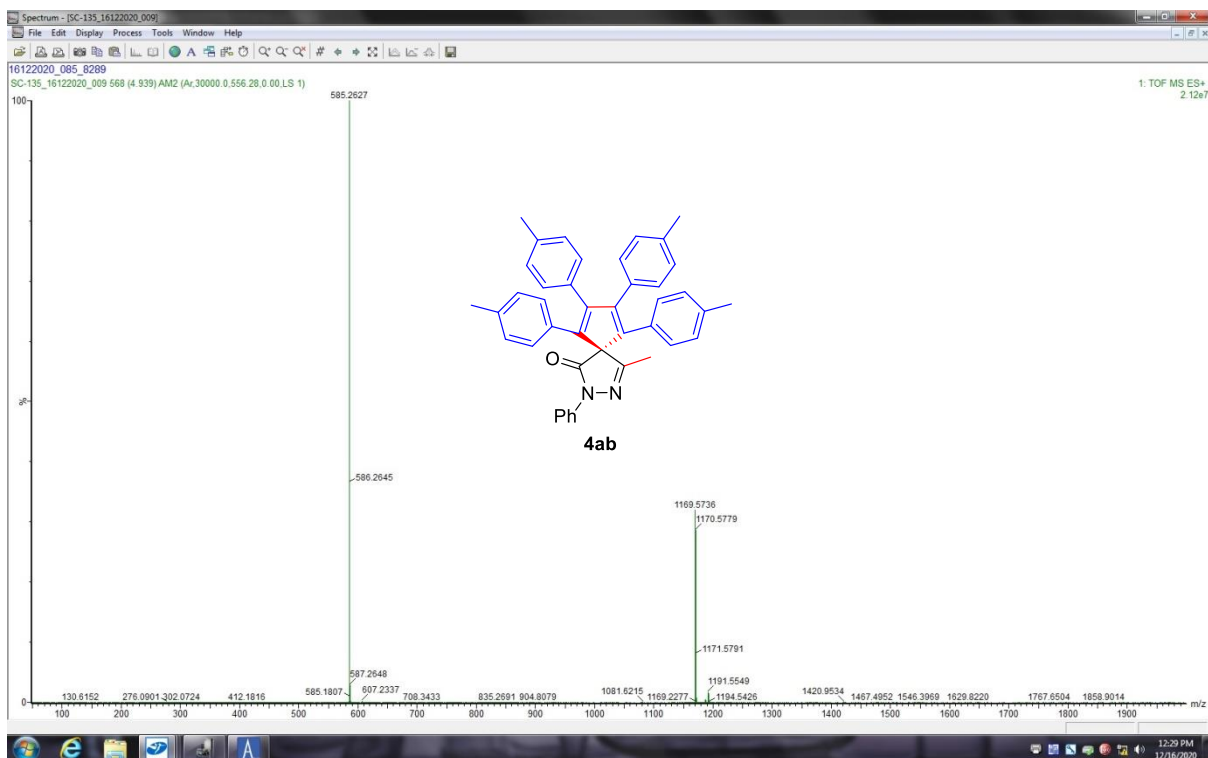

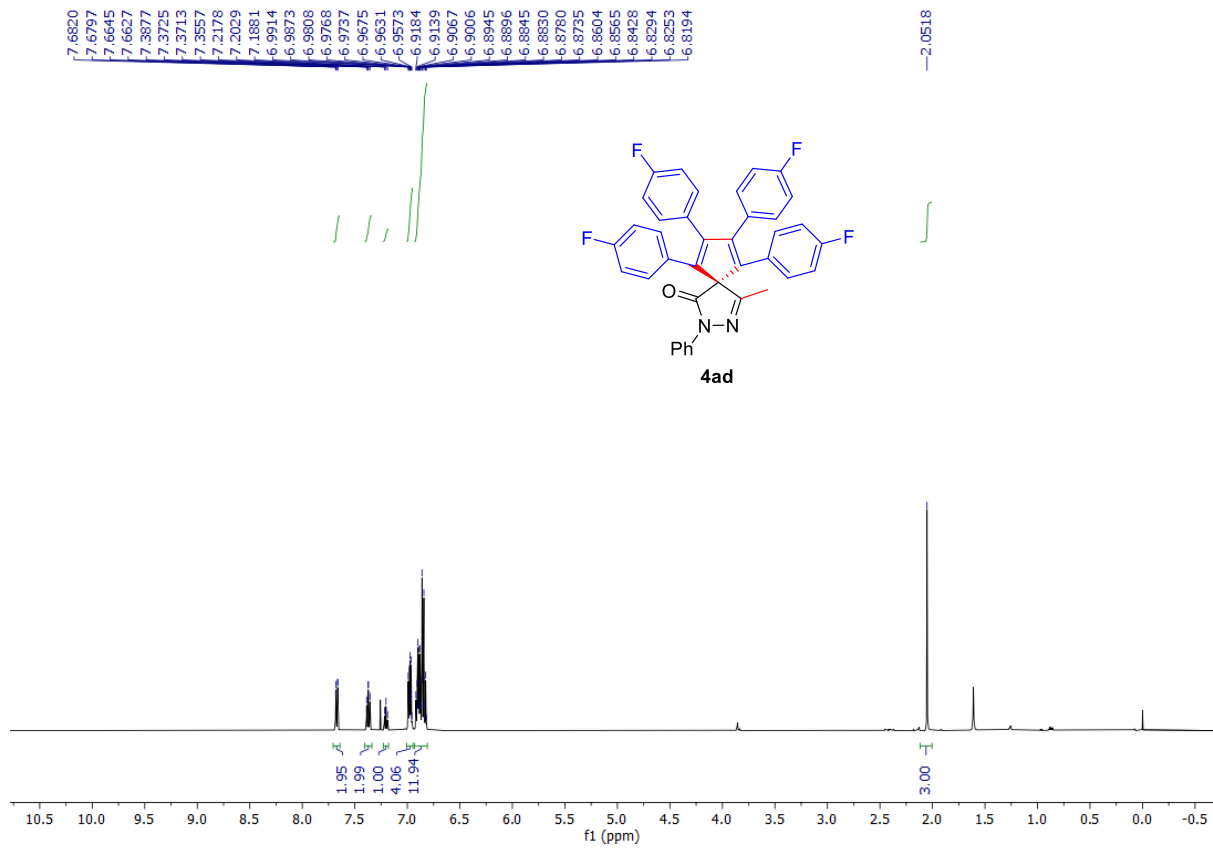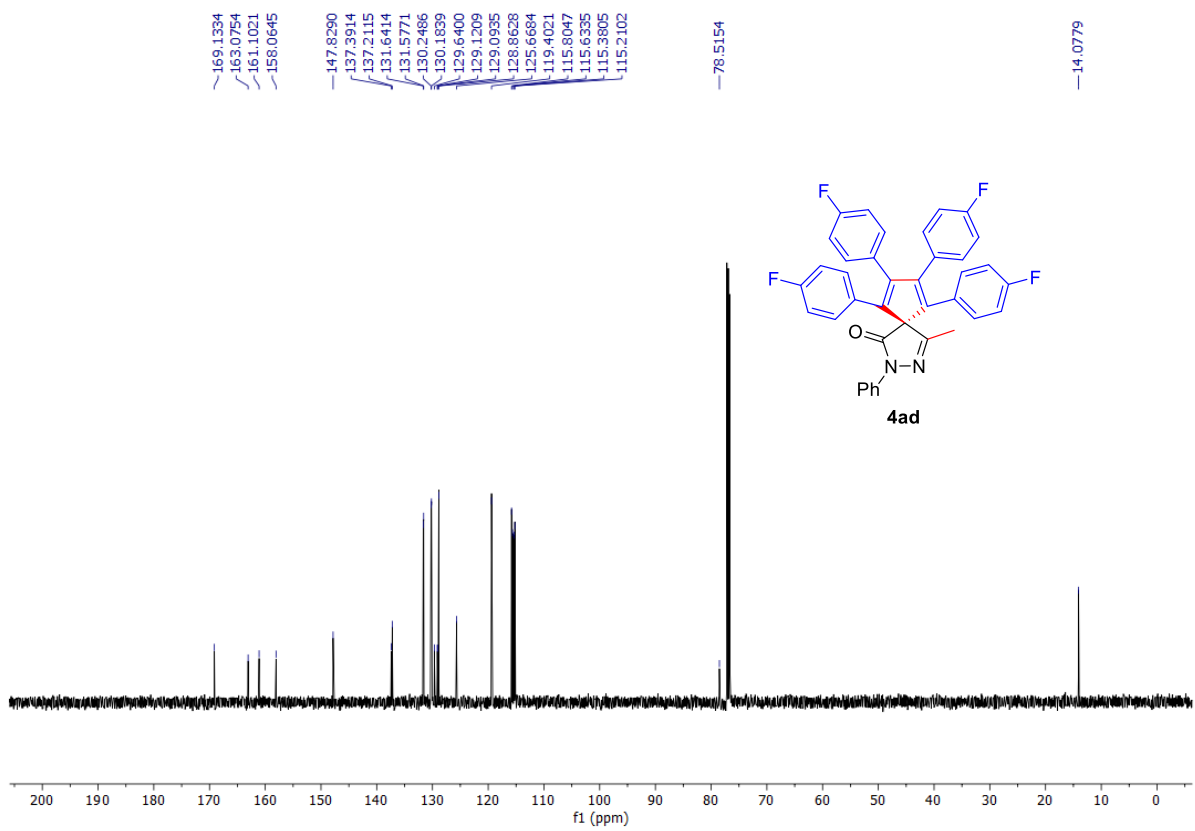

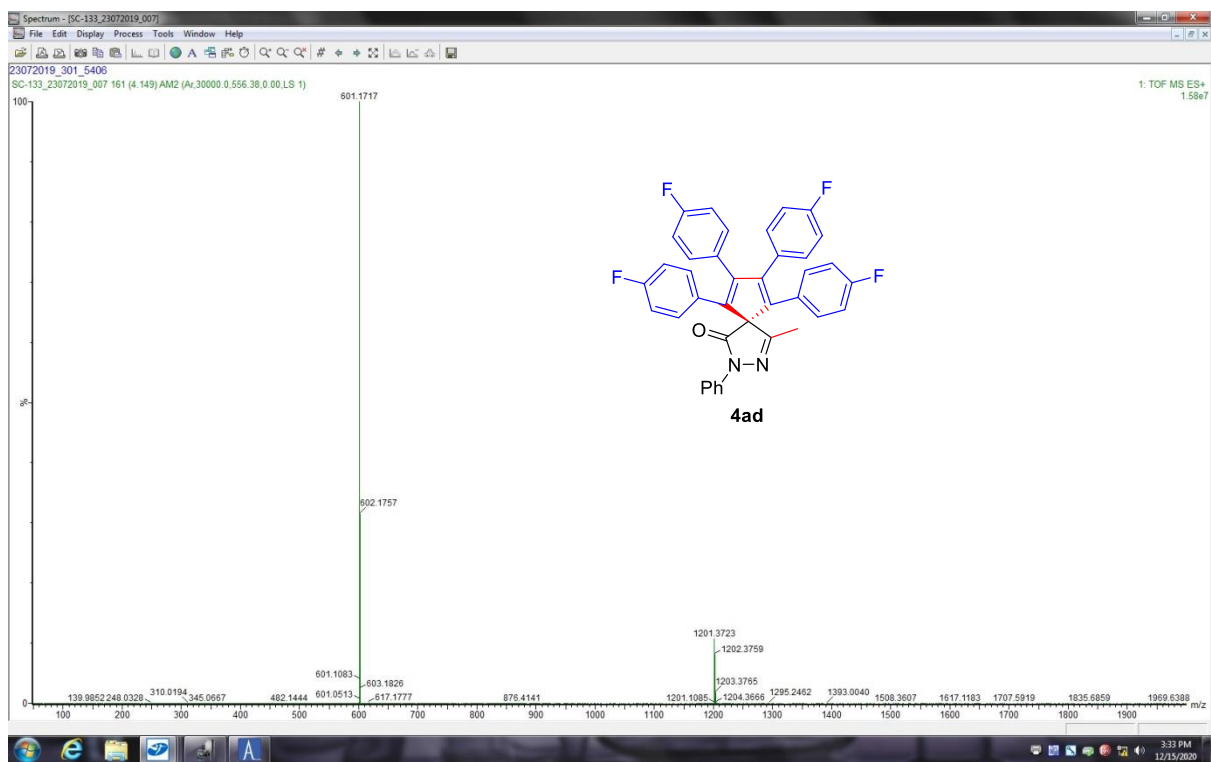

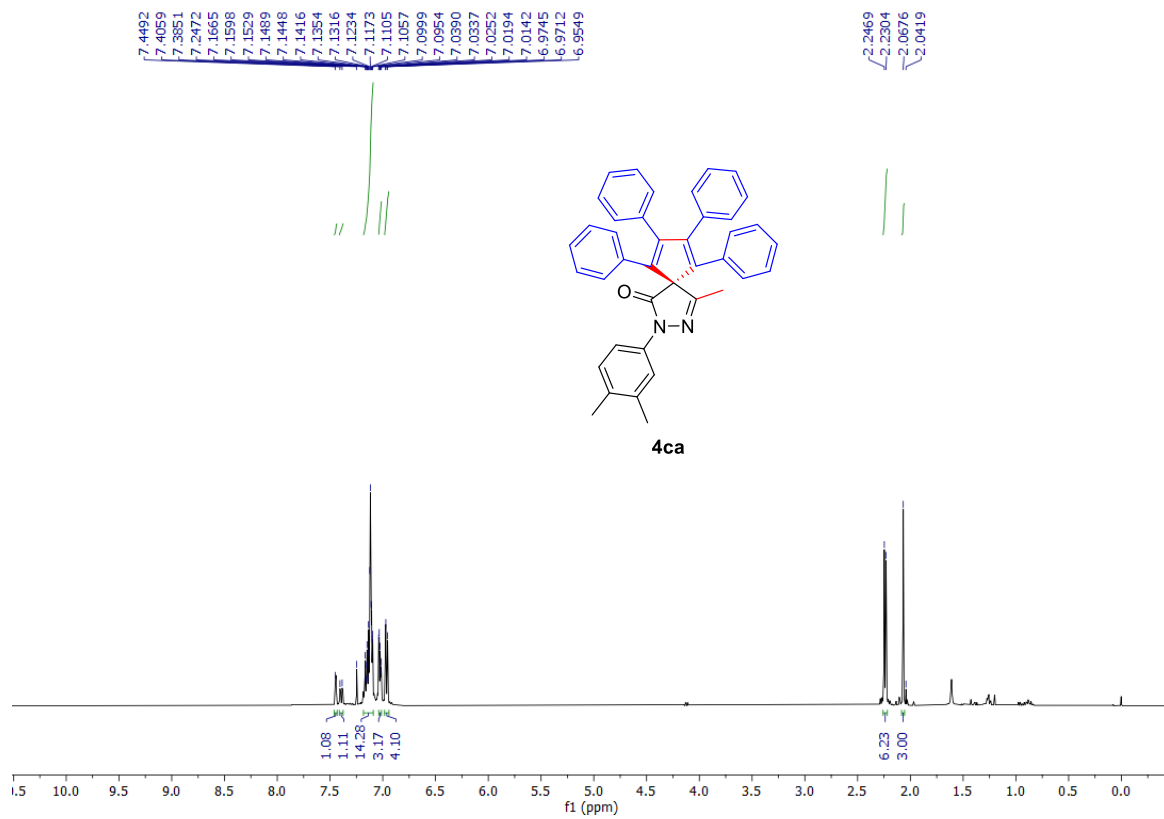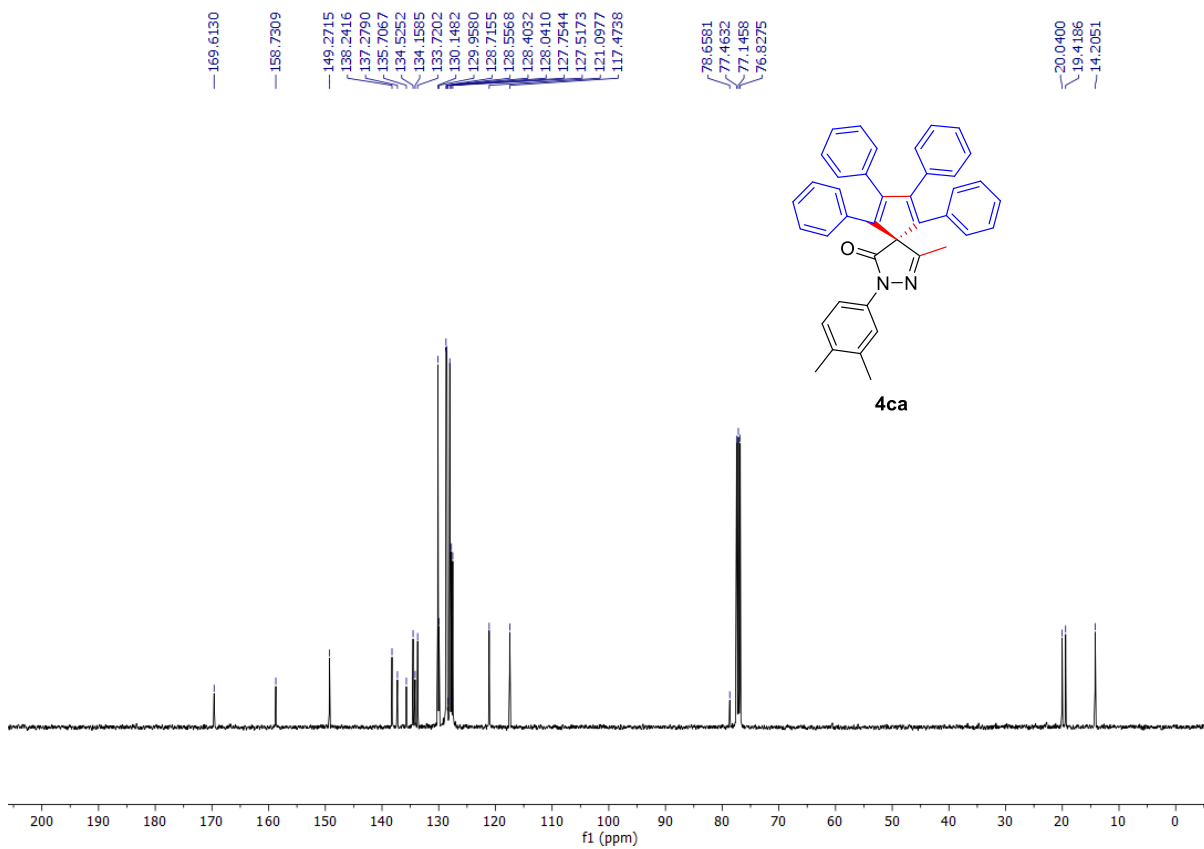

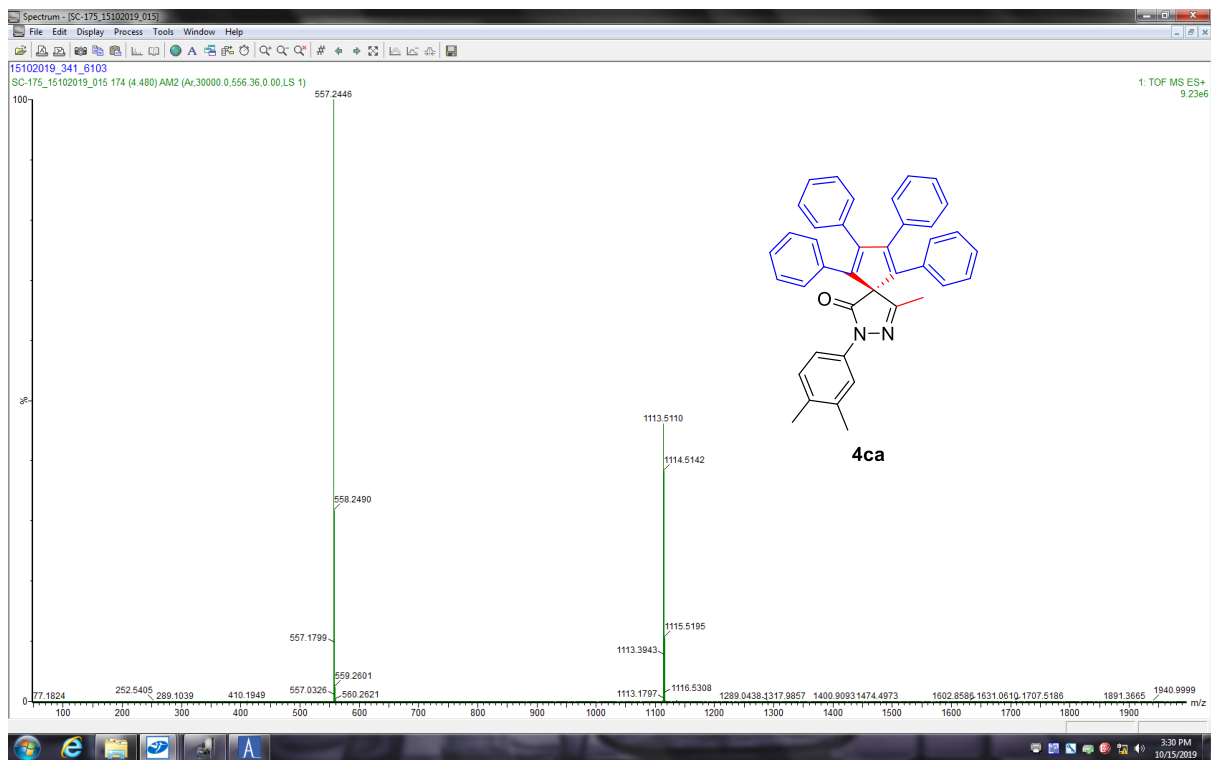



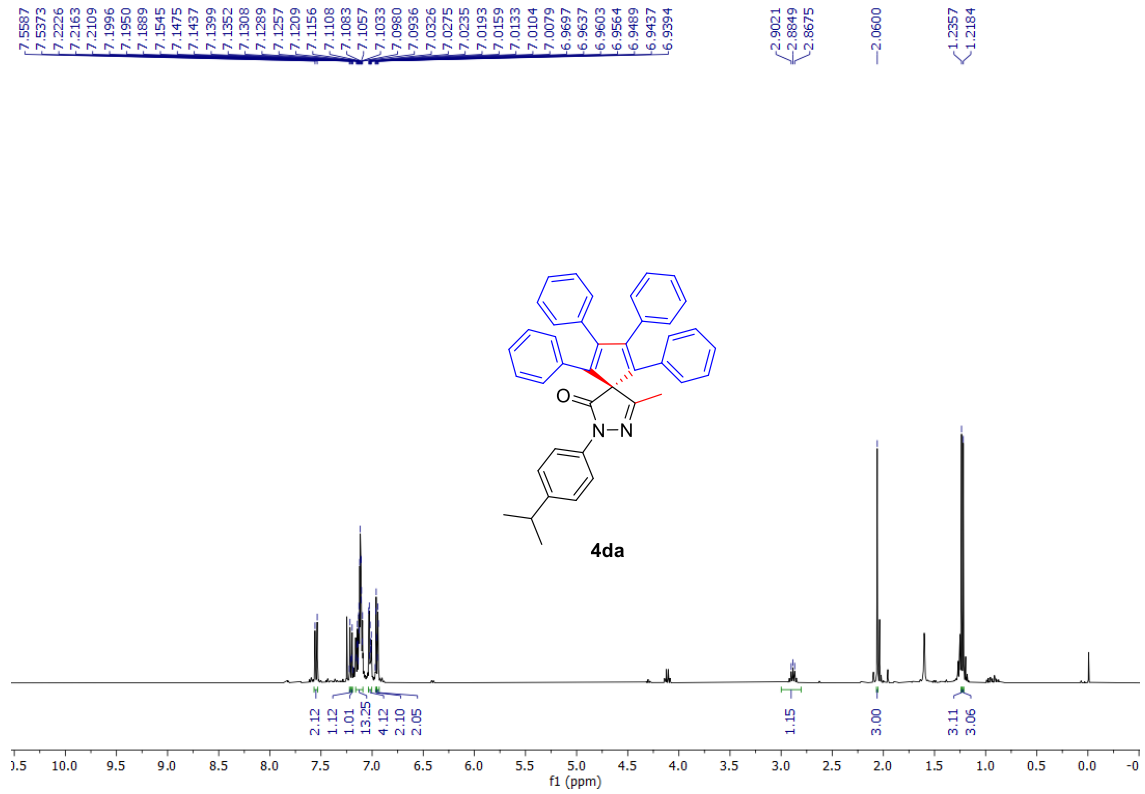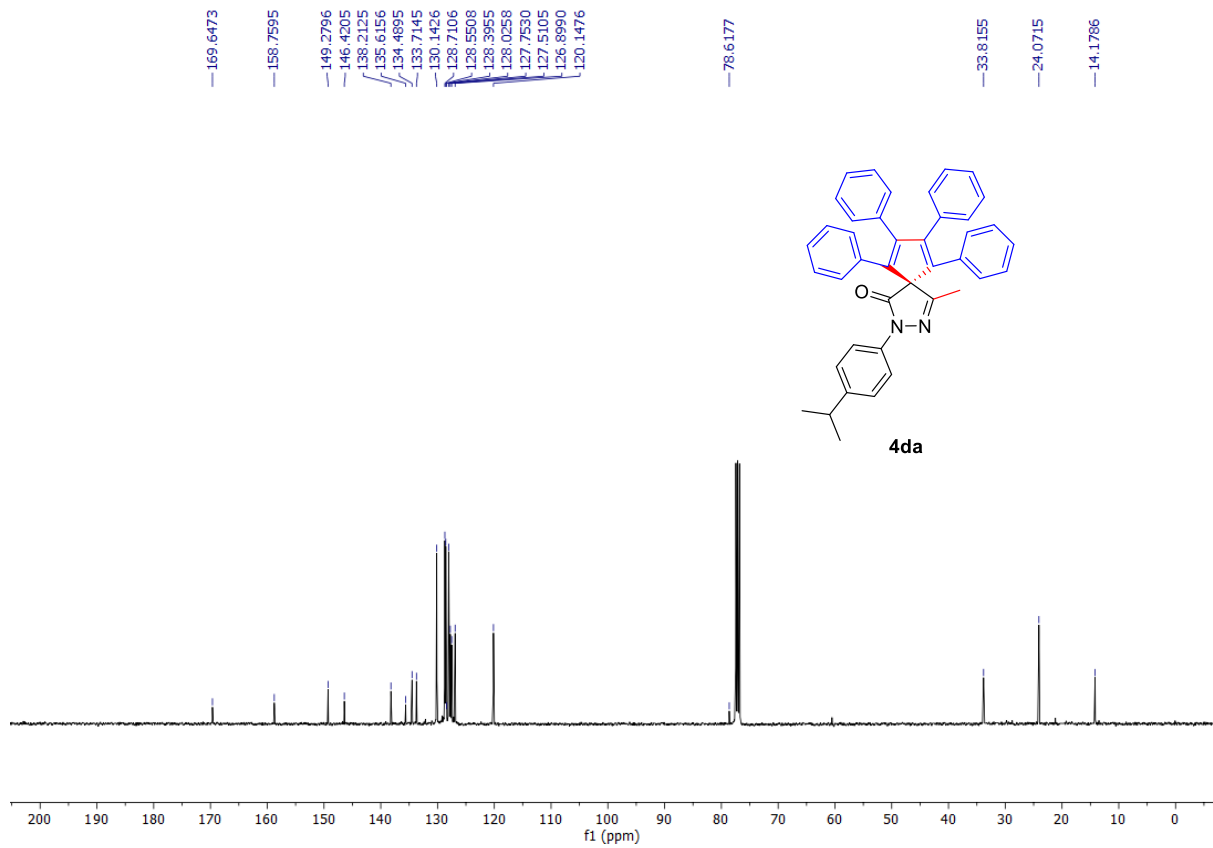

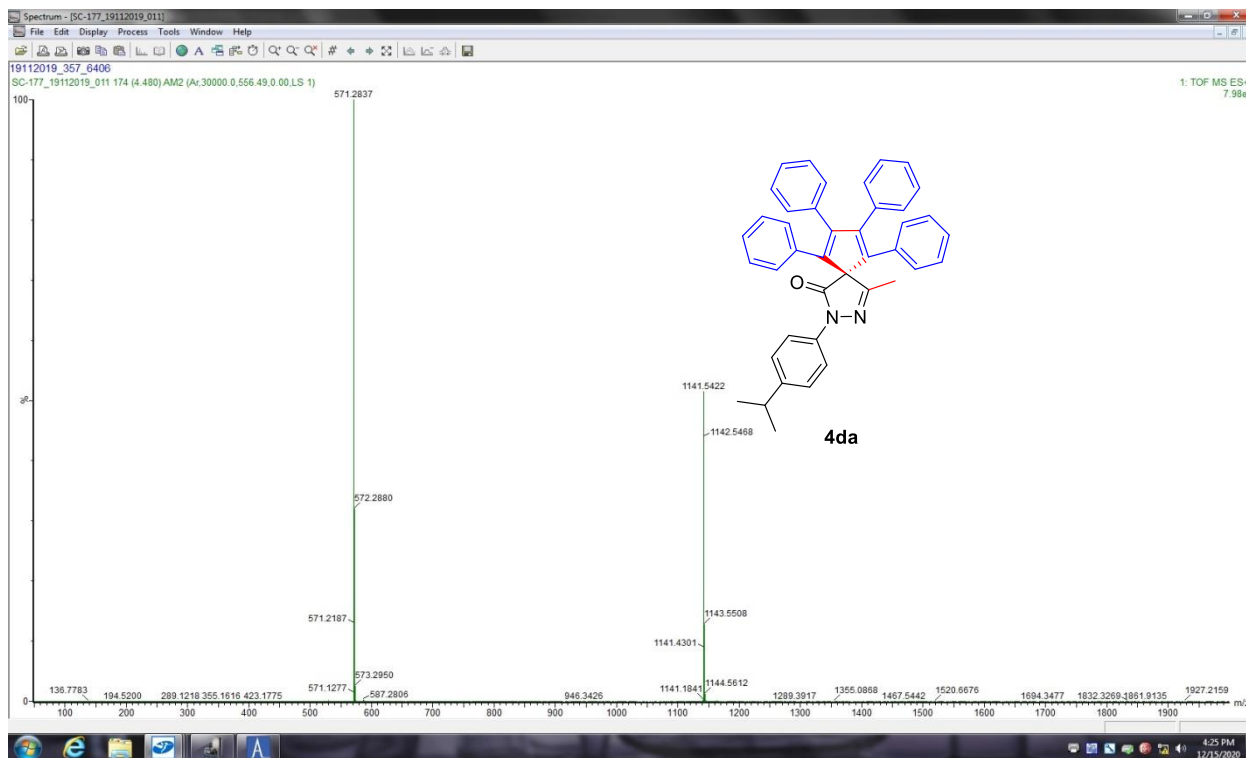

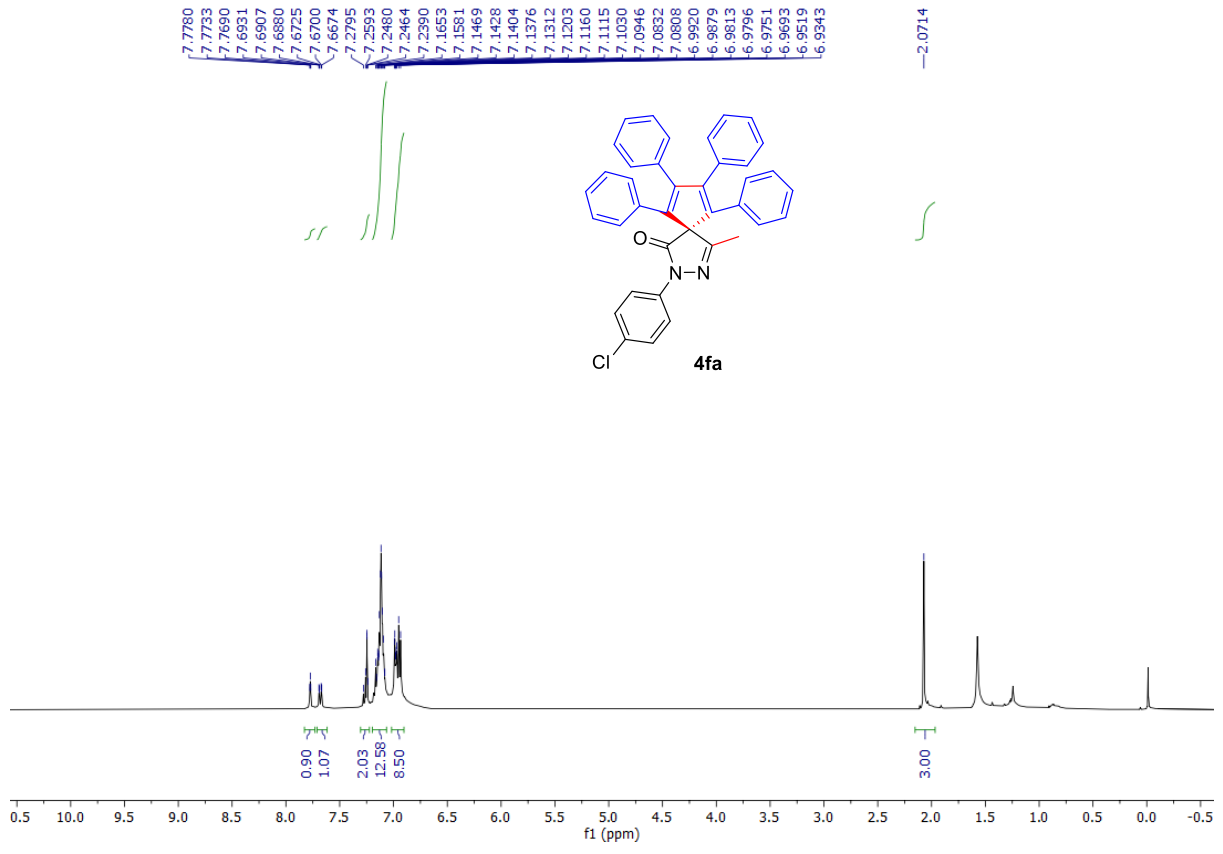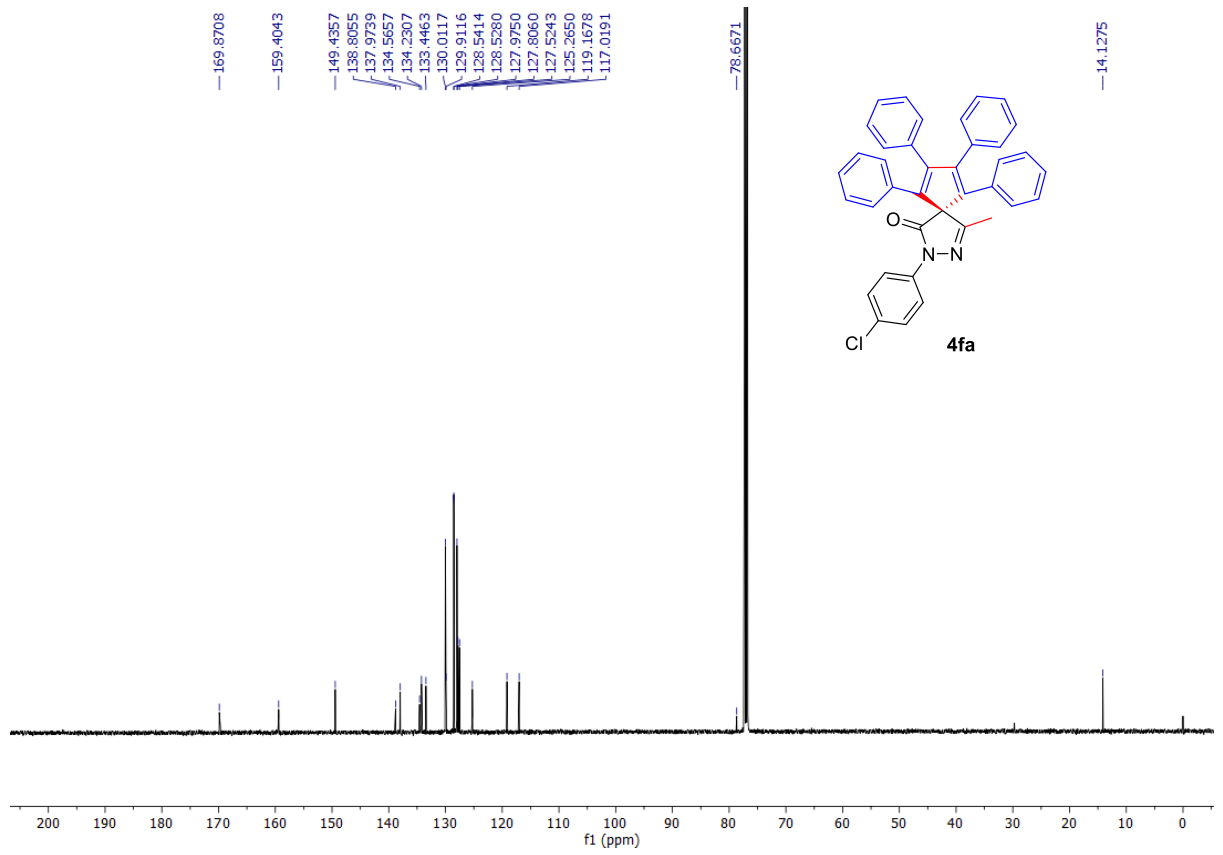

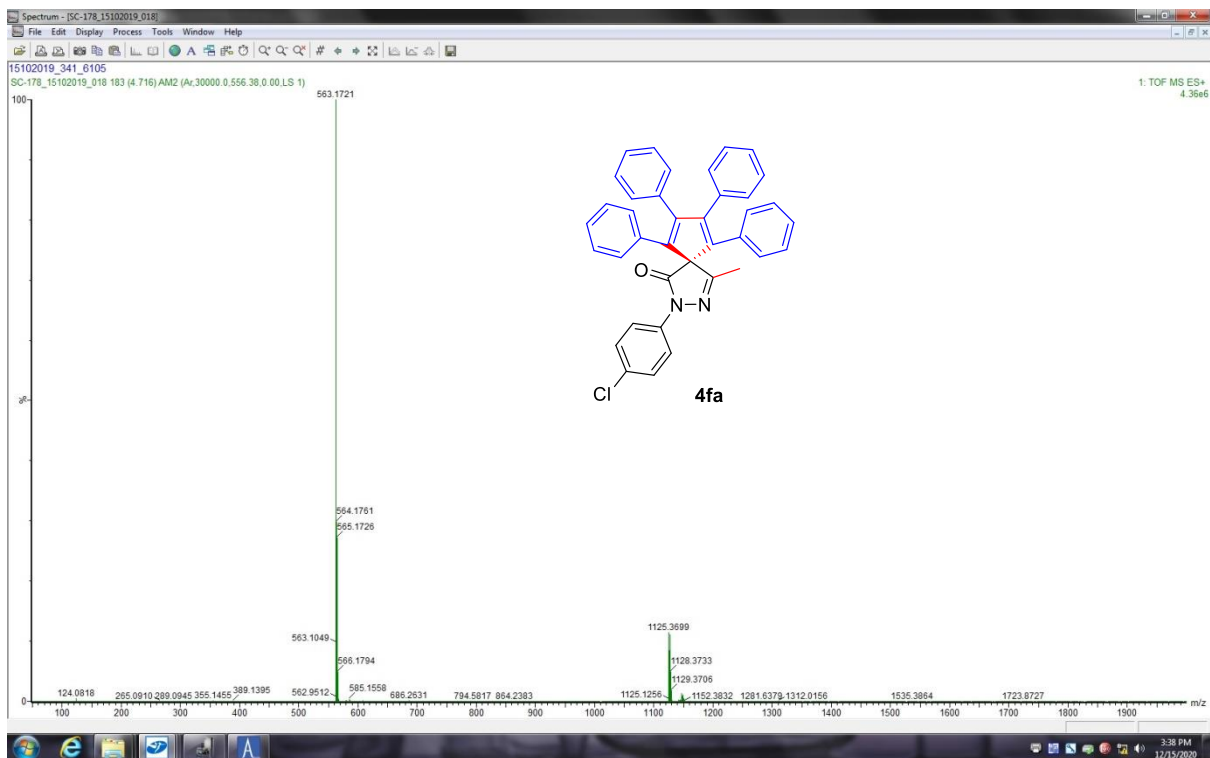

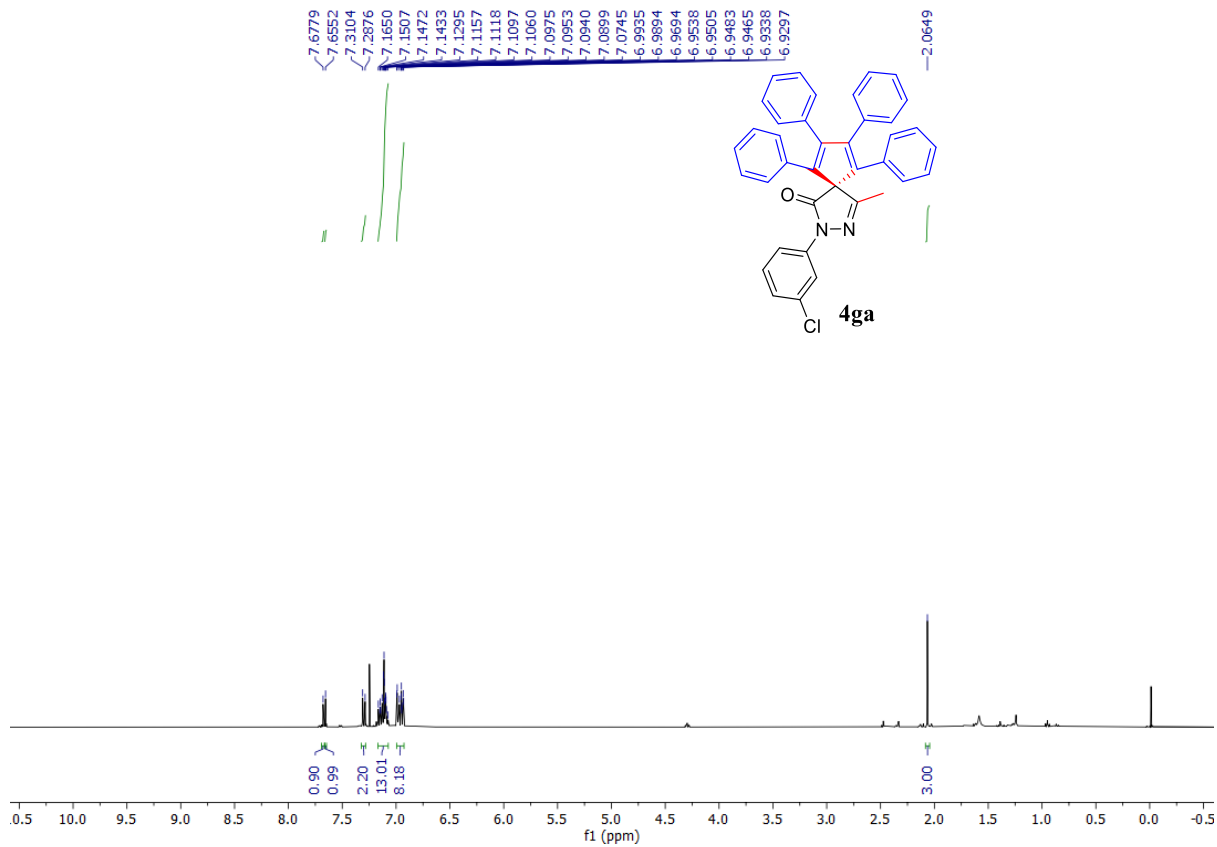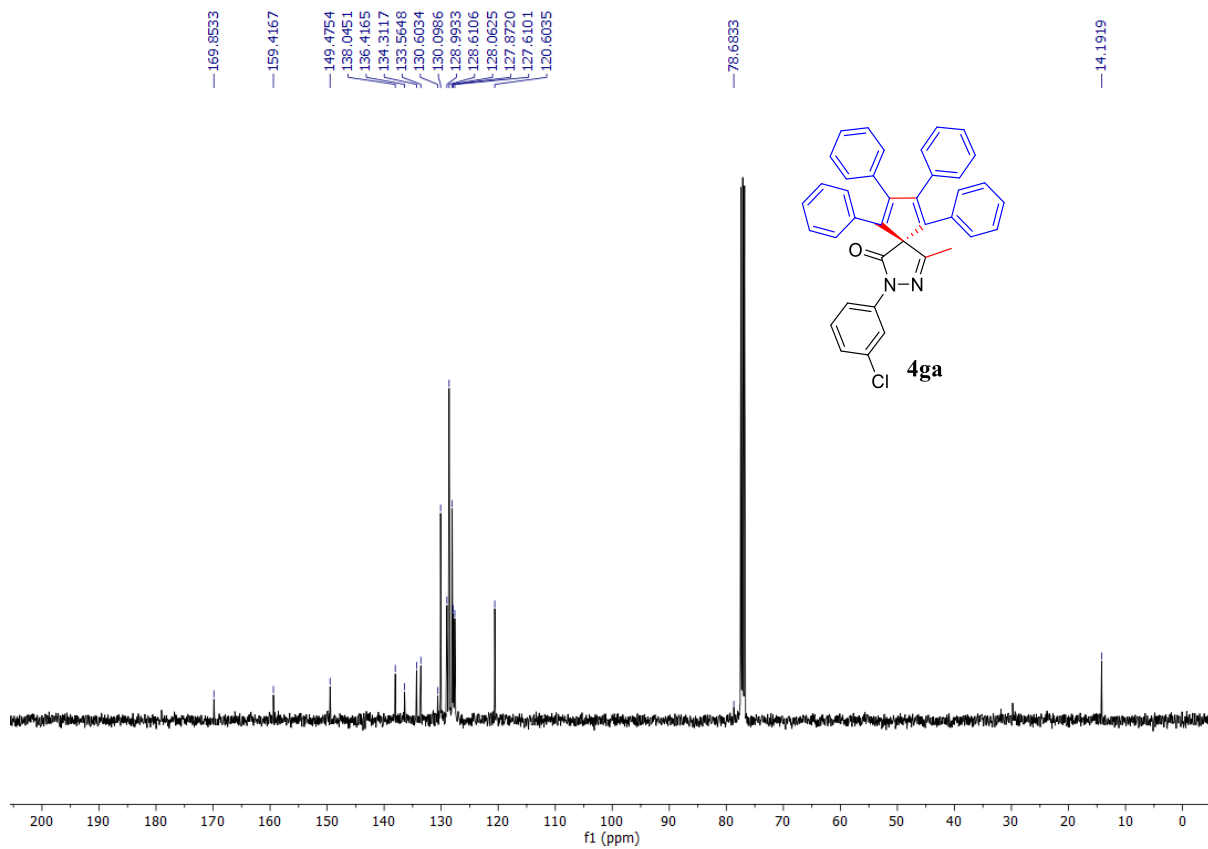

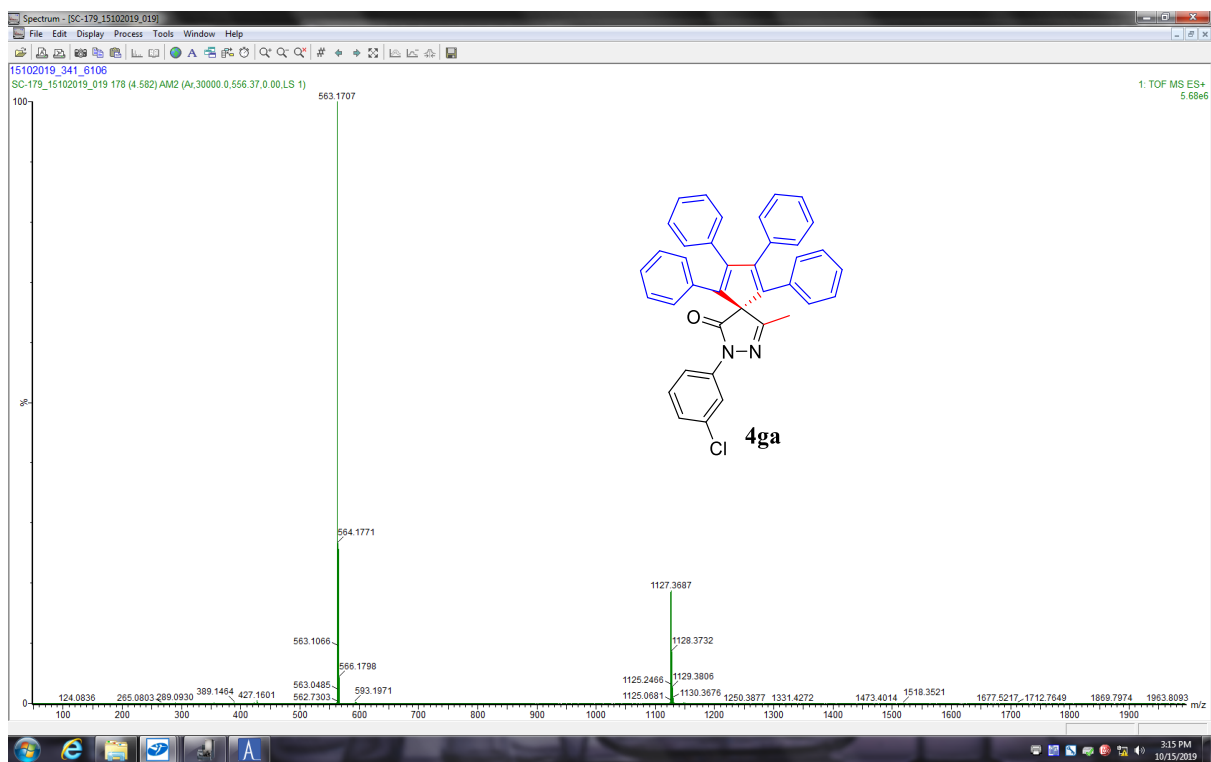

NOE of compound **3ha**

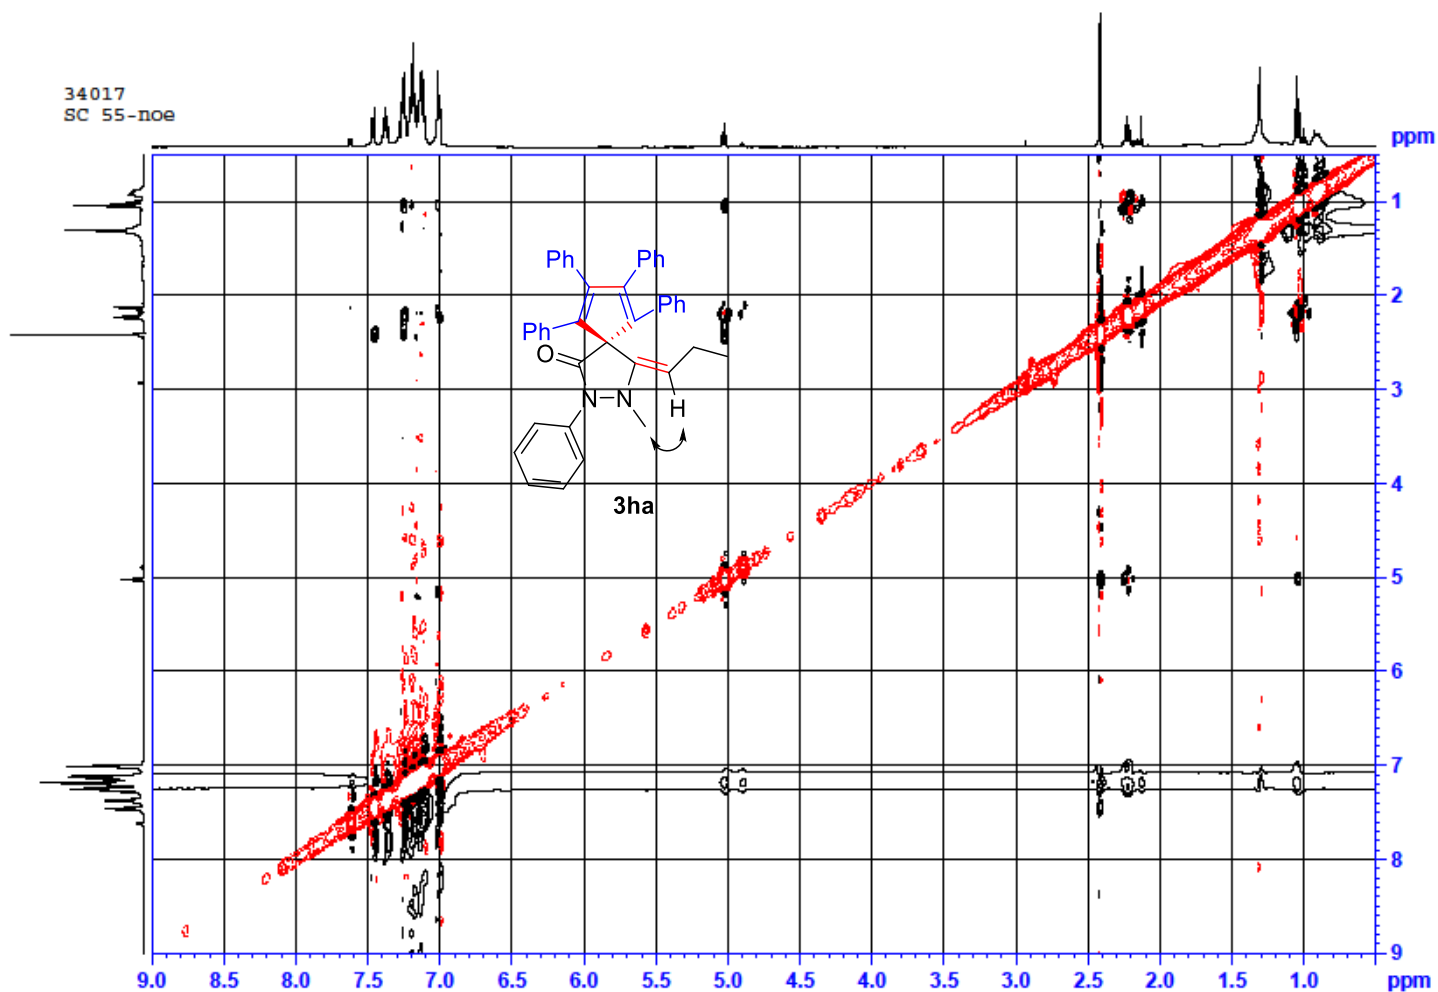

Expanded form of NOE of **3ha**:

34017  
SC 55-noe

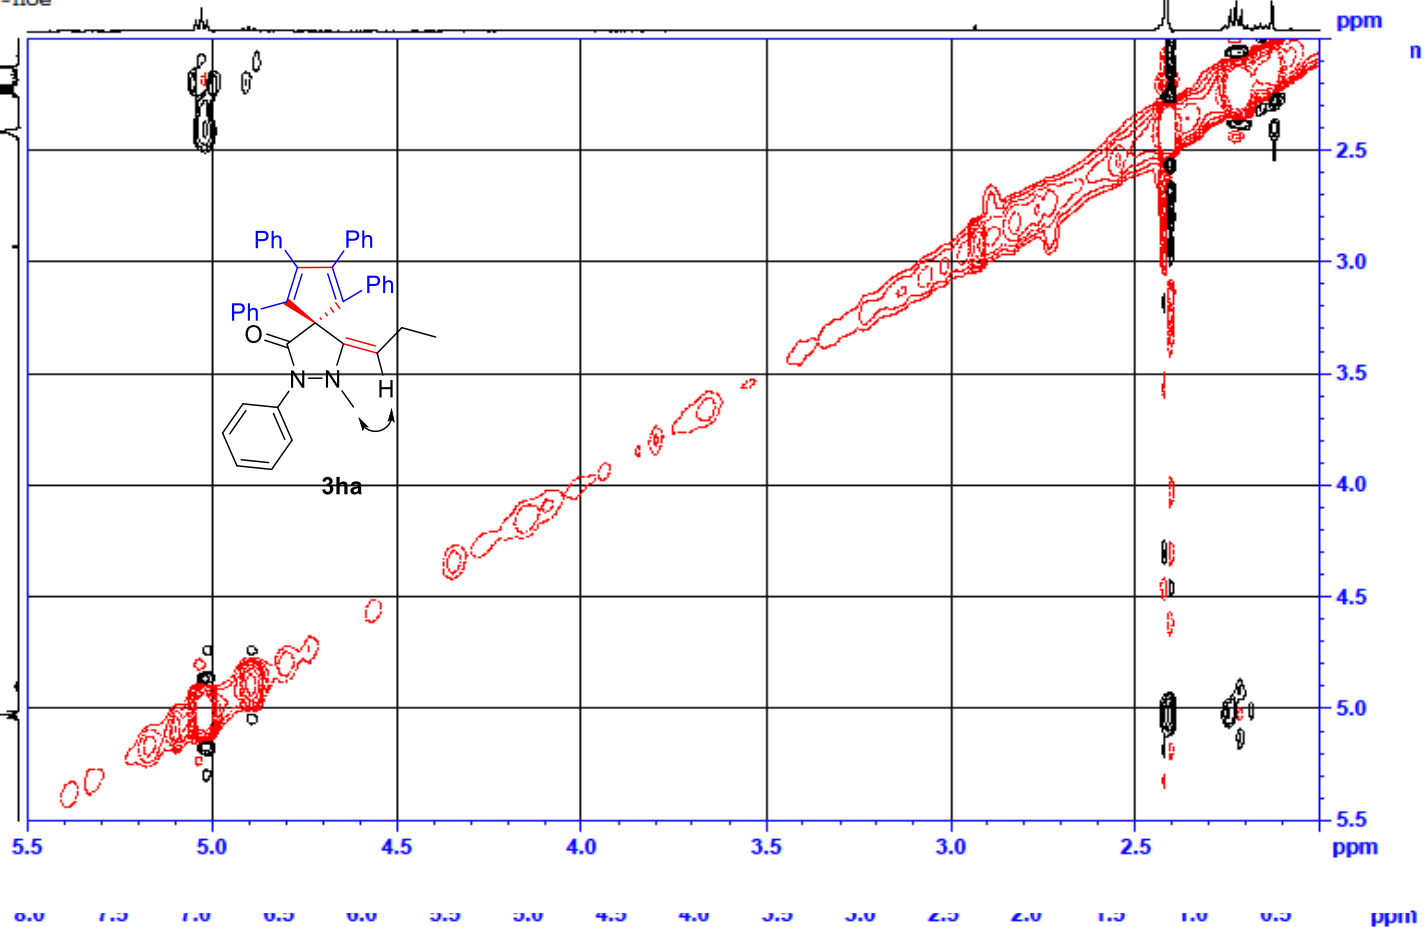



NOE of **3ag**:

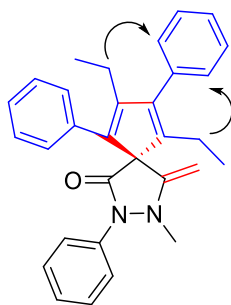

**3ag** (major isomer)

Significant interaction in NOE spectrum of compound **3ag**

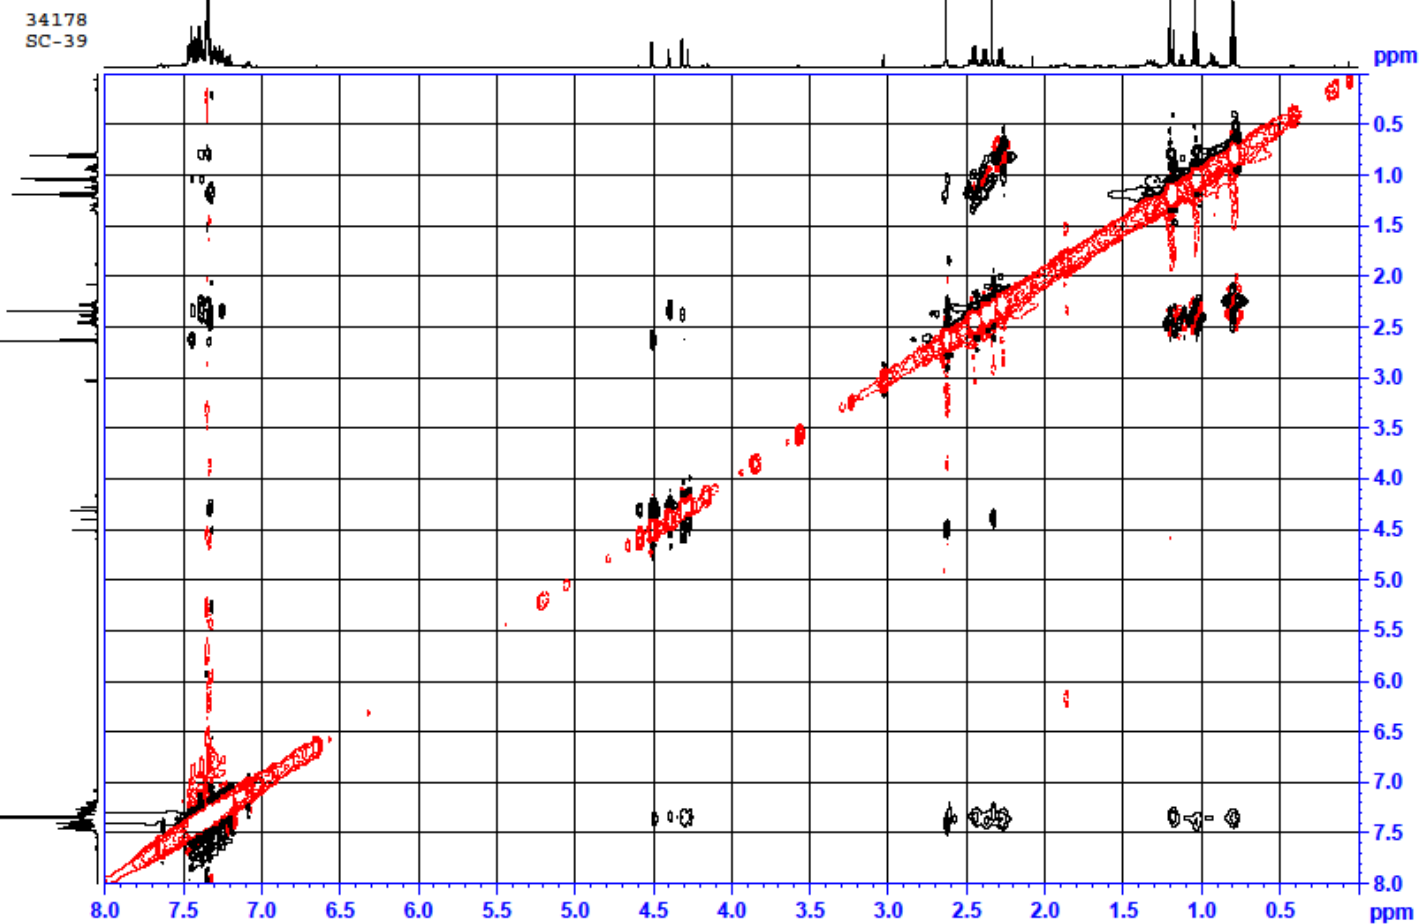

NOE of **3ag** (Expanded form):

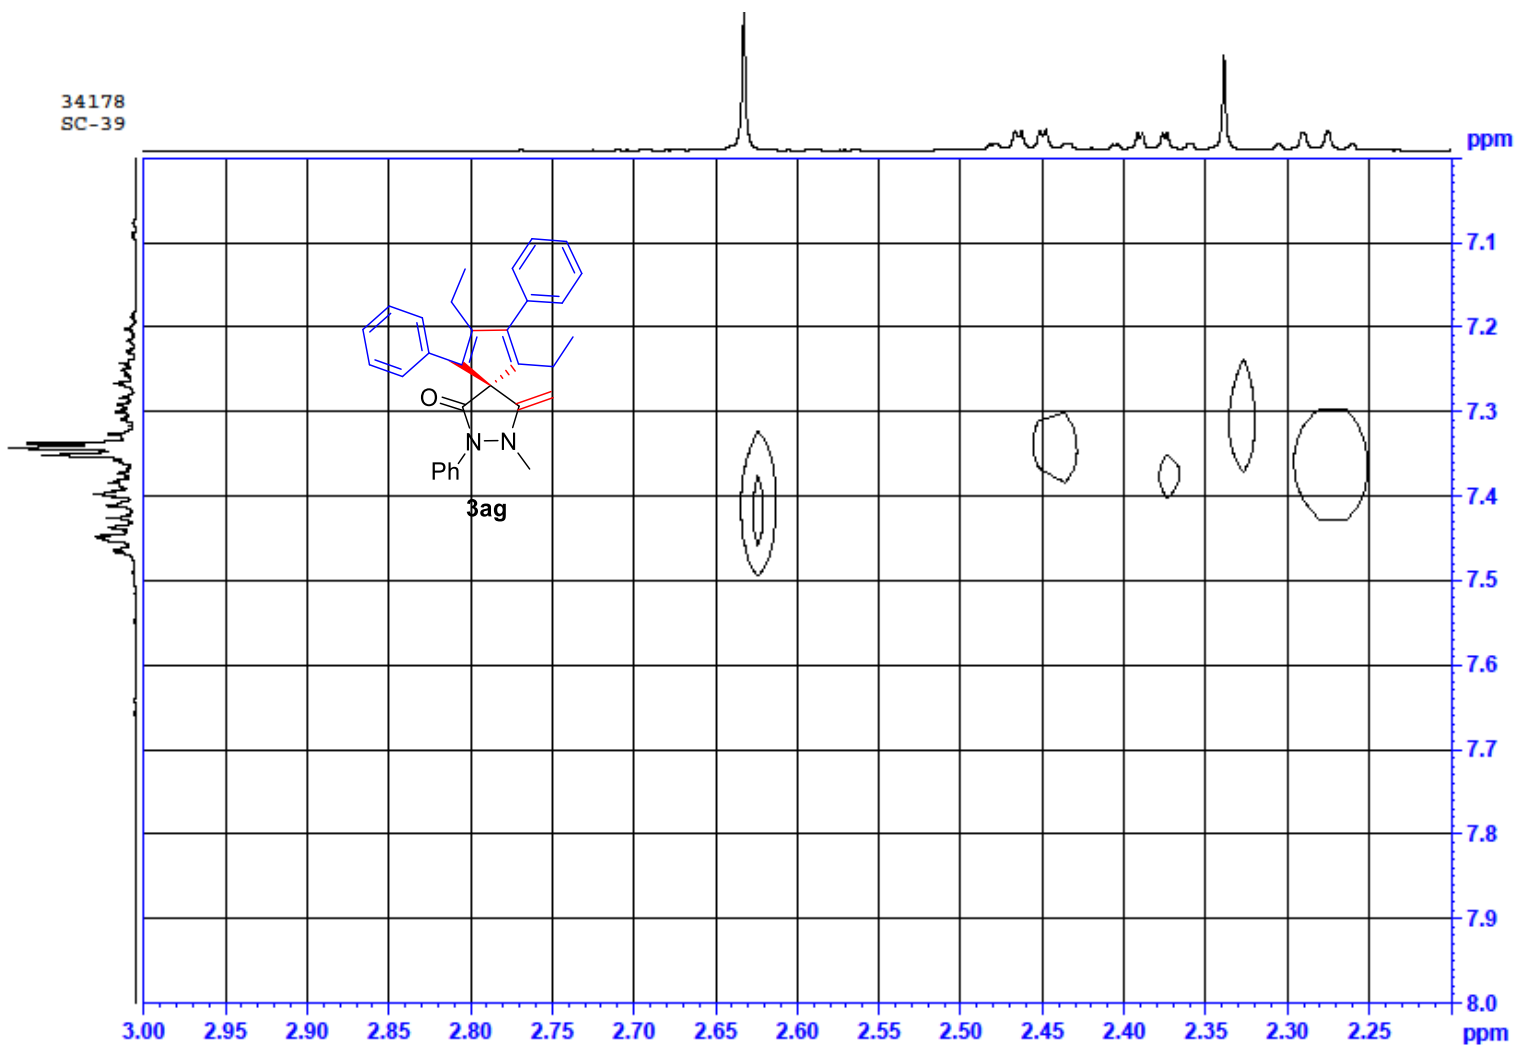

HMBC of 3ah:

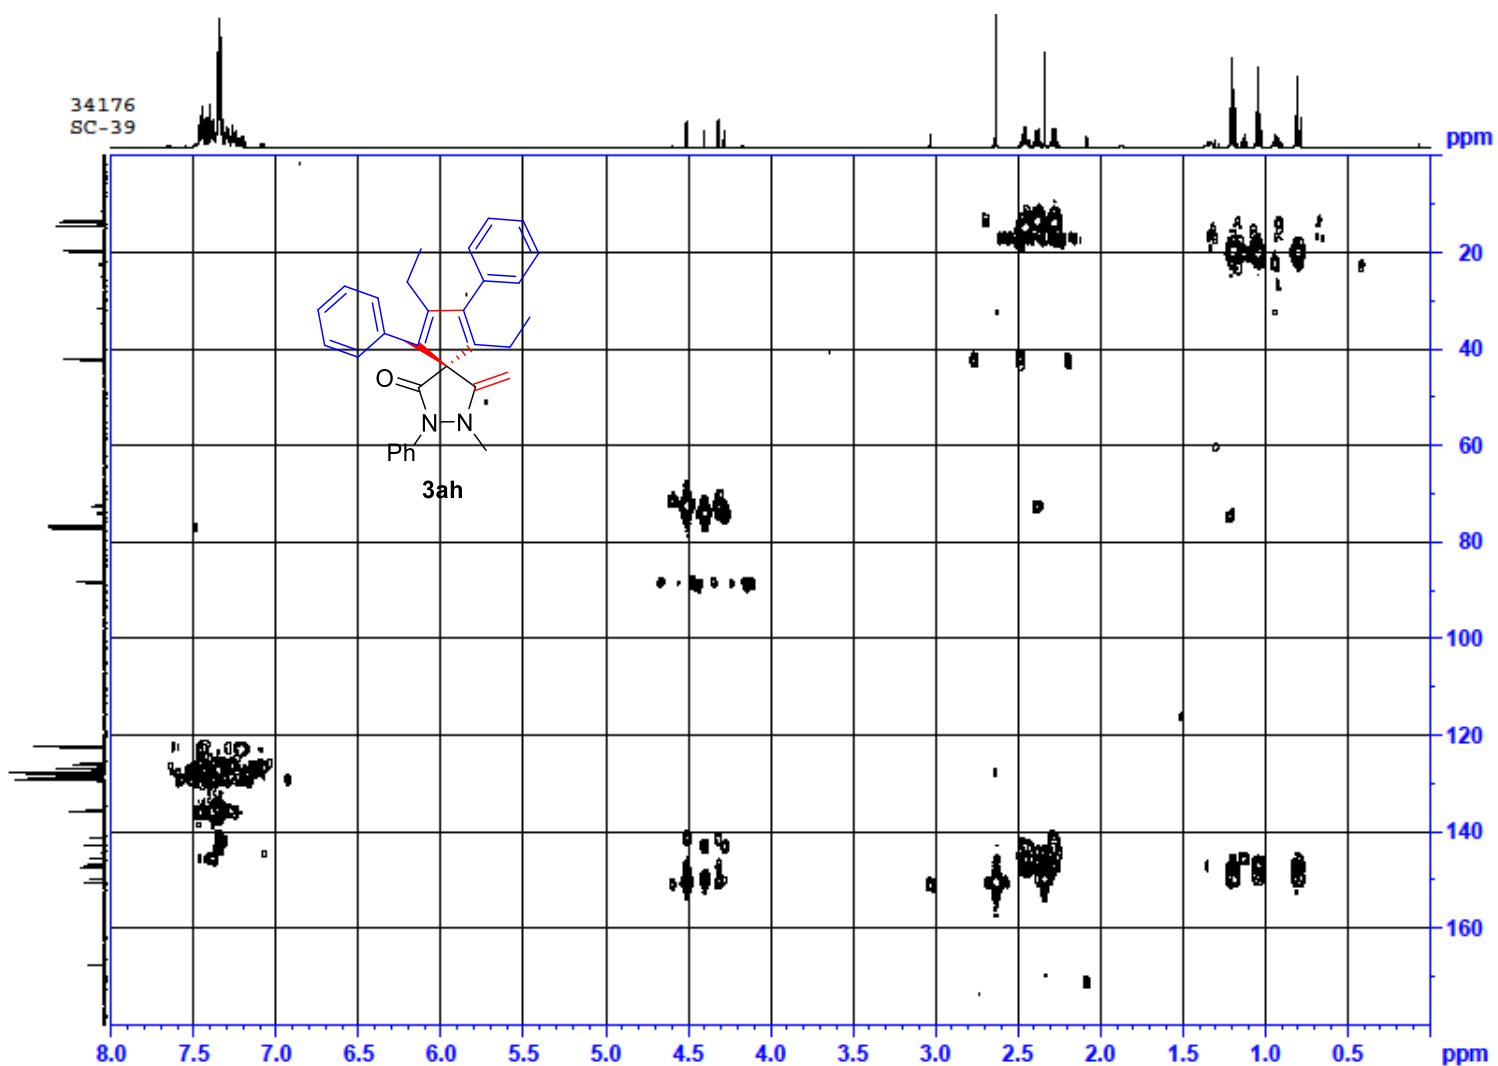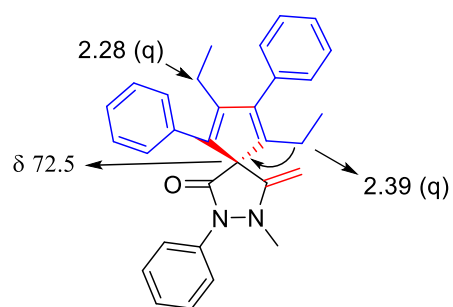

3ah (major isomer)

Significant interaction in HMBC spectrum of compound 3ah

## HMQC of 3ah:

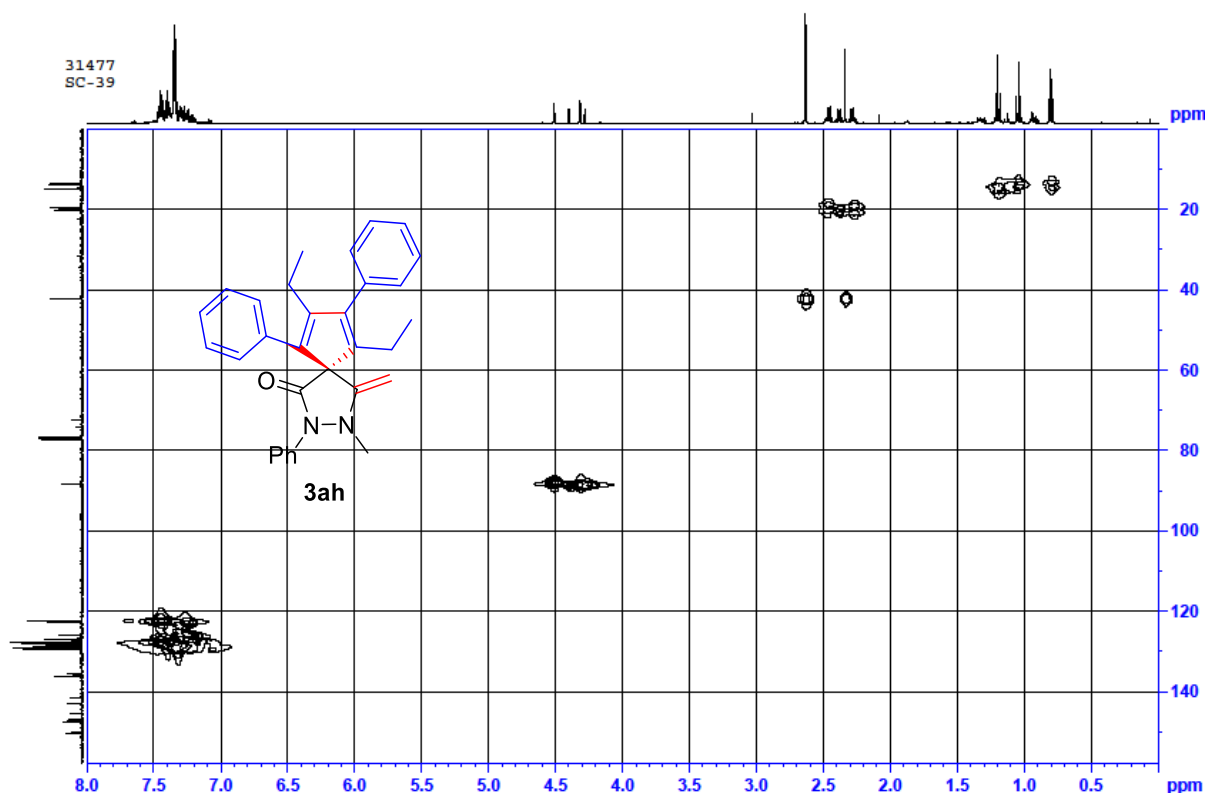

**X-Ray crystallographic data of compound 3aa:** Empirical Formula-  $C_{39}H_{30}N_2O$ ,  $M = 542.65$ , triclinic, Space group P-1,  $a = 10.9996(6) \text{ \AA}$ ,  $b = 12.1270(6) \text{ \AA}$ ,  $c = 23.4345(12) \text{ \AA}$ ,  $V = 3028.0(3) \text{ \AA}^3$ ,  $Z = 4$ ,  $T = 100 \text{ K}$ ,  $\rho_{\text{calcd}} = 1.190 \text{ g/cm}^3$ ,  $2\theta_{\text{max.}} = 28.819^\circ$ , Refinement of 759 parameters on 7364 independent reflections with  $wR_2 = 0.1920$  and  $S = 0.937$ . The crystal structure has been deposited at the Cambridge Crystallographic Data Centre (CCDC 1944638). The data can be obtained free of charge via the Internet at [www.ccdc.cam.ac.uk/data\\_request](http://www.ccdc.cam.ac.uk/data_request).

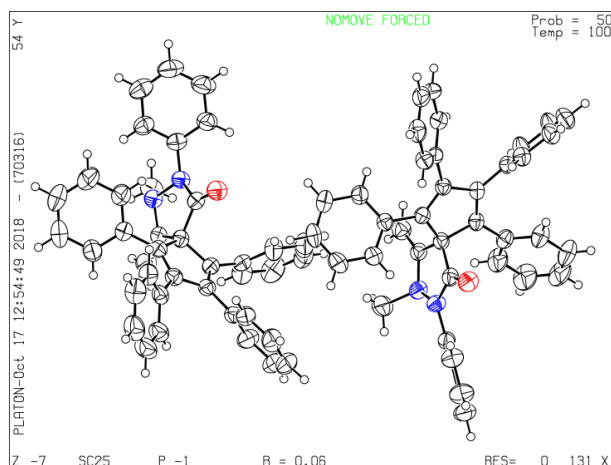

**Fig. S2 X-Ray Structure of Compound 3aa**

**X-Ray crystallographic data of compound 4aa:** Empirical Formula-  $C_{38}H_{28}N_2O$ ,  $M = 528.62$ , orthorhombic, Space group P-21,  $a = 10.6306(8) \text{ \AA}$ ,  $b = 15.1263(11) \text{ \AA}$ ,  $c = 17.9884(14) \text{ \AA}$ ,  $V = 2892.6(4) \text{ \AA}^3$ ,  $Z = 4$ ,  $T = 296(2) \text{ K}$ ,  $\rho_{\text{calcd}} = 1.214 \text{ g/cm}^3$ ,  $2\theta_{\text{max.}} = 25.000^\circ$ , Refinement of 371 parameters on 5081 independent reflections with  $wR_2 = 0.1127$  and  $S = 1.024$ . The crystal structure has been deposited at the Cambridge Crystallographic Data Centre (CCDC-2079413). The data can be obtained free of charge via the Internet at [www.ccdc.cam.ac.uk/data\\_request](http://www.ccdc.cam.ac.uk/data_request).

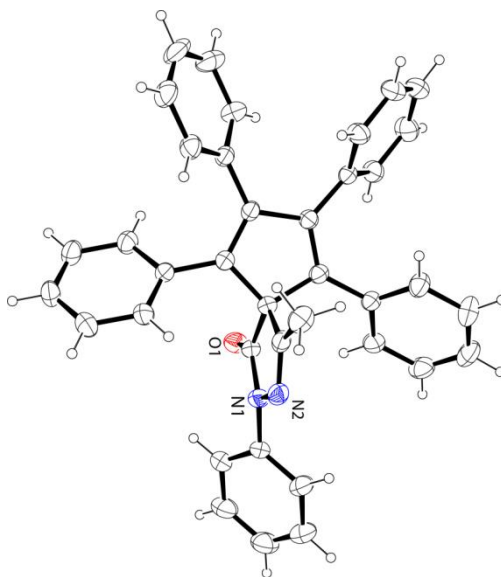

**Fig. S1 X-Ray Structure of Compound 4aa**

3276  
PPS\_D2O\_2ND

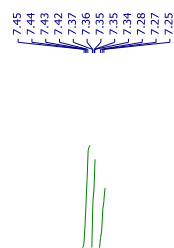

(H:D = 1.9:1)

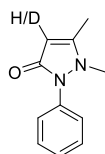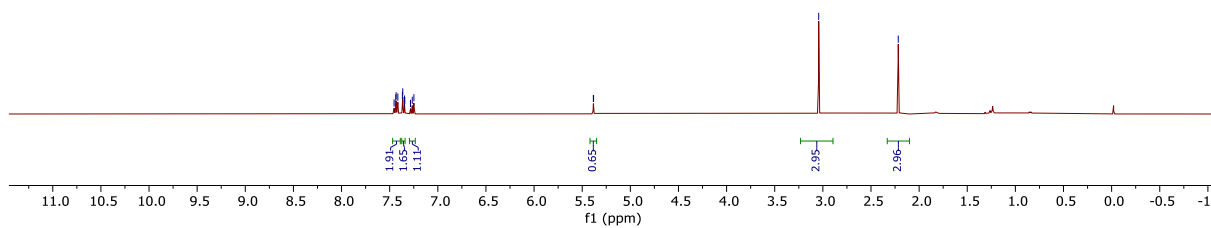

Supplement: d1cc02155a1.pdf [file d1cc02155a1.pdf]
